# Supplementary material for: Medical leadership, a systematic narrative review: do hospitals and healthcare organisations perform better when led by doctors?
Source: PubMed Central journal article supplement — BMJ Open. 2017 Sep 24;7(9):e014474. doi: 10.1136/bmjopen-2016-014474 (PMC5623455; doi:10.1136/bmjopen-2016-014474), 2017-09-24
Supplement: bmjopen-2016-014474.draft_revisions.pdf [file bmjopen-2016-014474.draft_revisions.pdf]

# BMJ Open

BMJ Open is committed to open peer review. As part of this commitment we make the peer review history of every article we publish publicly available.

When an article is published we post the peer reviewers' comments and the authors' responses online. We also post the versions of the paper that were used during peer review. These are the versions that the peer review comments apply to.

The versions of the paper that follow are the versions that were submitted during the peer review process. They are not the versions of record or the final published versions. They should not be cited or distributed as the published version of this manuscript.

BMJ Open is an open access journal and the full, final, typeset and author-corrected version of record of the manuscript is available on our site with no access controls, subscription charges or pay-per-view fees (<http://bmjopen.bmj.com>).

If you have any questions on BMJ Open's open peer review process please email [editorial.bmjopen@bmj.com](mailto:editorial.bmjopen@bmj.com)

# BMJ Open

## Medical leadership systematic review: Do hospitals and healthcare organisations perform better when led by doctors?

|                                 |                                                                                                                                                                                                                                                                                                                                                                                                                                       |
|---------------------------------|---------------------------------------------------------------------------------------------------------------------------------------------------------------------------------------------------------------------------------------------------------------------------------------------------------------------------------------------------------------------------------------------------------------------------------------|
| Journal:                        | <i>BMJ Open</i>                                                                                                                                                                                                                                                                                                                                                                                                                       |
| Manuscript ID                   | bmjopen-2016-014474                                                                                                                                                                                                                                                                                                                                                                                                                   |
| Article Type:                   | Research                                                                                                                                                                                                                                                                                                                                                                                                                              |
| Date Submitted by the Author:   | 27-Sep-2016                                                                                                                                                                                                                                                                                                                                                                                                                           |
| Complete List of Authors:       | Clay-Williams, Robyn; Macquarie University, Australian Institute of Health Innovation<br>Li, Zhicheng; Macquarie University, Australian Institute of Health Innovation<br>Ludlow, Kristiana; Macquarie University, Australian Institute of Health Innovation<br>Testa, Luke; Macquarie University, Australian Institute of Health Innovation<br>Braithwaite, Jeffrey; Macquarie University, Australian Institute of Health Innovation |
| <b>Primary Subject Heading</b>: | Medical management                                                                                                                                                                                                                                                                                                                                                                                                                    |
| Secondary Subject Heading:      | Health services research                                                                                                                                                                                                                                                                                                                                                                                                              |
| Keywords:                       | leadership, HEALTH SERVICES ADMINISTRATION & MANAGEMENT, physician executive, clinician-manager, organisational performance, patient outcomes                                                                                                                                                                                                                                                                                         |
|                                 |                                                                                                                                                                                                                                                                                                                                                                                                                                       |

SCHOLARONE™  
Manuscripts

1 **Title: Medical leadership systematic review: Do hospitals and healthcare organisations perform better**  
2  
3 **when led by doctors?**  
4  
5  
6  
7

8 **Corresponding author:**

9 Robyn Clay-Williams, PhD

10 Australian Institute of Health Innovation

11 Level 6, 75 Talavera Rd Macquarie University, NSW 2109, Australia

12 T: +61 2 9850 2438 | E: [robyn.clay-williams@mq.edu.au](mailto:robyn.clay-williams@mq.edu.au)  
13  
14  
15  
16  
17

18 **Co-authors:**

19 Zhicheng Li, BHsc(Hons)

20 Australian Institute of Health Innovation

21 Macquarie University, Sydney, Australia  
22  
23  
24  
25  
26

27 Kristiana Ludlow, BPsych(Hons)

28 Australian Institute of Health Innovation

29 Macquarie University, Sydney, Australia  
30  
31  
32  
33

34 Luke Testa, MPH

35 Australian Institute of Health Innovation

36 Macquarie University, Sydney, Australia  
37  
38  
39  
40

41 Jeffrey Braithwaite, PhD

42 Australian Institute of Health Innovation

43 Macquarie University, Sydney, Australia  
44  
45  
46  
47  
48

49 **WORD COUNT:** 3,247  
50  
51  
52

53 **KEYWORDS**

54  
55  
56 Leadership, management, physician executive, clinician-manager, organisational performance, patient  
57 outcomes  
58  
59  
60

1  
2  
3  
4  
5  
6  
7  
8  
9  
10  
11  
12  
13  
14  
15  
16  
17  
18  
19  
20  
21  
22  
23  
24  
25  
26  
27  
28  
29  
30  
31  
32  
33  
34  
35  
36  
37  
38  
39  
40  
41  
42  
43  
44  
45  
46  
47  
48  
49  
50  
51  
52  
53  
54  
55  
56  
57  
58  
59  
60

For peer review only

**ABSTRACT**

**Objectives:** Despite a common assumption that doctors are well placed to lead hospitals and healthcare organisations, there is little evidence in the peer-reviewed literature on the performance of doctors in leadership roles in comparison with that of non-medical managers. The aim of this systematic review is to determine whether medical training is associated with superior management performance in terms of organisational performance or patient outcomes.

**Methods:** We searched for peer-reviewed, English language studies using Medline and Embase between 2005 and 2015. We included empirical studies on middle and upper level healthcare managers where participants were both doctors and leaders. We were particularly interested in studies that examined the contribution of medical training or background to performance. Studies were excluded if they did not have full-text available, did not include any organisational or patient measure, or did not allow for performance of medical leaders to be compared with that of non-medically trained managers.

**Results:** The search, conducted in the Medline (n=2,160) and Embase (n=1,166) databases yielded a total of 3,326 entries. After application of inclusion and exclusion criteria, five studies remained. While all five included studies found that there were differences between medical and non-medical managers, only two studies correlated findings with hospital performance or patient outcomes. There were no common themes, with studies examining varied topics: risk aversion, IT adoption, patient care arrangements, financial reporting, staff-to-patient ratios, and the composition of hospital boards and committees.

**Conclusion:** Despite considerable interest in the topic, few studies provided robust evidence on whether hospitals and healthcare organisations perform better when led by doctors. None of the studies identified in our review provided the definitive evidence we seek.

**Strengths and limitations of this study**

- To the best of our knowledge, this is the first systematic review of the literature published over the last decade to determine whether healthcare leaders who are doctors perform better than

1 those with non-medical backgrounds in terms of organisational performance or patient  
2  
3 outcomes

- 4 • We developed robust search strategies and a rigorous reviewing process with the aim to  
5  
6 minimise bias and ensure the objectiveness and transparency of the systematic review  
7  
8
- 9 • There were insufficient studies meeting inclusion criteria to enable our research question to be  
10  
11 fully answered  
12
- 13 • Most studies examined only one or two aspects of leadership; this limited the generalisation of  
14  
15 findings  
16  
17  
18  
19  
20  
21

## 22 BACKGROUND

23  
24 Prior to the 1970s, clinicians very often ran hospitals<sup>1,2</sup> and administrators played a subordinate,  
25  
26 coordination, rather than a leadership, role. As healthcare moved towards a more business-  
27  
28 bureaucratic<sup>3</sup> model of practice, administrators were engaged to manage general organisational-  
29  
30 operational business performance, but doctors continued to expend substantial resources and manage  
31  
32 the major decisions affecting patient care. In 1983, the Griffiths Report<sup>4</sup> was released in the UK, paving  
33  
34 the way for the introduction of a new purchaser-provider model of healthcare. In the USA, the idea  
35  
36 which became known as clinical directorates was established.<sup>5</sup> These ushered in the move to widely  
37  
38 establish the Medical Director role and clinical directors, and enabled over time more senior managers  
39  
40 to have greater control over resources. Doctors did not always consider such roles attractive, but felt  
41  
42 that they needed to take up these part-time appointments in order to continue to partake in decisions  
43  
44 affecting their work. In the 1990s, when managed care was established in the USA,<sup>6</sup> new drivers  
45  
46 emerged as physicians moved from part-time advisory roles into full-time management in order to  
47  
48 contribute to running health care organisations, secure greater control over resource allocation and  
49  
50 participate in senior decision making.  
51  
52  
53  
54  
55  
56  
57  
58  
59

60 Today, clinicians are well-established in management roles, with the first survey of Accountable Care

1 Organisations (ACOs) in the USA finding that by 2014, 51% were led by doctors.<sup>7</sup> Within hospitals and  
2  
3 other healthcare organisations, medical departments are normally led by doctors, and these medical  
4  
5 leaders are typically a member of the executive team (see Dwyer<sup>8</sup> for a literature based review on the  
6  
7 roles of medical managers). By the turn of the 21<sup>st</sup> century in the USA, 50% of physician executives no  
8  
9 longer practiced medicine,<sup>6</sup> and physician executives began to gain acceptance as administrators of  
10  
11 managed care institutions.<sup>9 10</sup> In the UK<sup>2 11</sup> (and elsewhere<sup>11 12</sup>), where the culture was historically less  
12  
13 well disposed to accepting doctors who relinquish their clinical work,<sup>13</sup> the majority of medical  
14  
15 executives today act as 'hybrid managers', who continue to manage a clinical workload alongside their  
16  
17 management responsibilities. Current focus on engaging doctors in leadership centres on efforts to link  
18  
19 clinical decisions with those of strategic management, and has broadened to include key  
20  
21 accountabilities for quality of care in addition to resource management.<sup>14</sup>  
22  
23  
24  
25  
26  
27  
28

29 Despite the prevalence of physician executives occupying leadership roles in health systems, we do not  
30  
31 know to what extent medical training or experience affects the performance of healthcare managers.  
32

33 Previous research has found no difference in performance between medical and non-medical  
34  
35 managers;<sup>15-17</sup> however, opinion on the topic of 'which profession should manage hospitals' is rife.

36  
37  
38 Doctors prefer to be led by doctors,<sup>11</sup> and articles in favour of medical leadership (invariably written by  
39  
40 those with medical qualifications) cite doctors' strengths in addressing patient outcomes, quality and  
41  
42 safety issues, decision making, ability to specialise, and intelligence. Articles against, cite doctors' lack of  
43  
44 formal management training, and their purported weaknesses in financial management, organisational  
45  
46 strategy, ability to generalise from medicine to management, and teamwork. In a survey of hospital  
47  
48 managers in Nepal,<sup>18</sup> for example, just over 50% respondents said that the best people to manage  
49  
50 hospitals were professional hospital managers. However, the answer varied between the professions of  
51  
52 the manager. Only 35% of doctors believed that hospitals should be managed by professional managers.  
53  
54  
55 Instead, 57% of doctors believed that doctors should manage hospitals, compared to 25% for other  
56  
57  
58  
59  
60 staff. There appears to be a view, generally held by physicians, that the physician mindset is different to

1 that of the general healthcare manager.<sup>19 20</sup>

2  
3  
4  
5 The prevailing opinion in some quarters is that physicians are not suitable for executive management as  
6 they are conservative individualists rather than team players, and that they identify more with their  
7 professional responsibilities than their management role.<sup>12 21-23</sup> Contrary to this view, a recent study  
8 surveying clinicians' reactions to hospital reform found that clinicians who were also leaders reacted  
9 more positively to hospital reform than clinicians who spent most of their time caring for patients.<sup>24</sup>  
10  
11  
12  
13  
14  
15  
16  
17  
18  
19  
20  
21  
22  
23  
24  
25  
26  
27  
28  
29  
30  
31  
32  
33  
34  
35  
36  
37  
38  
39  
40  
41  
42  
43  
44  
45  
46  
47  
48  
49  
50  
51  
52  
53  
54  
55  
56  
57  
58  
59  
60  
Clearly, the question 'do hospitals and healthcare organisations perform better when led by doctors?'  
has not been settled.

## 24 METHODS

26 This study presents the results of a systematic review of the literature published over the last decade on  
27 medical leadership. The literature review was undertaken in order to determine what is known about  
28 doctors in executive management, in particular whether medical training is associated with superior  
29 management performance in terms of organisational performance or patient outcomes. The review was  
30 framed by the research question: Do hospitals and healthcare organisations perform better when led by  
31 doctors?  
32  
33  
34  
35  
36  
37  
38  
39  
40  
41  
42

### 43 Search strategy

45 We searched for peer-reviewed, English language studies using Medline and Embase between 1<sup>st</sup>  
46 January 2005 and 31<sup>st</sup> December 2015 (Search strategies are presented in table 1). The search was  
47 designed to capture both the executive leadership and the medical practitioner role. Three terms were  
48 included for executive leadership and linked using the Boolean operator OR to maximise the sensitivity  
49 of the search: "executive", "leader", or "manager". For the role of medical practitioner, terms including  
50 "physician", "clinician", and "doctor" are used sometimes interchangeably in literature. Thus we  
51 searched for all three terms using the OR operator. Both searches were combined, and refined using a  
52  
53  
54  
55  
56  
57  
58  
59  
60



proximity operator. Search results from Medline and Embase were then aggregated and imported to an EndNote library. Duplicate entries were removed and four reviewers (RCW, KL, ZL and LT) conducted a title and abstract screen of the remaining citations. The reviewers worked in pairs, and cross-checked 5% of the citations to establish inter-rater reliability.

**Table 1. Medline and Embase search strategies**

| Database | Medline                                                                                    |         |
|----------|--------------------------------------------------------------------------------------------|---------|
| Strategy | Searches                                                                                   | Results |
| #1       | ((executive\$ or leader\$ or manager\$) adj3 (physician\$ or doctor\$ or clinician\$)).ab. | 2,722   |
| #2       | Limit #1 to (English language and yr="2005 - Current")                                     | 1,218   |
| #3       | *Physician Executives/                                                                     | 2,794   |
| #4       | Limit #3 to (English language and yr="2005 - Current")                                     | 1,003   |
| #5       | #2 or #4                                                                                   | 2,160   |
| Database | Embase                                                                                     |         |
| Strategy | Searches                                                                                   | Results |
| #1       | ((executive\$ or leader\$ or manager\$) adj3 (physician\$ or doctor\$ or clinician\$)).ab. | 3,607   |
| #2       | Limit #1 to (English language and yr="2005 - Current" and article)                         | 1,166   |

### Eligibility criteria

We included studies on middle and upper level managers in healthcare organisations that included either participants who were both doctors and leaders, or data pertaining to managers who were also doctors. Studies were excluded if they were not peer-reviewed, or did not report findings from empirical research. We also excluded studies that did not examine the contribution of medical training or background to performance. Further criteria were added following discussion among the reviewers during the full-text review, and studies were excluded if they did not have full-text available, did not include any organisational or patient measure, or did not allow for performance of medical leaders to be compared with that of non-medically trained managers.

### Data collection process

1 Data from the included studies were extracted into a locally developed form for analysis. Elements  
2  
3 extracted were: a) the full reference, b) location, c) language, d) period of data collection, e) study type,  
4  
5 f) study primary and secondary aims, g) exclusion criteria, h) data: total number of organisations, type of  
6  
7 organisations, data types and sources used to performance and/or outcomes, methodological/statistical  
8  
9 approach to identify performance and/or outcomes, i) methods: methods used to study  
10  
11 contextual/success factors associated with medical leaders (e.g., interview, survey, observation),  
12  
13 participants, and data analysis methods, j) findings: quantitative results and qualitative results or  
14  
15 contextual factors most important for explaining relationship between medical background of leader  
16  
17 and performance, and k) implications.  
18  
19  
20  
21  
22  
23

## 24 **Synthesis of results**

25  
26 Results were synthesised through inductive interpretive analysis of extracted data. Extracted data were  
27  
28 coded and organised to explore connections between data elements and to develop sets of concepts.  
29  
30 Segments of data were then linked in a formal fashion in order to allow themes to emerge, and to  
31  
32 determine relationships that may exist between different data elements.  
33  
34  
35  
36  
37

## 38 **RESULTS**

### 39 **Search strategy**

40  
41 The search results and review process are presented in Figure 1 using the Preferred Reporting Items for  
42  
43 Systematic Review and Meta-analyses (PRISMA) flow chart. The search performed on Medline (n=2,160)  
44  
45 and Embase (n=1,166) yielded a total of 3,326 entries, among which 1108 were identified as duplicates  
46  
47 and removed from the EndNote library. Title and abstract of the remaining citations (n=2,218) were  
48  
49 screened by four reviewers (RCW, KL, ZL and LT). The citations were randomised and 5% (n=110) were  
50  
51 subject to a double-review process, in which the reviewing team split into two pairs (KL and ZL pair 1,  
52  
53 RCW and LT pair 2) and each pair reviewed 55 citations. To test inter-rater reliability, we used Cohen's  
54  
55 Kappa and found high levels of agreement between the paired reviewers,  $K=.78$  ( $p<.0001$ ) for pair 1 and  
56  
57  
58  
59  
60

1 K=.88 ( $p<.0001$ ) for pair 2. The remaining 95% of the citations were evenly divided among the team and  
2  
3 the reviewing process was conducted independently and simultaneously by each reviewer, with regular  
4  
5 discussions held at team meetings. The screening of title and abstract resulted in 80 studies eligible for  
6  
7 full-text review. During the full-text review stage, a set of predetermined exclusion criteria was applied,  
8  
9 leaving 13 studies included in the penultimate pool. Upon further review and consultation with the  
10  
11 team, an additional exclusion criterion was added to enable comparison of medical and non-medical  
12  
13 leadership, which eliminated eight more studies.  
14  
15

### 19 **Description of included studies**

21 Four broad categories of articles were found in the search: (1) individual perspectives on medical  
22  
23 management, (2) empirical research based on opinion about medical management (surveys, interviews,  
24  
25 focus groups), (3) objective empirical research on the role or characteristics of healthcare leaders  
26  
27 (observations, other data), and (4) objective empirical research on the relationship between medical  
28  
29 leaders and outcomes (hospital performance data, patient outcomes).  
30  
31  
32

33  
34  
35  
36 Thirteen studies included participants who were both doctors and leaders, however only five studies  
37  
38 compared the performance of doctors with that of non-medical managers to address our primary  
39  
40 question of 'Do hospitals and healthcare organisations perform better when led by doctors?' The  
41  
42 remaining eight studies presented data on managers who were also doctors, but presented data that  
43  
44 were peripheral to our question. Even then, few studies addressed more than one or two narrow  
45  
46 aspects of healthcare leadership. All five included studies conducted quantitative analysis of  
47  
48 questionnaire survey data; one study (Jiang et al.<sup>25</sup>) also provided processes of care data. Three studies  
49  
50 were from the USA, one from Ireland and one from Germany (Table 2).  
51  
52  
53

54  
55  
56  
57 O'Keefe<sup>26</sup> measured and compared risk aversion in 788 Irish clinicians, clinical managers, non-clinical  
58  
59 managers, and non-clinical public representatives, in terms of willingness to discharge a patient from  
60

1 the Emergency Department (ED). The study found no significant difference between clinicians and  
2  
3 clinician managers, but found significant differences between clinicians and non-clinicians (including  
4  
5 between clinical and non-clinical managers), with the non-clinical participants being more risk averse.  
6  
7 Limitations included: (1) there was a large variation in risk tolerance, even between clinicians, (2) it was  
8  
9 a single study in a single country, and (3) clinicians are likely to be more familiar both with actual events  
10  
11 depicted in the scenarios, and also with the process of making treatment choices that may result in  
12  
13 death. The study did not provide indication of an objectively appropriate level of risk, but the authors  
14  
15 suggested that the clinicians had a more pragmatic approach to decision-making.  
16  
17  
18  
19  
20

21  
22 In the USA, Colla et al.<sup>7</sup> measured how doctor-led organisations compared with other Accountable Care  
23  
24 Organisations (ACOs) in terms of structure, size and care provided, and explored the degree of doctor  
25  
26 engagement in managing ACOs. ACOs are groups of providers that are jointly responsible for caring for a  
27  
28 nominated population of patients. Fifty one percent of the 173 ACOs in the study self-identified as  
29  
30 physician-led, 33% as jointly led by hospital and physician, and the remainder were led by hospitals or  
31  
32 other entities. Doctor-led ACOs were found to be more likely to have advanced IT capabilities and better  
33  
34 outpatient care than non doctor-led ACOs, and were more likely to measure and report financial  
35  
36 performance at practice and clinicians levels; however this finding was confounded by the fact that  
37  
38 physician-led ACOs are less likely to include hospitals and more likely to include physician groups.  
39  
40 Performance of ACOs was not assessed, therefore it was not possible to determine whether  
41  
42 performance was related to whether leaders were doctors or non-medical managers.  
43  
44  
45  
46  
47  
48  
49

50 Kuntz et al.<sup>27</sup> assessed the relationship between the amount of medical involvement in leadership and  
51  
52 staff-to-patient ratios. The study was conducted in Germany, where hospitals are managed by an  
53  
54 executive leadership team consisting of a commercial director, medical director and nursing director.  
55  
56 The study was controlled for the size and case mix of the 604 participating hospitals, whether they were  
57  
58 public or private, the degree to which they were rural, and whether the doctors were salaried or  
59  
60

1 contracted. High staff-to-patient ratios for both nurses and doctors are associated with better hospital  
2 performance.<sup>28 29</sup> The study found a relationship between full-time Medical Director (MD) or heavily  
3 involved part-time MD and a higher staff-to-patient ratio. Full time MDs significantly improved the staff-  
4 to-patient ratios for both doctors and nurses (physicians 1.96,  $p<0.01$ ; nurses: 4.44,  $p<0.01$ ), whereas  
5 part-time MDs only improved the staff-to-patient ratios for doctors (e.g., an increase of part-time  
6 involvement from 15 to 25%, resulted in an increase of 2.49 physicians per thousand inpatients).

7  
8  
9  
10  
11  
12  
13  
14  
15  
16  
17 Goodall<sup>30</sup> examined the relationship between hospital performance and whether the Chief Executive  
18 Officer (CEO) was a doctor or a non-medical manager. Hospital performance was determined by media-  
19 generated league tables, produced by US News and World Report's (USNWR) 'Best Hospitals' in 2009.  
20 Three hundred healthcare executives from three specialties (cancer, digestive disorders, heart and heart  
21 surgery) were surveyed in the top 100 USA hospitals. Positive association was found between physician  
22 CEOs and hospital performance for all three hospital specialties ( $p<0.001$ ). While higher performing  
23 hospitals were associated with physician CEOs, causation was not able to be determined (e.g., higher  
24 performing hospitals may just prefer to have physicians as leaders).

25  
26  
27  
28  
29  
30  
31  
32  
33  
34  
35  
36  
37  
38 Jiang et al.<sup>25</sup> examined whether differences exist in quality performance of 490 USA hospitals in relation  
39 to adoption of particular practices in board oversight of quality. Data consisted of 1) a survey of 562  
40 hospital CEOs on board practices, (2) process of care measures for three clinical conditions (heart attack,  
41 heart failure, pneumonia), and (3) outcomes measures, consisting of risk adjusted mortality rates, for  
42 the same three conditions. Significantly better performance in processes of care and/or mortality was  
43 found for hospitals that had representatives with clinical expertise serving on the quality board. Sixty  
44 percent of participating hospitals had a Chief Medical Officer or Vice President of Medical Affairs on the  
45 committee; this resulted in significantly higher process of care scores (85.3% vs 81.0%,  $p<0.05$ ) and  
46 lower risk adjusted mortality rates (5.6% vs 7.3%,  $p<0.05$ ) than hospitals that did not have a Chief  
47 Medical Officer or Vice President of Medical Affairs as a committee member. Eighty three percent of  
48  
49  
50  
51  
52  
53  
54  
55  
56  
57  
58  
59  
60

participating hospitals had medical staff on the committee; this resulted in significantly higher process of care scores (84.2% vs 80.9%,  $p < 0.05$ ) but no difference in risk adjusted mortality rates. Sixty three percent of participating hospitals had a clinical board member on the committee; this resulted in no difference in process of care scores but significantly lower risk-adjusted mortality rates (5.7% vs 7.2%,  $p < 0.05$ ).

**Table 2. Characteristics of included studies**

| Study                             | Country | Study type                              | Sample size                                                                                                   | Analysis method       |
|-----------------------------------|---------|-----------------------------------------|---------------------------------------------------------------------------------------------------------------|-----------------------|
| O'Keefe (2015) <sup>26</sup>      | Ireland | Questionnaire survey                    | 788 respondents (180 physicians, 47 clinical managers, 143 non-clinical managers, 418 public representatives) | Quantitative analysis |
| Colla et al. (2014) <sup>7</sup>  | USA     | Questionnaire survey                    | 173 Accountable Care Organisations                                                                            | Quantitative analysis |
| Kuntz et al. (2013) <sup>27</sup> | Germany | Questionnaire survey                    | 604 hospitals                                                                                                 | Quantitative analysis |
| Goodall (2011) <sup>30</sup>      | USA     | Questionnaire survey                    | 300 healthcare executives                                                                                     | Quantitative analysis |
| Jiang et al. (2009) <sup>25</sup> | USA     | Questionnaire survey, Processes of care | 562 healthcare executives, 490 hospitals                                                                      | Quantitative analysis |

### Risk of bias

Risk of bias was assessed using criteria developed by Hawker, et al.<sup>31</sup> Ratings were assigned (poor, fair, good) across nine different categories: 1) abstract and title, 2) introduction and aims, 3) method and data, 4) sampling, 5) data analysis, 6) ethics and bias, 7) results, 8) transferability or generalisability, 9) implications and usefulness (Table 3).<sup>31</sup> While studies were generally well designed and executed, generalisability and usefulness of the findings was low.

**Table 3. Methodology rigour and risk of bias**

| Study                        | O'Keefe (2015) <sup>26</sup> | Colla et al. (2014) <sup>7</sup> | Kuntz et al. (2013) <sup>27</sup> | Goodall (2011) <sup>30</sup> | Jiang et al. (2009) <sup>25</sup> |
|------------------------------|------------------------------|----------------------------------|-----------------------------------|------------------------------|-----------------------------------|
| <b>Abstract and title</b>    | Good                         | Fair                             | Fair                              | Fair                         | Fair                              |
| <b>Introduction and aims</b> | Fair                         | Fair                             | Good                              | Fair                         | Fair                              |
| <b>Method and data</b>       | Fair                         | Good                             | Good                              | Fair                         | Fair                              |
| <b>Sampling</b>              | Good                         | Good                             | Good                              | Poor                         | Fair                              |
| <b>Data analysis</b>         | Good                         | Poor                             | Good                              | Fair                         | Fair                              |

|                                    |      |      |      |      |      |
|------------------------------------|------|------|------|------|------|
| <b>Ethics and bias</b>             | Good | Poor | Good | Poor | Fair |
| <b>Findings</b>                    | Fair | Good | Good | Fair | Fair |
| <b>Generalisability</b>            | Fair | Good | Fair | Poor | Fair |
| <b>Implications and usefulness</b> | Poor | Fair | Fair | Poor | Fair |

## DISCUSSION

### Themes

While all five included studies found that there were differences between medical and non-medical managers, only two studies<sup>25 30</sup> correlated findings with hospital performance or patient outcomes.

While Goodall<sup>26</sup> found that there was an association between medical leadership and hospital performance, the study did not provide sufficient information that would allow us to determine why that might be the case. Neither of these studies provided data on the characteristics of medical leaders that were associated with higher performance. There were no common themes, with studies examining varied topics: risk aversion, IT adoption, patient care arrangements, financial reporting, staff-to-patient ratios, and the composition of hospital boards and committees.

### Additional evidence

While we were specifically looking for studies that compared managers who are also doctors with managers who do not have medical qualifications, and that attempted to identify associated organisational or patient outcomes, our search also identified studies that explored the characteristics of managers who were doctors, including barriers or enablers for doctors seeking to enter management.

While not answering our research question, these studies provide clues to where medical and non-medical managers may differ. Ham et al.<sup>32</sup> investigated, via 22 qualitative interviews, the experiences of doctors who become chief executives of UK National Health Service organisations. They identified the type of doctor that becomes a manager, and barriers and enablers to doctors entering management, and found that medical managers tended to be “keen amateurs” rather than trained managerial

1 professionals. Kisa and Ersoy,<sup>33</sup> via a 31 item time management questionnaire, characterised the time  
2 management difficulties of physician administrators working in 48 primary healthcare facilities in  
3 Turkey, and found that medical managers have poor time management skills. Medical managers are not  
4 usually trained in leadership,<sup>11 32</sup> which may explain both these findings and some of the negative  
5 perceptions of doctors as managers. Doctors who receive leadership or management training, however,  
6 may perform well in leadership roles. Xirasagar et al.<sup>34 35</sup> for example, when examining the relationship  
7 between leadership styles, training, and effectiveness of doctors who are managers, concluded that  
8 doctors who completed managerial training such as MBAs, MHAs, MPHs, or more than 30 days of in-  
9 service training were likely to be more effective leaders.

10 There are also some indications that doctors should adopt a more multidisciplinary approach to be  
11 effective leaders. West and Barron<sup>36</sup> investigated, via qualitative interviews, the social and geographical  
12 boundaries of the networks of senior nurse executive and physician leaders and managers in acute care  
13 hospitals in the UK. They found that medical managers consult or network mostly with other medical  
14 managers, and that it is the non-medical managers who act as brokers between professional groups.  
15 This finding is supported by other work in the field.<sup>37</sup>

16 Finally, there were some indications that doctors who combined management with clinical practice  
17 were less likely to be effective in their non-clinical leadership role. Two studies examined the role of the  
18 hybrid medical manager. Kippist and Fitzgerald<sup>12</sup> examined tensions between hybrid clinician managers'  
19 professional values and healthcare organisations' management objectives in Australian hospitals via 14  
20 semi-structured interviews and observation of interactions between team members at several team  
21 meetings. Their study found that hybrid managers would prioritise clinical work over management,  
22 leading to additional burden on their managerial colleagues, thereby questioning the effectiveness of  
23 the hybrid clinician manager. Spehar et al.<sup>23</sup> explored influences and strategies employed by 30 hybrid  
24 leaders in four hospitals in Norway via interviews and observations. The study concluded that doctors



1 who were managers could not influence other doctors without drawing on professional power, and that  
2  
3 doctors felt they had to maintain their clinical skills to retain credibility among peers. This emphasis on  
4  
5 professional skill constrained doctors from drawing effectively on positional power. This expert power  
6  
7 was not retained and had to be continuously regenerated. In addition, rather than collaborating, doctors  
8  
9 saw clinician managers of other departments as competitors, and saw themselves as representatives of  
10  
11 their own professional group.  
12  
13

### 14 15 16 17 **Limitations**

18  
19 There were insufficient studies meeting inclusion criteria to enable our research question to be robustly  
20  
21 answered. Most studies examined only one or two aspects of leadership; this limited the generalisation  
22  
23 of findings.  
24  
25  
26  
27

### 28 29 **CONCLUSION**

30  
31 Despite considerable interest in healthcare on whether hospitals and healthcare organisations perform  
32  
33 better when led by doctors, and much opinion on the matter, there are few studies that have examined  
34  
35 this topic in a robust way or directly compared the performance of medical and non-medical managers.  
36  
37 We found only five studies that provided empirical data in respect of this question, yet none of the  
38  
39 studies provided the definitive answer we seek.  
40  
41  
42  
43  
44

### 45 46 **FUNDING**

47  
48 This research received no specific grant from any funding agency in the public, commercial or not-for-  
49  
50 profit sectors.  
51  
52  
53  
54

### 55 56 **COMPETING INTERESTS**

57  
58 The authors have read and understood the *BMJ* policy on declaration of interests and declare that we  
59  
60 have no competing interests.

## DATA SHARING

The full dataset is available from the corresponding author on request.

## AUTHORS' CONTRIBUTIONS

RC-W and JB conceptualised the study, KL, ZL and LT conducted the database searches. RC-W, KL, ZL and LT conducted the search and review strategy, RC-W drafted the manuscript, all authors reviewed the manuscript for critical content.

## REFERENCES

1. Bruce A, Hill S. Relationships between doctors and managers: the Scottish experience. *Journal of Management in Medicine* 1994;8(5):49-57.
2. Buchanan D, Jordan S, Preston D, et al. Doctor in the process: the engagement of clinical directors in hospital management. *Journal of Management in Medicine* 1997;11(3):132-56.
3. Davies HT, Harrison S. Trends in doctor-management relationships. *British Medical Journal* 2003;326(7390):646.
4. Griffiths R. NHS management inquiry: report to the Secretary of State for Social Services. *Department of Health and Social Security, London* 1983.
5. Heyssel RM, Gaintner JR, Kues IW, et al. Decentralized management in a teaching hospital. *New England Journal of Medicine* 1984;310(22):1477-80.
6. Hoff T. The new breed. *Physician Executive* 1996;23(8):31-36.
7. Colla CH, Lewis VA, Shortell SM, et al. First national survey of ACOs finds that physicians are playing strong leadership and ownership roles. *Health Affairs* 2014;33(6):964-71.
8. Dwyer AJ. Medical managers in contemporary healthcare organisations: a consideration of the literature. *Australian Health Review* 2010;34(4):514-22.
9. Bujak J. Physicians in governance: their unique learning curve. *Trustee: the Journal for Hospital Governing Boards* 2005;58(3):28-30.
10. Fulkerson W, Hartung D. Creating a healthy hospital: the demand for physician executives. *Group Practice Journal* 2006;55(9):41.
11. Ham C, Dickinson H. Engaging doctors in leadership. *NHS Institute for Innovation and Improvement, Coventry* 2008.
12. Kippist L, Fitzgerald A. Organisational professional conflict and hybrid clinician managers: the effects of dual roles in Australian health care organisations. *Journal of Health Organization and Management* 2009;23(6):642-55.
13. Mo TO. Doctors as managers: moving towards general management?: The case of unitary management reform in Norwegian hospitals. *Journal of Health Organization and Management* 2008;22(4):400-15.
14. Dickinson H, Ham C, Snelling I, et al. Are we there yet? Models of medical leadership and their effectiveness: an exploratory study. *NIHR Service Delivery and Organisation Programme* 2013.
15. Schneller ES, Greenwald HP, Richardson ML, et al. The physician executive: role in the adaptation of American medicine. *Health Care Management Review* 1997;22(2):90-96.
16. Schultz FC, Pal S, Swan DA. Who should lead a healthcare organization: MDs or MBAs? *Journal of Healthcare Management* 2004;49(2):103.

- 1 17. Clay-Williams R, Braithwaite J. Doctors in executive management: a systematic review of the  
2 peer-reviewed literature. Sydney, Australia: Centre for Clinical Governance Research,  
3 Australian Institute of Health Innovation, University of New South Wales 2012.
- 4 18. Chadwell I, Bhitrakoti R, Khadka R. Measuring Management Training Needs of Hospital  
5 Managers in Nepal. *Journal of Nepal Medical Association* 2012;52(186).
- 6 19. Braithwaite J, Westbrook MT. A survey of staff attitudes and comparative managerial and non-  
7 managerial views in a clinical directorate. *Health Services Management Research*  
8 2004;17(3):141-66.
- 9 20. Davies HT, Hodges C-L, Rundall TG. Views of doctors and managers on the doctor-manager  
10 relationship in the NHS. *British Medical Journal* 2003;326(7390):626-28.
- 11 21. Elina V, Juhani L, Tiina T-J, et al. Doctor-managers as decision makers in hospitals and health  
12 centres. *Journal of Health Organization and Management* 2006;20(2):85-94.
- 13 22. Spehar I, Frich JC, Kjekshus LE. Clinicians' experiences of becoming a clinical manager: a  
14 qualitative study. *BMC Health Services Research* 2012;12(1):1.
- 15 23. Spehar I, Frich JC, Kjekshus LE. Clinicians in management: a qualitative study of managers' use  
16 of influence strategies in hospitals. *BMC Health Services Research* 2014;14(1):1.
- 17 24. Martinussen PE, Magnussen J. Resisting market-inspired reform in healthcare: the role of  
18 professional subcultures in medicine. *Social Science & Medicine* 2011;73(2):193-200.
- 19 25. Jiang H, Lockee C, Bass K, et al. Board oversight of quality: any differences in process of care and  
20 mortality? *Journal of Healthcare Management* 2009;54(1):15.
- 21 26. O'Keeffe ST. A cross-sectional study of doctors', managers' and public representatives' views  
22 regarding acceptable level of risk in discharges from the emergency department. *QJM*  
23 2015;108(7):533-38.
- 24 27. Kuntz L, Scholtes S. Physicians in leadership: the association between medical director  
25 involvement and staff-to-patient ratios. *Health Care Management Science* 2013;16(2):129-  
26 38.
- 27 28. Lang TA, Hodge M, Olson V, et al. Nurse-patient ratios: a systematic review on the effects of  
28 nurse staffing on patient, nurse employee, and hospital outcomes. *Journal of Nursing*  
29 *Administration* 2004;34(7-8):326-37.
- 30 29. Pronovost PJ, Angus DC, Dorman T, et al. Physician staffing patterns and clinical outcomes in  
31 critically ill patients: a systematic review. *Journal of the American Medical Association*  
32 2002;288(17):2151-62.
- 33 30. Goodall AH. Physician-leaders and hospital performance: is there an association? *Social Science*  
34 *& Medicine* 2011;73(4):535-39.
- 35 31. Hawker S, Payne S, Kerr C, et al. Appraising the evidence: reviewing disparate data  
36 systematically. *Qualitative Health Research* 2002;12(9):1284-99.
- 37 32. Ham C, Clark J, Spurgeon P, et al. Doctors who become chief executives in the NHS: from keen  
38 amateurs to skilled professionals. *Journal of the Royal Society of Medicine* 2011;104(3):113-  
39 19.
- 40 33. Kisa A, Ersoy K. The need for time management training is universal: evidence from Turkey.  
41 *Hospital Topics* 2005;83(1):13-19.
- 42 34. Xirasagar S, Samuels ME, Curtin TF. Management training of physician executives, their  
43 leadership style, and care management performance: an empirical study. *American Journal*  
44 *of Managed Care* 2006;12(2):101-8.
- 45 35. Xirasagar S, Samuels ME, Stoskopf CH. Physician leadership styles and effectiveness: an  
46 empirical study. *Medical Care Research and Review* 2005;62(6):720-40.
- 47 36. West E, Barron DN. Social and geographical boundaries around senior nurse and physician  
48 leaders: an application of social network analysis. *Canadian Journal of Nursing Research*  
49 2005;37(3):132-49.
- 50 37. Creswick N, Westbrook J. Examining the socialising and problem-solving networks of clinicians  
51 on a hospital ward. *Conference Proceedings of Social Science Methodology Conference of the*  
52 *Australian Consortium for Social and Political Research (ACSPR)* 2006.

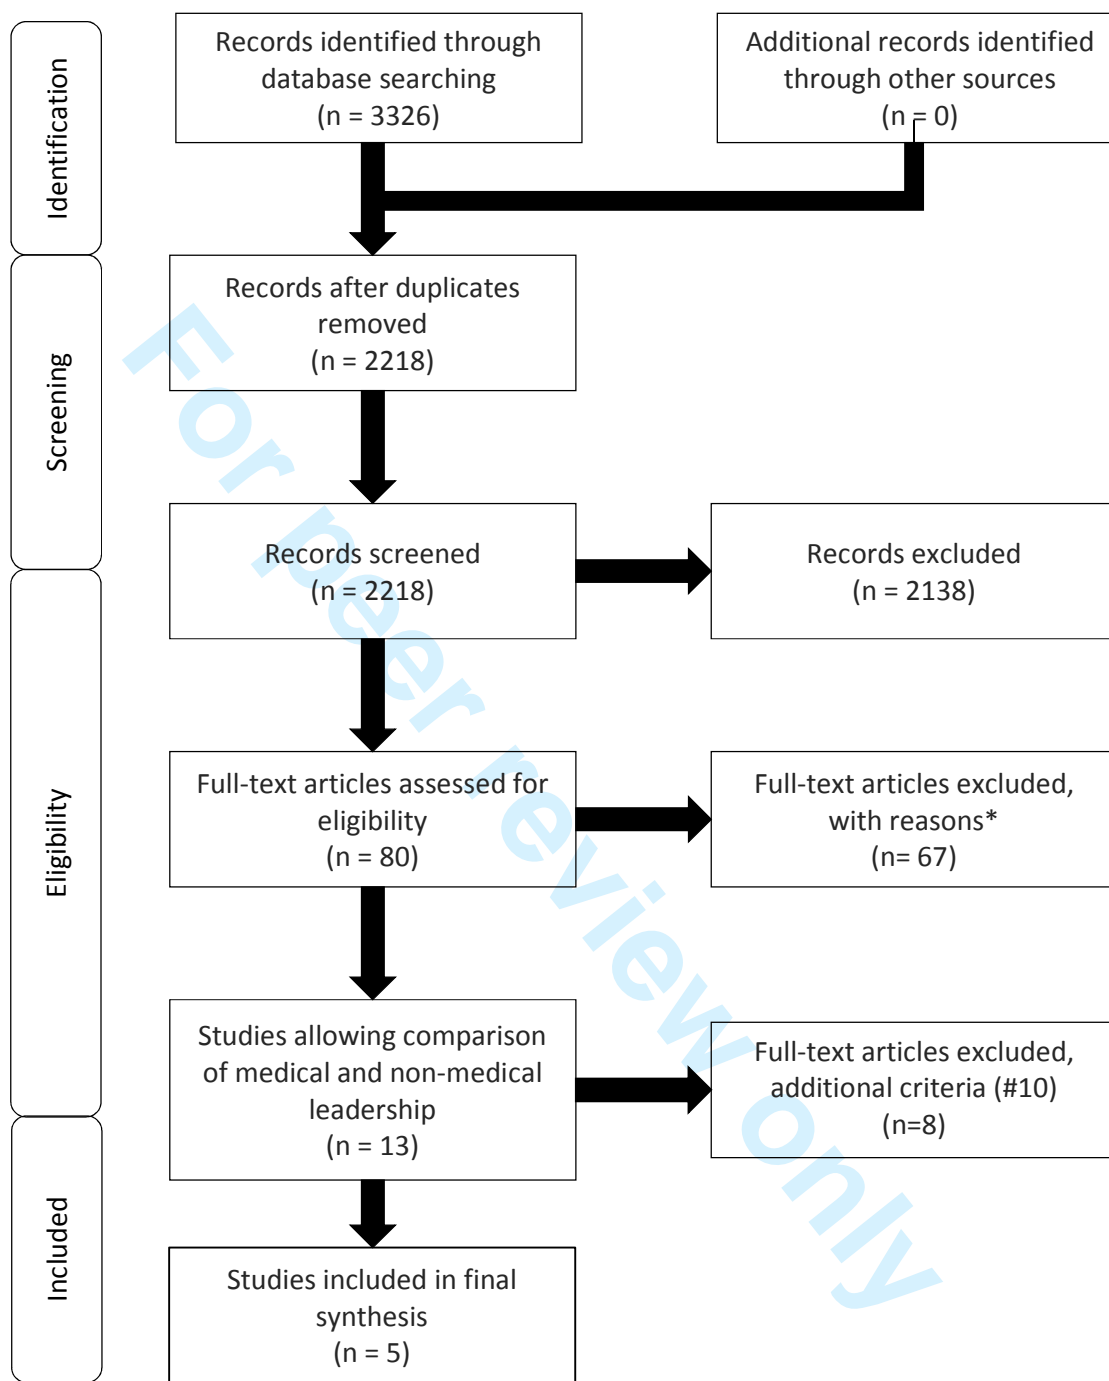

**\*Legends**

| Reason for exclusion           | Number of studies* |
|--------------------------------|--------------------|
| 1 Pre-2005                     | 0                  |
| 2 Other languages              | 0                  |
| 3 Not peer-reviewed literature | 0                  |
| 4 Not healthcare               | 0                  |

|    |                                                                                                  |    |
|----|--------------------------------------------------------------------------------------------------|----|
| 5  | Full-text not available                                                                          | 5  |
| 6  | Not primary research/systematic review                                                           | 4  |
| 7  | Does not include participants who are both doctors or leaders                                    | 17 |
| 8  | Neither medical background/training or leadership is assessed as a variable in the data analysis | 12 |
| 9  | Does not include organisational and/or patient outcomes                                          | 47 |
| 10 | Does not include medical and non-medical leaders in the data analysis                            | 8  |

---

**Figure 1.** Search and review strategy (PRISMA flow diagram)

\*The numbers do not add up to the total number of studies excluded because a proportion of studies were excluded based on multiple criteria.

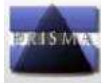

# PRISMA 2009 Checklist

1  
2  
3  
4  
5  
6  
7  
8  
9  
10  
11  
12  
13  
14  
15  
16  
17  
18  
19  
20  
21  
22  
23  
24  
25  
26  
27  
28  
29  
30  
31  
32  
33  
34  
35  
36  
37  
38  
39  
40  
41  
42  
43  
44  
45  
46  
47  
48  
49

| Section/topic                      | #  | Checklist item                                                                                                                                                                                                                                                                                              | Reported on page # |
|------------------------------------|----|-------------------------------------------------------------------------------------------------------------------------------------------------------------------------------------------------------------------------------------------------------------------------------------------------------------|--------------------|
| <b>TITLE</b>                       |    |                                                                                                                                                                                                                                                                                                             |                    |
| Title                              | 1  | Identify the report as a systematic review, meta-analysis, or both.                                                                                                                                                                                                                                         | 1                  |
| <b>ABSTRACT</b>                    |    |                                                                                                                                                                                                                                                                                                             |                    |
| Structured summary                 | 2  | Provide a structured summary including, as applicable: background; objectives; data sources; study eligibility criteria, participants, and interventions; study appraisal and synthesis methods; results; limitations; conclusions and implications of key findings; systematic review registration number. | 3                  |
| <b>INTRODUCTION</b>                |    |                                                                                                                                                                                                                                                                                                             |                    |
| Rationale                          | 3  | Describe the rationale for the review in the context of what is already known.                                                                                                                                                                                                                              | 4-6                |
| Objectives                         | 4  | Provide an explicit statement of questions being addressed with reference to participants, interventions, comparisons, outcomes, and study design (PICOS).                                                                                                                                                  | 6                  |
| <b>METHODS</b>                     |    |                                                                                                                                                                                                                                                                                                             |                    |
| Protocol and registration          | 5  | Indicate if a review protocol exists, if and where it can be accessed (e.g., Web address), and, if available, provide registration information including registration number.                                                                                                                               | NA                 |
| Eligibility criteria               | 6  | Specify study characteristics (e.g., PICOS, length of follow-up) and report characteristics (e.g., years considered, language, publication status) used as criteria for eligibility, giving rationale.                                                                                                      | 7                  |
| Information sources                | 7  | Describe all information sources (e.g., databases with dates of coverage, contact with study authors to identify additional studies) in the search and date last searched.                                                                                                                                  | 6-7                |
| Search                             | 8  | Present full electronic search strategy for at least one database, including any limits used, such that it could be repeated.                                                                                                                                                                               | 6-7                |
| Study selection                    | 9  | State the process for selecting studies (i.e., screening, eligibility, included in systematic review, and, if applicable, included in the meta-analysis).                                                                                                                                                   | 7-9                |
| Data collection process            | 10 | Describe method of data extraction from reports (e.g., piloted forms, independently, in duplicate) and any processes for obtaining and confirming data from investigators.                                                                                                                                  | 7-9                |
| Data items                         | 11 | List and define all variables for which data were sought (e.g., PICOS, funding sources) and any assumptions and simplifications made.                                                                                                                                                                       | 7                  |
| Risk of bias in individual studies | 12 | Describe methods used for assessing risk of bias of individual studies (including specification of whether this was done at the study or outcome level), and how this information is to be used in any data synthesis.                                                                                      | 12-13              |
| Summary measures                   | 13 | State the principal summary measures (e.g., risk ratio, difference in means).                                                                                                                                                                                                                               | NA                 |
| Synthesis of results               | 14 | Describe the methods of handling data and combining results of studies, if done, including measures of consistency (e.g., $I^2$ for each meta-analysis).                                                                                                                                                    | 8                  |

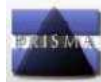

# PRISMA 2009 Checklist

Page 1 of 2

| Section/topic                 | #  | Checklist item                                                                                                                                                                                           | Reported on page # |
|-------------------------------|----|----------------------------------------------------------------------------------------------------------------------------------------------------------------------------------------------------------|--------------------|
| Risk of bias across studies   | 15 | Specify any assessment of risk of bias that may affect the cumulative evidence (e.g., publication bias, selective reporting within studies).                                                             | 12-13              |
| Additional analyses           | 16 | Describe methods of additional analyses (e.g., sensitivity or subgroup analyses, meta-regression), if done, indicating which were pre-specified.                                                         | NA                 |
| <b>RESULTS</b>                |    |                                                                                                                                                                                                          |                    |
| Study selection               | 17 | Give numbers of studies screened, assessed for eligibility, and included in the review, with reasons for exclusions at each stage, ideally with a flow diagram.                                          | 8-9                |
| Study characteristics         | 18 | For each study, present characteristics for which data were extracted (e.g., study size, PICOS, follow-up period) and provide the citations.                                                             | 9-12               |
| Risk of bias within studies   | 19 | Present data on risk of bias of each study and, if available, any outcome level assessment (see item 12).                                                                                                | 12-13              |
| Results of individual studies | 20 | For all outcomes considered (benefits or harms), present, for each study: (a) simple summary data for each intervention group (b) effect estimates and confidence intervals, ideally with a forest plot. | 9-12               |
| Synthesis of results          | 21 | Present results of each meta-analysis done, including confidence intervals and measures of consistency.                                                                                                  | NA                 |
| Risk of bias across studies   | 22 | Present results of any assessment of risk of bias across studies (see Item 15).                                                                                                                          | 12-13              |
| Additional analysis           | 23 | Give results of additional analyses, if done (e.g., sensitivity or subgroup analyses, meta-regression [see Item 16]).                                                                                    | NA                 |
| <b>DISCUSSION</b>             |    |                                                                                                                                                                                                          |                    |
| Summary of evidence           | 24 | Summarize the main findings including the strength of evidence for each main outcome; consider their relevance to key groups (e.g., healthcare providers, users, and policy makers).                     | 13-15              |
| Limitations                   | 25 | Discuss limitations at study and outcome level (e.g., risk of bias), and at review-level (e.g., incomplete retrieval of identified research, reporting bias).                                            | 15                 |
| Conclusions                   | 26 | Provide a general interpretation of the results in the context of other evidence, and implications for future research.                                                                                  | 15                 |
| <b>FUNDING</b>                |    |                                                                                                                                                                                                          |                    |
| Funding                       | 27 | Describe sources of funding for the systematic review and other support (e.g., supply of data); role of funders for the systematic review.                                                               | 15                 |

From: Moher D, Liberati A, Tetzlaff J, Altman DG, The PRISMA Group (2009). Preferred Reporting Items for Systematic Reviews and Meta-Analyses: The PRISMA Statement. PLoS Med 6(6): e1000097. doi:10.1371/journal.pmed1000097

For more information, visit: [www.prisma-statement.org](http://www.prisma-statement.org).

Page 2 of 2

For peer review only - <http://bmjopen.bmj.com/site/about/guidelines.xhtml>

# BMJ Open

## Medical leadership systematic review: Do hospitals and healthcare organisations perform better when led by doctors?

|                                 |                                                                                                                                                                                                                                                                                                                                                                                                                                       |
|---------------------------------|---------------------------------------------------------------------------------------------------------------------------------------------------------------------------------------------------------------------------------------------------------------------------------------------------------------------------------------------------------------------------------------------------------------------------------------|
| Journal:                        | <i>BMJ Open</i>                                                                                                                                                                                                                                                                                                                                                                                                                       |
| Manuscript ID                   | bmjopen-2016-014474.R1                                                                                                                                                                                                                                                                                                                                                                                                                |
| Article Type:                   | Research                                                                                                                                                                                                                                                                                                                                                                                                                              |
| Date Submitted by the Author:   | 17-Jul-2017                                                                                                                                                                                                                                                                                                                                                                                                                           |
| Complete List of Authors:       | Clay-Williams, Robyn; Macquarie University, Australian Institute of Health Innovation<br>Li, Zhicheng; Macquarie University, Australian Institute of Health Innovation<br>Ludlow, Kristiana; Macquarie University, Australian Institute of Health Innovation<br>Testa, Luke; Macquarie University, Australian Institute of Health Innovation<br>Braithwaite, Jeffrey; Macquarie University, Australian Institute of Health Innovation |
| <b>Primary Subject Heading</b>: | Medical management                                                                                                                                                                                                                                                                                                                                                                                                                    |
| Secondary Subject Heading:      | Health services research                                                                                                                                                                                                                                                                                                                                                                                                              |
| Keywords:                       | leadership, HEALTH SERVICES ADMINISTRATION & MANAGEMENT, physician executive, clinician-manager, organisational performance, patient outcomes                                                                                                                                                                                                                                                                                         |
|                                 |                                                                                                                                                                                                                                                                                                                                                                                                                                       |

SCHOLARONE™  
Manuscripts



1 **Title: Medical leadership systematic review: Do hospitals and healthcare organisations perform better**  
2  
3 **when led by doctors?**  
4  
5  
6  
7

8 **Corresponding author:**

9 Robyn Clay-Williams, PhD

10 Australian Institute of Health Innovation

11 Level 6, 75 Talavera Rd Macquarie University, NSW 2109, Australia

12 T: +61 2 9850 2438 | E: [robyn.clay-williams@mq.edu.au](mailto:robyn.clay-williams@mq.edu.au)  
13  
14  
15  
16  
17

18 **Co-authors:**

19 Zhicheng Li, BHsc(Hons)

20 Australian Institute of Health Innovation

21 Macquarie University, Sydney, Australia  
22  
23  
24  
25  
26

27 Kristiana Ludlow, BPsych(Hons)

28 Australian Institute of Health Innovation

29 Macquarie University, Sydney, Australia  
30  
31  
32  
33

34 Luke Testa, MPH

35 Australian Institute of Health Innovation

36 Macquarie University, Sydney, Australia  
37  
38  
39  
40

41 Jeffrey Braithwaite, PhD

42 Australian Institute of Health Innovation

43 Macquarie University, Sydney, Australia  
44  
45  
46  
47  
48

49 **WORD COUNT:** 4,780  
50  
51  
52

53 **KEYWORDS**

54  
55  
56 Leadership, management, physician executive, clinician-manager, organisational performance, board  
57  
58 director, patient outcomes  
59  
60

**ABSTRACT**

**Introduction:** Despite common assumptions that doctors are well placed to lead hospitals and healthcare organisations, the peer-reviewed literature contains little evidence on the performance of doctors in leadership roles in comparison with that of non-medical managers.

**Objectives:** To determine whether there is an association between the leader's medical background and management performance in terms of organisational performance or patient outcomes

**Methods:** We searched for peer-reviewed, English language studies using Medline, Embase and Emerald Management between 2005 and 2017. We included quantitative, qualitative, and mixed method empirical studies on the performance of senior healthcare managers where participants were both doctors and leaders, and where comparative performance data were provided on non-medical leaders. Studies without full-text available, or that did not include organisational, leadership behaviour or patient measures, were excluded.

**Results:** The search, conducted in Medline (n=3,395), Embase (n=1,913) and Emerald Management (n=454) databases, yielded 3,926 entries. After application of inclusion and exclusion criteria, sixteen studies remained. Twelve studies found that there were positive differences between medical and non-medical leaders, and eight studies correlated those findings with hospital performance or patient outcomes. Six studies examined the composition of boards of directors; otherwise there were few common areas of investigation. Five interrelated themes emerged from a narrative analysis: the impact of medical leadership on outcomes; physicians on boards; contribution of qualifications and experience; the medical leader as an individual or part of a team; and doctors transitioning into the medical leadership role.

**Discussion and conclusion:** A modest body of evidence supports the importance of including physicians on organisational governing boards. Despite many published articles on the topic of whether hospitals and healthcare organisations perform better when led by doctors, there were few empirical studies that directly compared the performance of medical and non-medical managers. This is an under-researched area that requires further funding and focus.

### Strengths and limitations of this study

- To the best of our knowledge, this is the first systematic review of the literature published over the last decade to determine whether healthcare leaders who are doctors perform better than those with non-medical backgrounds in terms of organisational performance or patient outcomes
- We developed robust search strategies and a rigorous reviewing process with the aim to minimise bias and ensure the objectiveness and transparency of the systematic review
- A modest body of evidence supports the importance of including physicians in the composition of governing boards to improve organisational performance
- There were insufficient studies meeting inclusion criteria to enable our research question to be fully answered

## INTRODUCTION

### Rationale

Prior to the 1970s, doctors very often ran hospitals<sup>1 2</sup> and administrators played a subordinate, coordination, rather than a leadership, role. As healthcare moved towards a more business-bureaucratic<sup>3</sup> model of practice, administrators were engaged to manage general organisational-operational business performance, but doctors continued to expend substantial resources and manage the major decisions affecting patient care. In 1983, the Griffiths Report<sup>4</sup> was released in the UK, paving the way for the introduction of a new purchaser-provider model of healthcare. In the USA, the idea which became known as clinical directorates was established.<sup>5</sup> The Medical Director role and clinical directorates became more widely established, and over time enabled more senior managers to have greater control over resources. Doctors did not always consider such roles attractive,<sup>5</sup> but felt that they needed to take up these part-time appointments in order to continue to partake in decisions affecting

1 their work. In the 1990s, when managed care was established in the USA,<sup>6</sup> new drivers emerged as  
2  
3 physicians moved from part-time advisory roles into full-time management in order to contribute to  
4  
5 running healthcare organisations, secure greater control over resource allocation and participate in  
6  
7 senior decision-making.  
8  
9

10  
11 Today, physicians are well-established in management roles, with the first survey of Accountable Care  
12  
13 Organisations (ACOs) in the USA finding that by 2014, 51% were led by doctors.<sup>7</sup> Within hospitals and  
14  
15 other healthcare organisations, medical departments are normally led by doctors, and report to the  
16  
17 Medical Director (or equivalent) who is typically a member of the executive team (see Dwyer<sup>8</sup> for a  
18  
19 literature-based review on the roles of medical managers). By the turn of the 21<sup>st</sup> century in the USA,  
20  
21 50% of physician executives no longer practiced medicine,<sup>6</sup> and physician executives began to gain  
22  
23 acceptance as administrators of managed care institutions.<sup>9 10</sup> In the UK<sup>2 11</sup> (and elsewhere<sup>11 12</sup>), where  
24  
25 the culture was historically less well disposed to accepting doctors who relinquish their clinical work,<sup>13</sup>  
26  
27 the majority of medical executives today act as ‘hybrid managers’, who continue to manage a clinical  
28  
29 workload alongside their management responsibilities. In the UK National Health Service (NHS), where  
30  
31 doctors hold positions of power within healthcare organisations that enable them to confound  
32  
33 managerial decisions, enhancing medical engagement in leadership is seen as a factor that may  
34  
35 contribute to improved organisational performance.<sup>11</sup> Benefits to employing doctors in healthcare  
36  
37 management roles may include bottom-up leadership, greater political influence, and improved  
38  
39 communications between doctors and senior management.<sup>14</sup> Current focus on engaging doctors in  
40  
41 leadership centres on efforts to link clinical decisions with those of strategic management, and has  
42  
43 broadened to include key accountabilities for quality of care in addition to resource management.<sup>15</sup>  
44  
45 Today’s leaders in healthcare perform many tasks. For this review, we have adopted the King’s Fund  
46  
47 description of the healthcare leadership task: “to ensure direction, alignment and commitment within  
48  
49 teams and organisations”.<sup>16, p2</sup> This task may incorporate elements of leadership, management and  
50  
51 administration.  
52  
53  
54  
55  
56  
57  
58  
59  
60

1 Despite the prevalence of physician executives occupying leadership roles in health systems, we do not  
2 know to what extent prior medical training or experience as a physician affects the performance of  
3 healthcare executives. Research questions include: Do healthcare executives who are doctors perform  
4 better than those who are not; and, if so, in what ways do they perform better? What is it about a  
5 physician that might enhance their leadership ability: medical training, experience in the physician role,  
6 or something else? Is it important for organisational performance to have doctors as members of the  
7 executive leadership team, and if so, why?

8 Previous research has found no difference in performance between medical and non-medical  
9 managers;<sup>17-19</sup> however, opinion on the topic of 'which profession should manage hospitals' is prevalent  
10 and polarised. There appears to be a view that the physician mindset is different to that of the general  
11 healthcare manager.<sup>20 21</sup> Arguing against the benefits of medical leadership, papers cite doctors' over-  
12 identification with their professional clinical role, tendency to be conservative individualists rather than  
13 team players, lack of formal management training, and their purported weaknesses in financial  
14 management and organisational strategy.<sup>12 22-24</sup>

15 However, doctors prefer to be led by doctors,<sup>11</sup> and articles in favour of medical leadership cite doctors'  
16 strengths in addressing patient outcomes, quality and safety issues, decision-making, ability to  
17 specialise, and intelligence. A recent study surveying doctors' reactions to hospital reform found that  
18 doctors who were also leaders reacted more positively to hospital reform than those who spent most of  
19 their time caring for patients.<sup>25</sup> Clearly, the question 'do hospitals and healthcare organisations perform  
20 better when led by doctors?', particularly in relation to the leadership structures of modern healthcare  
21 systems, has not been settled.

## 22 Objectives

23 This study presents the results of a systematic review of the literature published since 2005 on medical  
24 leadership. We sought contemporary evidence on the leadership performance of executives or senior  
25 managers who were also doctors. The objective of the review was to determine whether there is an

1 association between whether the leader has a medical background and management performance in  
2 terms of organisational performance or patient outcomes, and was framed by the research question: Do  
3 hospitals and healthcare organisations perform better when led by doctors? To enable us to objectively  
4 answer our question, and to minimise the confounders associated with comparisons in healthcare, we  
5 sought quantitative, qualitative and mixed method empirical studies reporting on leadership  
6 performance that included medical and non-medical leaders in the same setting.  
7  
8  
9  
10  
11  
12  
13

## 14 15 16 17 **METHODS**

### 18 **Eligibility criteria**

#### 19 *Types of participants*

20 We included empirical studies on senior managers in healthcare organisations that involved participants  
21 who were both doctors and leaders, and participants who were non-medical leaders. Non-medical  
22 leaders included those who had a clinical background other than medicine (e.g., nurses, allied health  
23 professionals) and those who did not have a clinical background.  
24  
25  
26  
27  
28  
29  
30  
31  
32

#### 33 *Types of outcomes*

34 After examining the literature, we included three types of outcome measures. These were: (1) patient  
35 measures, e.g., patient outcomes, or processes of care; (2) organisational measures, e.g., staffing,  
36 finance, or hospital ratings; and (3) leadership behaviour measures, e.g., management processes,  
37 teamwork, or decision-making.  
38  
39  
40  
41  
42  
43  
44  
45  
46  
47

### 48 **Information sources**

49 We searched for peer-reviewed, English language studies using three academic databases; Medline,  
50 Embase and Emerald Management. The search was limited to empirical research published between 1<sup>st</sup>  
51 January 2005 and 7th June 2017.  
52  
53  
54  
55  
56  
57  
58  
59  
60

### **Search**

The search was designed, in collaboration with a professional research librarian, to capture both the executive leadership and the medical practitioner role. Seven terms were included for executive leadership and linked using the Boolean operator OR to maximise the sensitivity of the search: “executive”, “leader”, “leadership”, “manager”, “director”, “CEO”, or “board”. For the role of medical practitioner, terms including “physician”, “clinician”, and “doctor” are used sometimes interchangeably in literature. Thus we searched for all three terms using the OR operator. The searches were combined, and refined using a proximity operator. Full search strategies are presented in Table 1.

**Table 1. Medline, Embase and Emerald Management search strategies**

| Database        | Medline                                                                                                                                                                              | Results        |
|-----------------|--------------------------------------------------------------------------------------------------------------------------------------------------------------------------------------|----------------|
| <b>Strategy</b> | <b>Searches</b>                                                                                                                                                                      | <b>Results</b> |
| #1              | ((executive\$ or leader\$ or leadership\$ or manager\$ or director\$ or CEO\$ or board\$) adj3 (physician\$ or doctor\$ or clinician\$)).ab.                                         | 4,158          |
| #2              | Limit #1 to (English language and yr=“2005 - Current”)                                                                                                                               | 2,037          |
| #3              | *Physician Executives/                                                                                                                                                               | 4,069          |
| #4              | Limit #3 to (English language and yr=“2005 - Current”)                                                                                                                               | 1,461          |
| #5              | #2 or #4                                                                                                                                                                             | 3,395          |
| Database        | Embase                                                                                                                                                                               | Results        |
| <b>Strategy</b> | <b>Searches</b>                                                                                                                                                                      | <b>Results</b> |
| #1              | ((executive\$ or leader\$ or leadership\$ or manager\$ or director\$ or CEO\$ or board\$) adj3 (physician\$ or doctor\$ or clinician\$)).ab.                                         | 5,766          |
| #2              | Limit #1 to (English language and yr=“2005 - Current” and article)                                                                                                                   | 1,913          |
| Database        | Emerald Management                                                                                                                                                                   | Results        |
| <b>Strategy</b> | <b>Searches</b>                                                                                                                                                                      | <b>Results</b> |
|                 | ((executive* or leader* or leadership* or manager* or director* or CEO* or board*) and (physician* or doctor* or clinician*)).ab. Limit publication date to January 2005 - June 2017 | 454            |

### Study selection

Search results were aggregated and imported to an EndNote library, and duplicate entries were removed. Pairs of reviewers (RCW:LT; KL:ZL) cross-checked 110 (approximately 3%) citation titles and abstracts in a double review in order to establish inter-rater reliability. Articles were excluded based on the following criteria: pre-2005; language other than English; non-peer-reviewed literature; setting other than healthcare; non-primary research including systematic reviews; and does not include

1 participants who are both doctors or leaders. Any discrepancies between the reviewers were discussed  
2  
3 until a consensus was reached. The remaining citations were randomly assigned to the four reviewers  
4  
5 who independently assessed titles and abstracts against the exclusion criteria, with regular discussions  
6  
7 held at team meetings. While we did not include literature reviews, the reference section of any review  
8  
9 identified was searched for additional papers that might meet inclusion criteria. The selected articles  
10  
11 were then subject to a full-text review where further criteria were added to the exclusion criteria: full-  
12  
13 text unavailable; neither medical background/training or leadership is assessed as a variable in the data  
14  
15 analysis; does not include organisational and/or patient outcomes.  
16  
17  
18  
19  
20  
21

### 22 **Data collection process and data items**

23  
24 Data from the included studies were extracted into a locally developed form for analysis. Elements  
25  
26 extracted were: a) the full reference, b) location, c) language, d) period of data collection, e) study type,  
27  
28 f) study primary and secondary aims, g) exclusion criteria, h) data: total number of organisations, type of  
29  
30 organisations, data types and sources used to performance and/or outcomes, methodological/statistical  
31  
32 approach to identify performance and/or outcomes, i) methods: methods used to study  
33  
34 contextual/success factors associated with medical leaders (e.g., interview, survey, observation),  
35  
36 participants, and data analysis methods, j) findings: quantitative results and qualitative results or  
37  
38 contextual factors most important for explaining relationship between medical background of leader  
39  
40 and performance, and k) implications.  
41  
42  
43  
44  
45  
46  
47

### 48 **Risk of bias**

49  
50 Risk of bias within studies was assessed using criteria developed by Hawker, et al.<sup>26</sup> Ratings were  
51  
52 assigned (poor, fair, good) across nine different categories: 1) abstract and title, 2) introduction and  
53  
54 aims, 3) method and data, 4) sampling, 5) data analysis, 6) ethics and bias, 7) results, 8) transferability or  
55  
56 generalisability, 9) implications and usefulness. Risk of bias potentially affecting the cumulative evidence  
57  
58  
59  
60



1 across studies was determined by examining study methods, ethics committee approvals, study funding,  
2  
3 and authors' conflicts of interest.  
4  
5  
6  
7

## 8 **Synthesis of results**

9  
10 Results were analysed through a narrative synthesis of extracted data. Extracted data were coded and  
11  
12 organised to explore connections between data elements and to develop sets of concepts. Segments of  
13  
14 data were then linked in a formal fashion, to determine relationships that may exist between different  
15  
16 data elements and allow themes to emerge.  
17  
18  
19  
20

## 21 **RESULTS**

### 22 **Study selection**

23  
24  
25 The search results and review process are presented in Figure 1 using the Preferred Reporting Items for  
26  
27 Systematic Review and Meta-analyses (PRISMA) flow chart. The search performed on Medline  
28  
29 (n=3,395), Embase (n=1,913) and Emerald Management (n=454) yielded a total of 3,926 articles after  
30  
31 the removal of 1,849 duplicates. During the 3% double-review, the reviewing pairs (KL and ZL pair 1,  
32  
33 RCW and LT pair 2) reviewed 110 citations each. To test inter-rater reliability, we used Cohen's Kappa  
34  
35 and found high levels of agreement between the paired reviewers,  $K=.78$  ( $p<.0001$ ) for pair 1 and  $K=.88$   
36  
37 ( $p<.0001$ ) for pair 2. The remaining screening of title and abstract resulted in 113 studies eligible for full-  
38  
39 text review. The full-text review stage lead to the inclusion of 24 quantitative, qualitative or mixed  
40  
41 method studies in the penultimate pool. After the additional exclusion criterion was added, allowing for  
42  
43 a comparison of medical and non-medical leadership, ten more studies were eliminated. The literature  
44  
45 search identified five literature reviews on topics associated with medical leadership.<sup>8 14 27-29</sup> The  
46  
47 references of these five reviews were searched for additional studies that met inclusion criteria. Two  
48  
49 additional studies were identified as a result of this process, resulting in a final inclusion of 16 studies.  
50  
51  
52  
53  
54  
55  
56  
57  
58  
59

### 60 **Study characteristics**

1 The characteristics of the 16 studies that met inclusion criteria are presented in Supplementary Table 1.  
2  
3 Fourteen studies conducted quantitative analysis: ten studies analysed questionnaire survey data;<sup>7 30-38</sup>  
4  
5 one study (Jiang et al.<sup>32</sup>) also provided processes of care data, and another provided hospital  
6  
7 performance data (Saleh et al.<sup>37</sup>). Two studies analysed US Statewide Health Planning and Development  
8  
9 data from California,<sup>39 40</sup> one study analysed data from the AMADEUS database and hospital and  
10  
11 insurance documents,<sup>41</sup> and one study analysed UK hospital trust data.<sup>42</sup> One study conducted a  
12  
13 qualitative analysis of interview and observation data,<sup>43</sup> and another study conducted a mixed method  
14  
15 analysis,<sup>44</sup> which combined findings from a review of hospital documents with qualitative analysis of  
16  
17 interviews with hospital CEOs and board members. Seven studies were from the USA; the remainder  
18  
19 were from Finland (2), Germany (2), the UK (1) Ireland (1), Norway (1), Lebanon (1) and Australia (1).  
20  
21  
22  
23  
24  
25  
26

### 27 **Results of individual studies**

28  
29 Six studies reported on the performance of hospital boards.<sup>32 39-42 44</sup> Veronesi et al.<sup>42</sup> examined the  
30  
31 impact of clinicians appointed to the boards of 102 English NHS hospital trusts on quality of hospital  
32  
33 care provided from 2006 to 2009. Composition of boards was determined from hospital trust annual  
34  
35 reports. Compliance with health and well-being, clinical effectiveness, safety and patient focus, and ease  
36  
37 and equity of access care standards was obtained from the UK Healthcare Commission and Dr Foster (a  
38  
39 commercial provider of healthcare benchmarking). A greater percentage of doctors on boards was  
40  
41 associated with a better-quality rating of service providers. Trusts achieving a four rating had an average  
42  
43 of 15.01% of directors with a medical background, whereas in trusts achieving only a one rating, 11.09%  
44  
45 board directors were physicians. This finding was confirmed in relation to lower morbidity rates and  
46  
47 tests to exclude the possibility of reverse causality, whereby doctors joined the boards of better  
48  
49 performing trusts. No equivalent association was found for clinical professions such as nurses and other  
50  
51 allied health professions.  
52  
53  
54  
55  
56

57 De Andrade<sup>40</sup> investigated whether having board members with medical expertise in 281 USA hospitals  
58  
59 affected the levels of uncompensated care provided. A quantitative analysis of data from the California  
60

1 Office of Statewide Health Planning and Development between 1997 and 2010 found that physician  
2 board membership was not related to provision of uncompensated care, except when the hospital's  
3 ownership status was taken into account. Relative to non-profit and public hospitals, for-profit hospitals  
4 provided more uncompensated care the higher the percentage of physicians on the board. For an  
5 average for-profit board size, which has ten members, substituting one member by a physician  
6 increased the amount of uncompensated care provided by 19%.

7  
8  
9  
10  
11  
12  
13  
14 On this theme of boards, Prybil<sup>44</sup> sought to determine whether high-performing and mid-range hospitals  
15 differ in board structures, processes, and practices. High performance hospitals included at least three  
16 of the Solucient Center for Healthcare Improvement's '100 Top Hospitals' in 1999-2003. A mixed  
17 method analysis of hospital documents and interviews with hospital CEOs and board members was  
18 conducted for seven matched pairs of USA hospitals, and found that physicians form a larger  
19 component of the boards of high performing hospitals (30.3%) than of midrange hospitals (20.8%).  
20 Doctors comprised 25% or more of the boards' voting members in five of the seven high performing  
21 hospitals, but only one midrange hospital.

22  
23  
24  
25  
26  
27  
28  
29  
30  
31  
32  
33 Jiang et al.<sup>32</sup> examined whether differences exist in quality performance of 490 USA hospitals in relation  
34 to adoption of particular practices in board oversight of quality. Data consisted of 1) a survey of 562  
35 hospital CEOs on board practices, (2) process of care measures for three clinical conditions (heart attack,  
36 heart failure, pneumonia), and (3) outcomes measures, consisting of risk adjusted mortality rates, for  
37 the same three conditions. Sixty percent of participating hospitals had a Chief Medical Officer or Vice  
38 President of Medical Affairs on the committee; this resulted in significantly higher process of care scores  
39 (85.3% vs 81.0%,  $p < 0.05$ ) and lower risk adjusted mortality rates (5.6% vs 7.3%,  $p < 0.05$ ) than hospitals  
40 that did not have a Chief Medical Officer or Vice President of Medical Affairs as a committee member.  
41 Eighty three percent of participating hospitals had medical staff on the committee; this resulted in  
42 significantly higher process of care scores (84.2% vs 80.9%,  $p < 0.05$ ) but no difference in risk adjusted  
43 mortality rates. Sixty three percent of participating hospitals had a clinical board member on the  
44  
45  
46  
47  
48  
49  
50  
51  
52  
53  
54  
55  
56  
57  
58  
59  
60

1 committee; this resulted in no difference in process of care scores but significantly lower risk-adjusted  
2 mortality rates (5.7% vs 7.2%,  $p < 0.05$ ).  
3

4  
5 Bai and Krishnan<sup>39</sup> examined whether hospitals without physician participation on their boards of  
6 directors delivered lower quality of care in 142 non-profit hospitals in the USA. Quantitative data were  
7 obtained from the US Hospital Quality Alliance and the California Office of Statewide Health Planning  
8 and Development. The study found that boards without physician members were associated with a  
9 decrease of three to five percentage points in quality of care for heart failure, pneumonia, and surgery  
10 infection prevention.  
11

12  
13 Moving to Germany, Kuntz et al.<sup>41</sup> examined differences in the financial performance of hospitals with  
14 regard to ownership by studying the size and composition of supervisory boards in 175 hospital  
15 companies operating 246 hospitals (14% of all German acute care hospitals in 2009). The study reported  
16 on a quantitative analysis of hospital financial performance data (from the AMADEUS database) and  
17 information on hospital and board characteristics (from business and quality reports, hospital websites  
18 and health insurers). Data were obtained from all participants in 2009, and from a subsample of 163  
19 hospital companies in 2010. Financial performance was based on four measures: return on assets (ROA),  
20 earnings before interest and tax (EBIT) margin, total profit margin, and net income. Physicians  
21 comprised, on average, 11.7% board members. Financial performance, and board size and composition  
22 depended on ownership ( $p < .01$  for ROA and  $p < .001$  for the other four performance measures). An  
23 increase in board size and greater political participation were negatively associated with all five tested  
24 measures of financial performance, an increase in nurse and economist participation was negatively  
25 associated with financial performance, and no associations were found for clerical participation. An  
26 increase in physician participation, however, was positively associated with a 5% increase in ROA ( $p =$   
27 .061).  
28  
29  
30  
31  
32  
33  
34  
35  
36  
37  
38  
39  
40  
41  
42  
43  
44  
45  
46  
47  
48  
49  
50  
51  
52  
53

54  
55  
56 Two studies reported on physicians' involvement in strategic decision making.<sup>36 37</sup> Parayitam et al.<sup>36</sup>  
57 examined the self-reported outcomes of decisions when physician executives were involved in strategic  
58  
59  
60

1 decision-making (SDM) processes in 109 USA hospitals. Hypotheses were that increased numbers of  
2  
3 physicians involved in strategic decision-making teams would be associated with better decisions,  
4  
5 greater understanding of the rationale of decisions, and more commitment to decisions. 114 CEOs and  
6  
7 254 strategic decision makers (executive officers, director of human resources, chief technical offices,  
8  
9 chiefs of staff, personnel involved in facilities, maintenance) completed a survey reporting their decision  
10  
11 quality, understanding, and commitment. Structural equation modelling of the data suggested that the  
12  
13 ratio of physicians was positively correlated with decision understanding, commitment and quality.  
14  
15 Saleh et al.<sup>37</sup> explored the use of strategic planning processes in 79 (56.4%) Lebanese hospitals, and  
16  
17 investigated its association with financial performance. Hypotheses included that the level of physician  
18  
19 involvement in the strategic planning process is positively associated with hospital performance.  
20  
21 Quantitative analysis of survey data on hospital-reported participation in strategic planning processes,  
22  
23 and hospital performance data from the Lebanese Ministry of Public Health (occupancy rate and  
24  
25 revenue-per-bed) found that there was no association between the level of physician involvement in the  
26  
27 strategic planning process and hospital outcomes; generally, physician involvement was low (4.1 out of  
28  
29 a possible score of 7).

30  
31  
32  
33  
34  
35  
36  
37 Two studies reported on medical leadership of organisations.<sup>7,31</sup> In the USA, Colla et al.<sup>7</sup> measured how  
38  
39 doctor-led organisations compared with other Accountable Care Organisations (ACOs) in terms of  
40  
41 structure, size and care provided, and explored the degree of doctor engagement in managing ACOs.  
42  
43 ACOs are groups of providers that are jointly responsible for caring for a nominated population of  
44  
45 patients. Fifty one percent of the 173 ACOs in the study self-identified as physician-led, 33% as jointly  
46  
47 led by hospital and physician, and the remainder were led by hospitals or other entities. Doctor-led  
48  
49 ACOs were found to be more likely to have advanced IT capabilities and better outpatient care than  
50  
51 non-doctor-led ACOs, and were more likely to measure and report financial performance at practice and  
52  
53 clinicians levels; however this finding was confounded by the fact that physician-led ACOs are less likely  
54  
55 to include hospitals and more likely to include physician groups. Performance of ACOs was not assessed,  
56  
57  
58  
59  
60

1 therefore it was not possible to determine whether performance was related to whether leaders were  
2  
3 doctors or non-medical managers.  
4

5 Goodall<sup>31</sup> examined the relationship between hospital performance and whether the Chief Executive  
6  
7 Officer (CEO) was a doctor or a non-medical manager. Hospital performance was determined by media-  
8  
9 generated league tables, produced by US News and World Report's (USNWR) 'Best Hospitals' in 2009.  
10  
11 Three hundred healthcare executives from three specialties (cancer, digestive disorders, heart and heart  
12  
13 surgery) were surveyed in the top 100 USA hospitals. Positive association was found between physician  
14  
15 CEOs and hospital performance for all three hospital specialties ( $p < 0.001$ ). While higher performing  
16  
17 hospitals were associated with physician CEOs, causation was not able to be determined (e.g., higher  
18  
19 performing hospitals may just prefer to have physicians as leaders).  
20  
21  
22  
23

24 Five studies reported on physician leadership within organisations.<sup>30 33 34 38 43</sup> Konu and Viitanen<sup>33</sup>  
25  
26 investigated the incidence of shared leadership among 433 middle-level managers (e.g., chief  
27  
28 physicians, nursing directors) in social service and healthcare in Finland. Quantitative analysis of survey  
29  
30 data on leadership practices found that shared leadership practices were more common among  
31  
32 managers without a medical background.  
33  
34

35  
36 Another study sought to determine whether evaluations on the impact of knowledge sources affecting  
37  
38 their decision-making differ depending on the manager's professional background, activity sector,  
39  
40 gender, management experience, or age, among 404 middle-level social and healthcare managers in a  
41  
42 Finnish hospital (Simonen et al<sup>38</sup>). Quantitative analysis of survey data revealed that doctor managers  
43  
44 more strongly perceived that their decision-making was influenced by their own professional  
45  
46 experience, journals and scientific research within their own professional field, and nationwide  
47  
48 interaction within their own profession. Differences were found between doctor managers and nurse  
49  
50 managers with respect to organization documents and publications, which carried more weight in nurse  
51  
52 managers' decision-making. No differences were found between managers of different professional  
53  
54 backgrounds regarding other knowledge sources.  
55  
56  
57  
58  
59  
60

1 In other work, Agarwal et al.<sup>30</sup> sought to determine whether there is a positive association between  
2  
3 Management Practices Score (MPS) and the level of clinical education of managers in 42 Australian  
4  
5 acute care public hospitals. The MPS for each hospital was calculated from interview responses of 116  
6  
7 managers to a survey of 21 hospital management practices across multiple dimensions. The study found  
8  
9 no association between the number of doctors in each hospital and the MPS ( $p=0.779$ ). The coefficient  
10  
11 on the level of skills and education within hospitals, however, was positive and significant ( $p=0.06$ ),  
12  
13 indicating that hospitals with a higher proportion of clinically qualified and skilled managers perform  
14  
15 significantly better in management practices.  
16  
17

18  
19 Spehar et al.<sup>43</sup> investigated how clinicians' professional background influences their transition into the  
20  
21 managerial role and identity as clinical managers in four public hospitals and two health trusts in  
22  
23 Norway. Interviews were conducted with 30 clinician managers (13 doctors), 20 of these were also  
24  
25 observed in management and staff meetings during the day. Qualitative analysis of interview and  
26  
27 observation data revealed that doctors experienced difficulties in reconciling the clinical and  
28  
29 management role and used clinical work to gain legitimacy and respect from medical colleagues. In  
30  
31 contrast, nurses experienced a faster and more positive transition into the manager role, and were  
32  
33 more fully engaged in the managerial aspects of the role.  
34  
35  
36

37  
38 Moving countries again, Kuntz et al.<sup>34</sup> assessed the relationship between the amount of medical  
39  
40 involvement in leadership and staff-to-patient ratios. The study was conducted in Germany, where  
41  
42 hospitals are managed by an executive leadership team consisting of a commercial director, medical  
43  
44 director and nursing director. The study was controlled for the size and case mix of the 604 participating  
45  
46 hospitals, whether they were public or private, the degree to which they were rural, and whether the  
47  
48 doctors were salaried or contracted. High staff-to-patient ratios for both nurses and doctors are  
49  
50 associated with better hospital performance.<sup>45 46</sup> The study found a relationship between full-time  
51  
52 Medical Director (MD) or heavily involved part-time MD and a higher staff-to-patient ratio. Full time  
53  
54 MDs significantly improved the staff-to-patient ratios for both doctors and nurses (physicians 1.96,  
55  
56  $p<0.01$ ; nurses: 4.44,  $p<0.01$ ), whereas part-time MDs only improved the staff-to-patient ratios for  
57  
58  
59  
60

doctors (e.g., an increase of part-time involvement from 15 to 25%, resulted in an increase of 2.49 physicians per thousand inpatients).

Staying in Europe, O'Keefe<sup>35</sup> measured and compared risk aversion in 788 Irish clinicians, clinical managers, non-clinical managers, and non-clinical public representatives, in terms of willingness to discharge a patient from the Emergency Department (ED). The study found no significant difference between clinicians and clinician managers, but found significant differences between clinicians and non-clinicians (including between clinical and non-clinical managers), with the non-clinical participants being more risk averse. Limitations included: (1) there was a large variation in risk tolerance, even between clinicians, (2) it was a single study in a single country, and (3) clinicians are likely to be more familiar both with actual events depicted in the scenarios, and also with the process of making treatment choices that may result in death. The study did not provide indication of an objectively appropriate level of risk, but the authors suggested that the clinicians had a more pragmatic approach to decision-making.

### Risk of bias

While studies were generally well-designed and executed, generalisability and implications, and usefulness of the findings was low (Table 2).<sup>26</sup> There is a moderate risk of bias across studies. The majority (12) studies collected self-reported data on aspects of medical management, e.g., surveys or interviews, rather than objective data. Ethics approval was not reported for the studies, and publications did not report study funding or authors' conflicts of interests.

**Table 2. Methodology rigour and risk of bias**

| Study                                 | Abstract and title | Introduction and aims | Method and data | Sampling | Data analysis | Ethics and bias | Findings | Generalisability | Implications and usefulness |
|---------------------------------------|--------------------|-----------------------|-----------------|----------|---------------|-----------------|----------|------------------|-----------------------------|
| Agarwal et al. (2016) <sup>30</sup>   | Good               | Good                  | Good            | Fair     | Fair          | Good            | Good     | Fair             | Good                        |
| Bai and Krishnan (2015) <sup>39</sup> | Fair               | Good                  | Good            | Good     | Good          | Fair            | Good     | Fair             | Good                        |



|    |                                        |      |      |      |      |           |           |      |      |      |
|----|----------------------------------------|------|------|------|------|-----------|-----------|------|------|------|
| 1  | Colla et al. (2014) <sup>7</sup>       | Fair | Fair | Good | Good | Poor      | Poor      | Good | Good | Fair |
| 2  |                                        |      |      |      |      |           |           |      |      |      |
| 3  | De Andrade (2014) <sup>40</sup>        | Fair | Good | Good | Good | Good      | Fair      | Good | Fair | Good |
| 4  |                                        |      |      |      |      |           |           |      |      |      |
| 5  | Goodall (2011) <sup>31</sup>           | Fair | Fair | Fair | Poor | Fair      | Poor      | Fair | Poor | Poor |
| 6  |                                        |      |      |      |      |           |           |      |      |      |
| 7  | Jiang et al. (2009) <sup>32</sup>      | Fair | Fair | Fair | Fair | Fair      | Fair      | Fair | Fair | Fair |
| 8  |                                        |      |      |      |      |           |           |      |      |      |
| 9  | Konu and Viitanen (2008) <sup>33</sup> | Good | Good | Good | Good | Good      | Very poor | Good | Fair | Fair |
| 10 |                                        |      |      |      |      |           |           |      |      |      |
| 11 | Kuntz et al. (2013) <sup>34</sup>      | Fair | Good | Good | Good | Good      | Good      | Good | Fair | Fair |
| 12 |                                        |      |      |      |      |           |           |      |      |      |
| 13 | Kuntz et al. (2016) <sup>41</sup>      | Good | Good | Good | Good | Good      | Fair      | Good | Fair | Fair |
| 14 |                                        |      |      |      |      |           |           |      |      |      |
| 15 | O'Keefe (2015) <sup>35</sup>           | Good | Fair | Fair | Good | Good      | Good      | Fair | Fair | Poor |
| 16 |                                        |      |      |      |      |           |           |      |      |      |
| 17 | Parayitam et al. (2007) <sup>36</sup>  | Good | Good | Good | Good | Good      | Fair      | Good | Fair | Good |
| 18 |                                        |      |      |      |      |           |           |      |      |      |
| 19 | Prybil (2006) <sup>44</sup>            | Fair | Good | Fair | Fair | Fair      | Fair      | Fair | Fair | Fair |
| 20 |                                        |      |      |      |      |           |           |      |      |      |
| 21 | Saleh et al. (2013) <sup>37</sup>      | Good | Fair | Good | Good | Good      | Fair      | Good | Fair | Fair |
| 22 |                                        |      |      |      |      |           |           |      |      |      |
| 23 | Simonen et al. (2009) <sup>38</sup>    | Good | Good | Good | Good | Good      | Fair      | Good | Fair | Fair |
| 24 |                                        |      |      |      |      |           |           |      |      |      |
| 25 | Spehar et al. (2015) <sup>43</sup>     | Fair | Fair | Good | Good | Good      | Good      | Good | Good | Fair |
| 26 |                                        |      |      |      |      |           |           |      |      |      |
| 27 | Veronesi et al. (2013) <sup>42</sup>   | Fair | Good | Good | Good | Very Good | Good      | Good | Good | Good |
| 28 |                                        |      |      |      |      |           |           |      |      |      |
| 29 |                                        |      |      |      |      |           |           |      |      |      |
| 30 |                                        |      |      |      |      |           |           |      |      |      |
| 31 |                                        |      |      |      |      |           |           |      |      |      |
| 32 |                                        |      |      |      |      |           |           |      |      |      |
| 33 |                                        |      |      |      |      |           |           |      |      |      |
| 34 |                                        |      |      |      |      |           |           |      |      |      |
| 35 |                                        |      |      |      |      |           |           |      |      |      |
| 36 |                                        |      |      |      |      |           |           |      |      |      |
| 37 |                                        |      |      |      |      |           |           |      |      |      |
| 38 |                                        |      |      |      |      |           |           |      |      |      |
| 39 |                                        |      |      |      |      |           |           |      |      |      |
| 40 |                                        |      |      |      |      |           |           |      |      |      |
| 41 |                                        |      |      |      |      |           |           |      |      |      |
| 42 |                                        |      |      |      |      |           |           |      |      |      |
| 43 |                                        |      |      |      |      |           |           |      |      |      |
| 44 |                                        |      |      |      |      |           |           |      |      |      |
| 45 |                                        |      |      |      |      |           |           |      |      |      |
| 46 |                                        |      |      |      |      |           |           |      |      |      |
| 47 |                                        |      |      |      |      |           |           |      |      |      |
| 48 |                                        |      |      |      |      |           |           |      |      |      |
| 49 |                                        |      |      |      |      |           |           |      |      |      |
| 50 |                                        |      |      |      |      |           |           |      |      |      |
| 51 |                                        |      |      |      |      |           |           |      |      |      |
| 52 |                                        |      |      |      |      |           |           |      |      |      |
| 53 |                                        |      |      |      |      |           |           |      |      |      |
| 54 |                                        |      |      |      |      |           |           |      |      |      |
| 55 |                                        |      |      |      |      |           |           |      |      |      |
| 56 |                                        |      |      |      |      |           |           |      |      |      |
| 57 |                                        |      |      |      |      |           |           |      |      |      |
| 58 |                                        |      |      |      |      |           |           |      |      |      |
| 59 |                                        |      |      |      |      |           |           |      |      |      |
| 60 |                                        |      |      |      |      |           |           |      |      |      |

### Study Synthesis

Extracted data were cross-checked for accuracy and coded by four researchers (ZL, KL LT, RC-W). One researcher (RC-W) completed a narrative synthesis of the coded data, by linking the data to form five interrelated themes: impact of medical leadership on outcomes; physicians on boards; contribution of qualifications and experience; the leader as an individual or part of a team; and doctors transitioning into the medical leadership role. Four broad categories of articles were found in the literature search: (1) individual perspectives on medical leadership (the majority of excluded articles), frequently based on

1 personal experience; (2) empirical research based on self-reported data about medical leadership  
2  
3 (surveys, interviews, focus groups); (3) objective empirical research on the role or characteristics of  
4  
5 healthcare leaders (observations, other data); and (4) objective empirical research on the relationship  
6  
7 between medical leaders and outcomes (hospital performance data, patient outcomes).  
8  
9

## 10 11 12 **DISCUSSION**

### 13 14 **Summary of evidence**

#### 15 16 *Themes*

17  
18  
19 *Impact of medical leadership on outcomes.* Given the complexity encountered within modern  
20  
21 healthcare organisations,<sup>47</sup> it is difficult to demonstrate the impact of leadership on outcomes -- even  
22  
23 when assessing medical and non-medical leadership in the same setting. Four of the sixteen studies  
24  
25 showed either no difference or a negative difference between medical and non-medical leadership in  
26  
27 the aspects of performance that they investigated.<sup>33 37 38 43</sup> The remaining 12 studies found that there  
28  
29 were differences between medical and non-medical managers, and eight of these studies<sup>7 31 32 39-42 44</sup>  
30  
31 correlated findings with hospital performance or patient outcomes. The studies did not provide  
32  
33 sufficient information that would allow us to determine *why* medical leadership might make a  
34  
35 difference. Other than board composition (discussed below), there were few common areas of  
36  
37 investigation, with studies examining varied topics: risk aversion, IT adoption, patient care  
38  
39 arrangements, financial reporting, staff-to-patient ratios, and so on.  
40  
41  
42  
43  
44

45  
46 *Physicians on boards.* We found that evidence supporting the relationship between physician board  
47  
48 participation and organisational performance is accumulating, with empirical studies from the UK,<sup>42</sup>  
49  
50 Europe<sup>41</sup> and the USA<sup>32 39 40 44</sup> all reporting positive associations. This finding is consistent with pre-2005  
51  
52 data,<sup>48 49</sup> and supported by a recent literature review on the topic.<sup>29</sup>  
53  
54

55  
56 *Contribution of qualifications and experience.* None of the studies provided data on the characteristics  
57  
58 of medical leaders that were associated with higher performance. We know that doctors who receive  
59  
60 leadership or management training may perform well in leadership roles. Xirasagar et al.<sup>50 51</sup> for

1 example, when examining the relationship between leadership styles, training, and effectiveness of  
2  
3 doctors who are managers, concluded that doctors who completed managerial training such as MBAs,  
4  
5 MHAs, MPHs, or more than 30 days of in-service training were likely to be more effective leaders. In the  
6  
7 included studies there was no demographic information on the leaders who participated in the study to  
8  
9 enable us to disentangle the contribution to the findings of medical qualifications, medical experience or  
10  
11 management experience. While our included studies found both positive<sup>42</sup> and negative<sup>33 38 43</sup>  
12  
13 differences between a leader's medical and nursing background in relation to leadership outcomes,  
14  
15 much of the literature conflates doctors and nurses into a single group of 'clinicians'.<sup>28</sup>  
16  
17 *Medical leader as an individual or part of a team.* Only two studies<sup>7 31</sup> explored the performance of the  
18  
19 doctor as the CEO or primary organisation leader, and both found that there was an association  
20  
21 between medical leadership and organisational performance. Instead, the remaining studies explored  
22  
23 outcomes when a doctor was included as part of the leadership team. While not providing direct  
24  
25 evidence supporting the doctor as *the* leader, they emphasise current thinking about the need to  
26  
27 engage doctors in healthcare leadership to improve organisational culture and patient outcomes.<sup>52 53</sup> In  
28  
29 a comparison of six high and low performing UK trusts, for example, Mannion et al. found that poor  
30  
31 performing organisations were characterised by cultures where a few senior consultants exerted a  
32  
33 disproportional influence over organisational priorities.<sup>54</sup> Doctors who are engaged as part of a  
34  
35 leadership team are often hybrid managers, who retain a clinical role, and studies elsewhere have found  
36  
37 these managers less likely to be effective in their non-clinical leadership role.<sup>55</sup> Kippist and Fitzgerald,<sup>12</sup>  
38  
39 for example, found that hybrid managers would prioritise clinical work over management, leading to  
40  
41 additional burden on their managerial colleagues, thereby questioning the effectiveness of the hybrid  
42  
43 clinician manager. Spehar et al.<sup>24</sup> explored influences and strategies employed by 30 hybrid leaders in  
44  
45 four hospitals in Norway and concluded that doctors who were managers could not influence other  
46  
47 doctors without drawing on professional power, and that doctors felt they had to maintain their clinical  
48  
49 skills to retain credibility among peers. This emphasis on professional skill constrained doctors from  
50  
51 drawing effectively on positional power. This expert power was not retained and had to be continuously  
52  
53  
54  
55  
56  
57  
58  
59  
60

1 regenerated. In addition, rather than collaborating, doctors saw clinician managers of other  
2 departments as competitors, and saw themselves as representatives of their own professional group.  
3  
4  
5 *Doctors transitioning into the medical leadership role.* The five studies reporting on medical leadership  
6 within organisations touched on some of the barriers or enablers<sup>56</sup> for doctors seeking to enter  
7 management, including difficulties reconciling the clinical and management role. Professional and  
8 organisational culture strongly influences the roles that practitioner leaders can take up and the  
9 influence they can wield.<sup>57</sup> Ham et al.<sup>58</sup> investigated, via 22 qualitative interviews, the experiences of  
10 doctors who become Chief Executives of UK National Health Service organisations and found that  
11 medical managers tended to be “keen amateurs” rather than trained managerial professionals. Kisa and  
12 Ersoy,<sup>59</sup> via a 31 item time management questionnaire, found that medical managers have poor time  
13 management skills. Medical managers are not usually trained in leadership,<sup>11 58</sup> which may explain both  
14 these findings and some of the negative perceptions of doctors as managers. There are also some  
15 indications within our included studies that doctors should adopt a more multidisciplinary approach to  
16 be effective leaders.<sup>33 38 43</sup> West and Barron<sup>60</sup> found that medical managers consult or network mostly  
17 with other medical managers, and that it is the non-medical managers who act as brokers between  
18 professional groups. This finding is supported by other work in the field.<sup>61</sup>

### 41 Limitations

42 Our review was limited in date range and language (English only), and we found insufficient studies  
43 meeting inclusion criteria to enable our research question to be robustly answered. Most studies  
44 examined only one or two aspects of leadership; because these aspects were different across studies, it  
45 was not possible to generalise the findings. Due to the diversity of keywords and publication venues  
46 used by authors of studies on medical leadership, it was difficult to ensure that all relevant literature has  
47 been captured by our search strategy.

### 59 Conclusions

1 There is a modest body of evidence supporting the importance of including physicians in the  
2  
3 composition of hospital or organisational governing boards. Despite a large volume of published  
4  
5 literature on the topic of whether hospitals and healthcare organisations perform better when led by  
6  
7 doctors, however, there are few studies that have examined this topic in a robust way or directly  
8  
9 compared the performance of medical and non-medical managers. While we found sixteen studies that  
10  
11 provided empirical data in respect of this question, only two studies explored the role of organisational  
12  
13 leader or CEO. This is an under researched area that requires further funding and focus.  
14  
15  
16  
17  
18  
19

## 20 FUNDING

21 This research received no specific grant from any funding agency in the public, commercial or not-for-  
22  
23 profit sectors.  
24  
25  
26  
27

## 28 COMPETING INTERESTS

29 The authors have read and understood the *BMJ* policy on declaration of interests and declare that we  
30  
31 have no competing interests.  
32  
33  
34  
35  
36  
37

## 38 DATA SHARING

39 The full dataset is available from the corresponding author on request.  
40  
41  
42  
43  
44

## 45 AUTHORS' CONTRIBUTIONS

46 RC-W and JB conceptualised the study, KL, ZL and LT conducted the database searches. RC-W, KL, ZL and  
47  
48 LT conducted the search and review strategy, RC-W drafted the manuscript, all authors reviewed the  
49  
50 manuscript for critical content.  
51  
52  
53  
54

## 55 REFERENCES

- 56  
57 1. Bruce A, Hill S. Relationships between doctors and managers: the Scottish experience. *Journal of*  
58 *Management in Medicine* 1994;8(5):49-57.  
59  
60

2. Buchanan D, Jordan S, Preston D, et al. Doctor in the process: the engagement of clinical directors in hospital management. *Journal of Management in Medicine* 1997;11(3):132-56.
3. Davies HT, Harrison S. Trends in doctor-management relationships. *British Medical Journal* 2003;326(7390):646.
4. Griffiths R. NHS management inquiry: report to the Secretary of State for Social Services. *Department of Health and Social Security, London* 1983
5. Heyssel RM, Gaintner JR, Kues IW, et al. Decentralized management in a teaching hospital. *New England Journal of Medicine* 1984;310(22):1477-80.
6. Hoff T. The new breed. *Physician Executive* 1996;23(8):31-36.
7. Colla CH, Lewis VA, Shortell SM, et al. First national survey of ACOs finds that physicians are playing strong leadership and ownership roles. *Health Affairs* 2014;33(6):964-71.
8. Dwyer AJ. Medical managers in contemporary healthcare organisations: a consideration of the literature. *Australian Health Review* 2010;34(4):514-22.
9. Bujak J. Physicians in governance: their unique learning curve. *Trustee: the Journal for Hospital Governing Boards* 2005;58(3):28-30.
10. Fulkerson W, Hartung D. Creating a healthy hospital: the demand for physician executives. *Group Practice Journal* 2006;55(9):41.
11. Ham C, Dickinson H. Engaging doctors in leadership: a review of the literature. *NHS Institute for Innovation and Improvement, Coventry* 2008.
12. Kippist L, Fitzgerald A. Organisational professional conflict and hybrid clinician managers: the effects of dual roles in Australian health care organisations. *Journal of Health Organization and Management* 2009;23(6):642-55.
13. Mo TO. Doctors as managers: moving towards general management?: The case of unitary management reform in Norwegian hospitals. *Journal of Health Organization and Management* 2008;22(4):400-15.
14. Loh E. Doctors as health managers: an oxymoron, or a good idea? *Journal of Work-Applied Management* 2015;7(1):52-60.
15. Dickinson H, Ham C, Snelling I, et al. Are we there yet? Models of medical leadership and their effectiveness: an exploratory study. *NIHR Service Delivery and Organisation Programme* 2013.
16. West M, Armit K, Loewenthal L, et al. Leadership and leadership development in healthcare: the evidence base. *London: Faculty of Medical Leadership and Management* 2015.
17. Schneller ES, Greenwald HP, Richardson ML, et al. The physician executive: role in the adaptation of American medicine. *Health Care Management Review* 1997;22(2):90-96.
18. Schultz FC, Pal S, Swan DA. Who should lead a healthcare organization: MDs or MBAs? *Journal of Healthcare Management* 2004;49(2):103.
19. Clay-Williams R, Braithwaite J. Doctors in executive management: a systematic review of the peer-reviewed literature. Sydney, Australia: Centre for Clinical Governance Research, Australian Institute of Health Innovation, University of New South Wales 2012.
20. Braithwaite J, Westbrook MT. A survey of staff attitudes and comparative managerial and non-managerial views in a clinical directorate. *Health Services Management Research* 2004;17(3):141-66.
21. Davies HT, Hodges C-L, Rundall TG. Views of doctors and managers on the doctor-manager relationship in the NHS. *British Medical Journal* 2003;326(7390):626-28.
22. Elina V, Juhani L, Tiina T-J, et al. Doctor-managers as decision makers in hospitals and health centres. *Journal of Health Organization and Management* 2006;20(2):85-94.
23. Spehar I, Frich JC, Kjekshus LE. Clinicians' experiences of becoming a clinical manager: a qualitative study. *BMC Health Services Research* 2012;12(1):1.
24. Spehar I, Frich JC, Kjekshus LE. Clinicians in management: a qualitative study of managers' use of influence strategies in hospitals. *BMC Health Services Research* 2014;14(1):1.
25. Martinussen PE, Magnussen J. Resisting market-inspired reform in healthcare: the role of professional subcultures in medicine. *Social Science & Medicine* 2011;73(2):193-200.

- 1 26. Hawker S, Payne S, Kerr C, et al. Appraising the evidence: reviewing disparate data systematically.  
2 *Qualitative Health Research* 2002;12(9):1284-99.
- 3 27. Dickinson H, Ham C. Engaging doctors in leadership: review of the literature. *Birmingham, University*  
4 *of Birmingham* 2008.
- 5 28. Pihlainen V, Kivinen T, Lammintakanen J. Management and leadership competence in hospitals: a  
6 systematic literature review. *Leadership in Health Services* 2016;29(1):95-110.
- 7 29. Sarto F, Veronesi G. Clinical leadership and hospital performance: assessing the evidence base. *BMC*  
8 *Health Services Research* 2016;16(2):169.
- 9 30. Agarwal R, Green R, Agarwal N, et al. Management practices in Australian healthcare: can NSW  
10 public hospitals do better? *Journal of Health Organization and Management* 2016;30(3):331-53.
- 11 31. Goodall AH. Physician-leaders and hospital performance: is there an association? *Social Science &*  
12 *Medicine* 2011;73(4):535-39.
- 13 32. Jiang H, Locke C, Bass K, et al. Board oversight of quality: any differences in process of care and  
14 mortality? *Journal of Healthcare Management* 2009;54(1):15.
- 15 33. Konu A, Viitanen E. Shared leadership in Finnish social and health care. *Leadership in Health Services*  
16 2008;21(1):28-40.
- 17 34. Kuntz L, Scholtes S. Physicians in leadership: the association between medical director involvement  
18 and staff-to-patient ratios. *Health Care Management Science* 2013;16(2):129-38.
- 19 35. O'Keefe ST. A cross-sectional study of doctors', managers' and public representatives' views  
20 regarding acceptable level of risk in discharges from the emergency department. *QJM*  
21 2015;108(7):533-38.
- 22 36. Parayitam S, Phelps LD, Olson BJ. Strategic decision-making in the healthcare industry: the effects of  
23 physician executives on decision outcomes. *Management Research News* 2007;30(4):283-301.
- 24 37. Saleh S, Kaissi A, Semaan A, et al. Strategic planning processes and financial performance among  
25 hospitals in Lebanon. *The International Journal of Health Planning and Management* 2013;28(1).
- 26 38. Simonen O, Viitanen E, Lehto J, et al. Knowledge sources affecting decision-making among social and  
27 health care managers. *Journal of Health Organization and Management* 2009;23(2):183-99.
- 28 39. Bai G, Krishnan R. Do hospitals without physicians on the board deliver lower quality of care?  
29 *American Journal of Medical Quality* 2015;30(1):58-65.
- 30 40. De Andrade Costa L. The effect of physician board membership on uncompensated care provision.  
31 *Applied Economics* 2014;46(19):2290-300.
- 32 41. Kuntz L, Pulm J, Wittland M. Hospital ownership, decisions on supervisory board characteristics, and  
33 financial performance. *Health Care Management Review* 2016;41(2):165-76.
- 34 42. Veronesi G, Kirkpatrick I, Vallasca F. Clinicians on the board: what difference does it make? *Social*  
35 *Science & Medicine* 2013;77:147-55.
- 36 43. Spehar I, Frich JC, Kjekshus LE. Professional identity and role transitions in clinical managers. *Journal*  
37 *of Health Organization and Management* 2015;29(3):353-66.
- 38 44. Prybil LD. Size, composition, and culture of high-performing hospital boards. *American Journal of*  
39 *Medical Quality* 2006;21(4):224-29.
- 40 45. Lang TA, Hodge M, Olson V, et al. Nurse-patient ratios: a systematic review on the effects of nurse  
41 staffing on patient, nurse employee, and hospital outcomes. *Journal of Nursing Administration*  
42 2004;34(7-8):326-37.
- 43 46. Pronovost PJ, Angus DC, Dorman T, et al. Physician staffing patterns and clinical outcomes in  
44 critically ill patients: a systematic review. *Journal of the American Medical Association*  
45 2002;288(17):2151-62.
- 46 47. Braithwaite J, Clay-Williams R, Nugus P, et al. Health care as a complex adaptive system. In:  
47 Hollnagel E, Braithwaite J, Wears R, eds. Resilient health care. Surrey, UK: Ashgate Publishing  
48 Limited 2013.
- 49 48. Goes JB, Zhan C. The effects of hospital-physician integration strategies on hospital financial  
50 performance. *Health Services Research* 1995;30(4):507.

- 1 49. Molinari C, Alexander J, Morlock L, et al. Does the hospital board need a doctor? The influence of  
2 physician board participation on hospital financial performance. *Medical Care* 1995;170-85.
- 3 50. Xirasagar S, Samuels ME, Curtin TF. Management training of physician executives, their leadership  
4 style, and care management performance: an empirical study. *American Journal of Managed  
5 Care* 2006;12(2):101-8.
- 6 51. Xirasagar S, Samuels ME, Stoskopf CH. Physician leadership styles and effectiveness: An empirical  
7 study. *Medical Care Research and Review* 2005;62(6):720-40.
- 8 52. Sebastian A, Fulop L, Dadich A, et al. Health LEADS Australia and implications for medical leadership.  
9 *Leadership in Health Services* 2014;27(4):355-70.
- 10 53. Smits SJ, Smits SJ, Bowden DE, et al. The role of the physician in transforming the culture of  
11 healthcare. *Leadership in Health Services* 2016;29(3):300-12.
- 12 54. Mannion R, Davies HT, Marshall M. Cultural characteristics of “high” and “low” performing hospitals.  
13 *Journal of Health Organization and Management* 2005;19(6):431-39.
- 14 55. Quinn JF, Perelli S. First and foremost, physicians: the clinical versus leadership identities of  
15 physician leaders. *Journal of Health Organization and Management* 2016;30(4):711-28.
- 16 56. Ramanuj PP, Ryland H, Mitchell EW, et al. In the spotlight: healthcare inspections as an opportunity  
17 for trainee clinicians to be the leaders of today. *BMJ Quality & Safety* 2014;23(8):624-28.
- 18 57. Penlington C, Holmstrom K. Practitioner leadership: a missing link in leadership theory. *The  
19 International Journal of Leadership in Public Services* 2013;9(1/2):32-46.
- 20 58. Ham C, Clark J, Spurgeon P, et al. Doctors who become chief executives in the NHS: from keen  
21 amateurs to skilled professionals. *Journal of the Royal Society of Medicine* 2011;104(3):113-19.
- 22 59. Kisa A, Ersoy K. The need for time management training is universal: Evidence from Turkey. *Hospital  
23 Topics* 2005;83(1):13-19.
- 24 60. West E, Barron DN. Social and geographical boundaries around senior nurse and physician leaders:  
25 an application of social network analysis. *Canadian Journal of Nursing Research* 2005;37(3):132-  
26 49.
- 27 61. Creswick N, Westbrook J. Examining the socialising and problem-solving networks of clinicians on a  
28 hospital ward. *Conference Proceedings of Social Science Methodology Conference of the  
29 Australian Consortium for Social and Political Research (ACSPR)* 2006.

## 37 LIST OF FIGURES

38  
39 Figure 1. Search and review strategy (PRISMA flow diagram)  
40  
41  
42  
43  
44  
45  
46  
47  
48  
49  
50  
51  
52  
53  
54  
55  
56  
57  
58  
59  
60



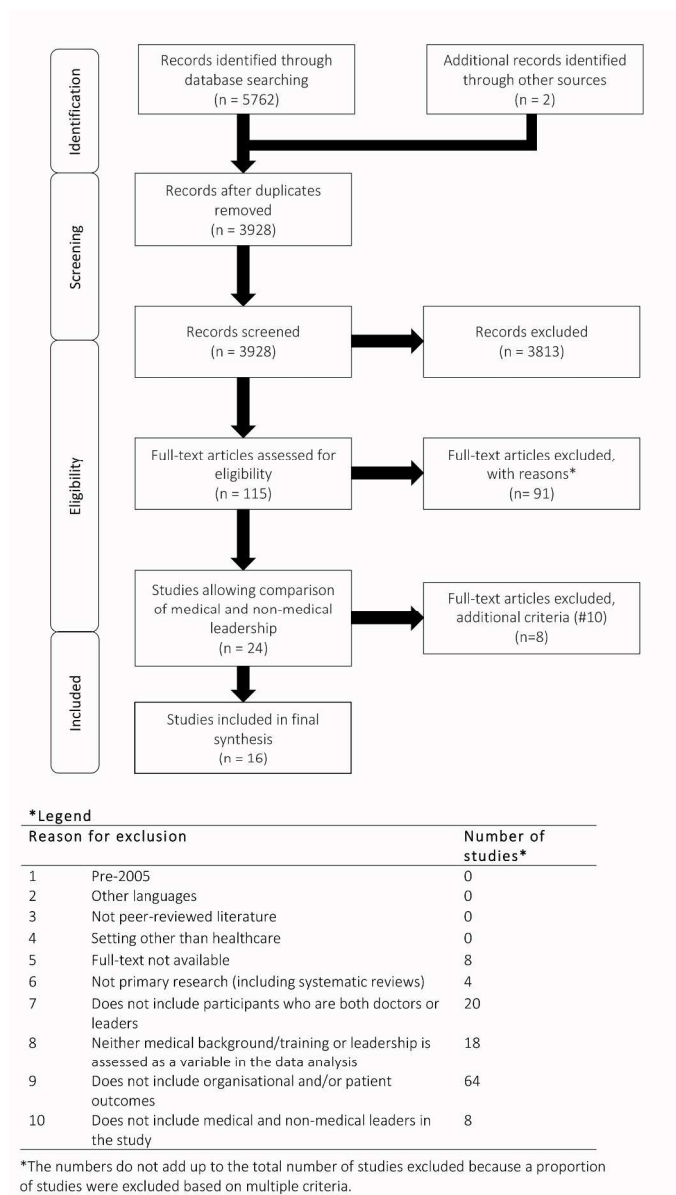

Figure 1. Search and review strategy (PRISMA flow diagram)

179x317mm (300 x 300 DPI)

33  
34  
35  
36  
37  
38  
39  
40  
41  
42  
43  
44  
45  
46  
47  
48  
49  
50  
51  
52  
53  
54  
55  
56  
57  
58  
59  
60

| Study                                | Country   | Primary aim                                                                                                                                                                                                                                              | Secondary aim                                                                                                                                                                                                     | Participants;<br>Organisation            | Method                                                                                                                        | Performance measures                                                                                                              | Key findings                                                                                                                                                                                                                                                                                                                                                                                                                                                                                                                                                                                                                                                                                                                                                                                                                                                                                                                                                                                                                                           |
|--------------------------------------|-----------|----------------------------------------------------------------------------------------------------------------------------------------------------------------------------------------------------------------------------------------------------------|-------------------------------------------------------------------------------------------------------------------------------------------------------------------------------------------------------------------|------------------------------------------|-------------------------------------------------------------------------------------------------------------------------------|-----------------------------------------------------------------------------------------------------------------------------------|--------------------------------------------------------------------------------------------------------------------------------------------------------------------------------------------------------------------------------------------------------------------------------------------------------------------------------------------------------------------------------------------------------------------------------------------------------------------------------------------------------------------------------------------------------------------------------------------------------------------------------------------------------------------------------------------------------------------------------------------------------------------------------------------------------------------------------------------------------------------------------------------------------------------------------------------------------------------------------------------------------------------------------------------------------|
| Agarwal et al. (2016) <sup>1</sup>   | Australia | To investigate the elements of best management practices in an Australian state-run healthcare system.                                                                                                                                                   | To determine whether there is a positive association between management practices score (MPS) and the level of clinical education of a managers in public hospitals.                                              | 42 acute care public hospitals           | Quantitative analysis of survey data                                                                                          | Management Practices Score (MPS), consisting of 21 hospital management practices across multiple dimensions                       | The coefficient on the level of skills and education within hospitals was positive and significant (p=0.06). Therefore, the authors supported the hypothesis that hospitals with a higher proportion of clinically qualified and skilled managers perform significantly better in management practices.                                                                                                                                                                                                                                                                                                                                                                                                                                                                                                                                                                                                                                                                                                                                                |
| Bai and Krishnan (2015) <sup>2</sup> | USA       | To examine whether hospitals without physician participation on their boards of directors deliver lower quality of care.                                                                                                                                 | N/A                                                                                                                                                                                                               | 142 non-profit hospitals                 | Quantitative analysis of US Hospital Quality Alliance and California Office of Statewide Health Planning and Development data | Process of care quality encompassing four categories (heart attack, heart failure, pneumonia, and surgery infection prevention)   | The absence of physicians on the board was associated with a decrease of 3-5% points in three of four measures of care quality (heart failure, pneumonia, and surgery infection prevention).                                                                                                                                                                                                                                                                                                                                                                                                                                                                                                                                                                                                                                                                                                                                                                                                                                                           |
| Colla et al. (2014) <sup>3</sup>     | USA       | To explore the extent to which physicians are engaged in the leadership of emerging Accountable Care Organisations (ACOs), including whether ACOs identify themselves as physician-led, have boards that are run by physicians, and are physician owned. | To examine how physician-led ACOs compare to other ACOs in terms of structure, size, and services provided. To examine the implications of leadership types for ACO capabilities and the future of the ACO model. | 173 accountable care organisations       | Quantitative analysis of survey data                                                                                          | Care management and technology capabilities                                                                                       | Physician-led organisations had fewer patients per contract than other ACOs.<br><br>Physician-led ACOs had similar care management and health IT capabilities to those of other ACOs, despite having different leadership structures and offering fewer services.<br><br>Physician-led ACOs were leading in outpatient care management and health IT. However, they were falling behind in their ability to manage care across settings.<br><br>Physician-led organisations may face greater challenges than other ACOs in managing transitions between settings of care and managing hospital-based care, as they were less likely to include hospitals or post-acute care facilities.<br><br>Physician-led ACOs were less likely than other ACOs to offer services that are traditionally separate from medical care, such as pharmacy.                                                                                                                                                                                                              |
| De Andrade (2014) <sup>4</sup>       | USA       | To investigate whether having board members with medical expertise affects the levels of uncompensated care provided by hospitals.                                                                                                                       | To verify how the relationship between board member medical expertise and uncompensated care is affected by the hospital's ownership type.                                                                        | 281 hospitals                            | Quantitative analysis of data from the California Office of Statewide Health Planning and Development for 1997-2010           | Uncompensated care provision                                                                                                      | Physician board membership was not related to uncompensated care provision, except when hospital's ownership status was taken into account.<br><br>When hospital ownership type was considered, the percentage of physicians on the board did affect the provision of uncompensated care.<br><br>Relative to non-profit and public hospitals, for-profit hospitals provided more uncompensated care the higher the percentage of physicians on the board. For an average for-profit board size, which has 10 members, substituting one member by a physician increased the amount of uncompensated care provided by 19%.                                                                                                                                                                                                                                                                                                                                                                                                                               |
| Goodall (2011) <sup>5</sup>          | USA       | To determine if there is an association between physician leaders and hospital performance.                                                                                                                                                              | N/A                                                                                                                                                                                                               | 300 healthcare executives; 100 hospitals | Quantitative analysis of survey data                                                                                          | Index of Hospital Quality                                                                                                         | Positive association was found between physician CEO and hospital performance for all three hospital specialties (p<0.001).                                                                                                                                                                                                                                                                                                                                                                                                                                                                                                                                                                                                                                                                                                                                                                                                                                                                                                                            |
| Jiang et al. (2009) <sup>6</sup>     | USA       | To examine whether differences exist in hospitals' quality performance in relation to adoption of particular practices in board oversight of quality.                                                                                                    | N/A                                                                                                                                                                                                               | 562 healthcare executives; 490 hospitals | Quantitative analysis of survey data                                                                                          | Process of care performance and risk-adjusted mortality relating to three conditions (heart attack, heart failure, and pneumonia) | Hospitals that had representatives with clinical expertise serving on the quality board had significantly better performance in process of care and/or mortality.<br><br>Sixty percent of participating hospitals had a Chief Medical Officer or Vice President of Medical Affairs on the committee; this resulted in significantly (p<0.05) higher process of care scores (85.3% vs 81%) and lower risk adjusted mortality rates (5.6% vs 7.3%) than hospitals that did not have a Chief Medical Officer or Vice President of Medical Affairs as committee member.<br><br>Eighty-three percent of participating hospitals had medical staff on the committee; this resulted in significantly (p<0.05) higher process of care scores (84.2% vs 80.9%) but no difference in risk adjusted mortality rates.<br><br>Sixty-three percent of participating hospitals had a clinical board member on the committee; this resulted in no difference in process of care scores but significantly (p<0.05) lower risk adjusted mortality rates (5.7% vs. 7.2%). |

| Study                                 | Country | Primary aim                                                                                                                                                                                                                                                                               | Secondary aim                                                                                                                                                                                                                                                                                                                                                                                                                  | Participants;<br>Organisation                                                                                                                                                                     | Method                                                                                                                                                                                                                    | Performance measures                                                                                                                                                         | Key findings                                                                                                                                                                                                                                                                                                                                                                                                                                                                                                                                                                                                                                                                                                  |
|---------------------------------------|---------|-------------------------------------------------------------------------------------------------------------------------------------------------------------------------------------------------------------------------------------------------------------------------------------------|--------------------------------------------------------------------------------------------------------------------------------------------------------------------------------------------------------------------------------------------------------------------------------------------------------------------------------------------------------------------------------------------------------------------------------|---------------------------------------------------------------------------------------------------------------------------------------------------------------------------------------------------|---------------------------------------------------------------------------------------------------------------------------------------------------------------------------------------------------------------------------|------------------------------------------------------------------------------------------------------------------------------------------------------------------------------|---------------------------------------------------------------------------------------------------------------------------------------------------------------------------------------------------------------------------------------------------------------------------------------------------------------------------------------------------------------------------------------------------------------------------------------------------------------------------------------------------------------------------------------------------------------------------------------------------------------------------------------------------------------------------------------------------------------|
| Konu and Viitanen (2008) <sup>7</sup> | Finland | To investigate the incidence of shared leadership among middle-level managers in social service and health care.                                                                                                                                                                          | N/A                                                                                                                                                                                                                                                                                                                                                                                                                            | 433 middle-level managers in social and healthcare                                                                                                                                                | Quantitative analysis of survey data                                                                                                                                                                                      | Shared leadership practices                                                                                                                                                  | Shared leadership practices were more common among managers without a medical background.                                                                                                                                                                                                                                                                                                                                                                                                                                                                                                                                                                                                                     |
| Kuntz et al. (2013) <sup>8</sup>      | Germany | To assess the influence of the extent to which physicians are involved in hospital leadership on staff- to-patient ratios.                                                                                                                                                                | To investigate the significance of employing a full-time Medical Director (MD) and, for hospitals with a part-time MD, the impact that the amount of time spent in this role has on physician- to- patient-ratio and nurse-to-patient ratio.                                                                                                                                                                                   | 604 hospitals, with a subsample of 442 hospitals                                                                                                                                                  | Quantitative analysis of survey data                                                                                                                                                                                      | Staff-to-patient ratios                                                                                                                                                      | There were significant differences in staff-to-patient ratios between the low level part-time category and the high-level part-time category (physicians: $p < 0.001$ , nurses: $p < 0.001$ ), as well as for the difference between the high level part-time category and the full-time involvement (physicians: $p < 0.001$ , nurses: $p < 0.01$ ). Regression analysis demonstrated a positive association between full-time MDs and staff-to-patient ratios for both physicians and nurses. With the exception of part-time involvement and nurse- to-patient ratio, this association remained strong after controlling for a range of confounding variables (case-mix, size, ownership).                 |
| Kuntz et al. (2016) <sup>9</sup>      | Germany | To explain differences in the financial performance of hospitals with regard to ownership by studying the size and composition of supervisory boards.                                                                                                                                     | To examine three hypotheses:<br>H1: Hospital financial performance depends on ownership.<br>H2: Hospital supervisory board size and composition depend on ownership.<br>H3: The influence of hospital ownership on financial performance is mediated by the size and composition of the supervisory board.                                                                                                                     | 175 hospital companies operating<br>246 hospitals                                                                                                                                                 | Quantitative analysis of hospital financial performance data (from the AMADEUS database) and information on hospital and board characteristics (from business and quality reports, hospital websites and health insurers) | Financial performance, based on four measures (return on assets (ROA), earnings before interest and tax (EBIT) margin, total profit margin, and net income)                  | Financial performance, and board size and composition depended on ownership ( $p < .01$ for ROA and $p < .001$ for the other four performance measures).<br><br>An increase in board size and greater political participation were negatively associated with all five tested measures of financial performance.<br><br>An increase in physician participation was positively associated with one dimension of financial performance, ROA ( $0.05$ , $p = .061$ ).<br><br>An increase in nurse and economist participation was negatively associated with financial performance; no associations were found for clerical participation.                                                                       |
| O'Keefe (2015) <sup>10</sup>          | Ireland | To examine the hypothesis that there would be an increasing gradient of risk aversion from physicians through clinicians in management and managers to public representatives regarding an acceptable level of risk when considering discharging a patient from the emergency department. | N/A                                                                                                                                                                                                                                                                                                                                                                                                                            | 180 consultant physicians, 47 clinicians involved in management, 143 senior healthcare managers and 418 public representatives; acute care hospitals                                              | Quantitative analysis of survey data                                                                                                                                                                                      | Level of acceptable risk                                                                                                                                                     | Post hoc pairwise comparisons (Bonferroni corrected significance level of $P < 0.008$ ) showed no significant differences between physicians and clinician managers or between managers and public representatives in acceptability of risk; however, all pairwise comparisons between doctors and managers or public representatives were significant.<br><br>There were significant differences in the acceptability of risk and a reducing tolerance of a preventable death following discharge from the emergency department between doctors, healthcare managers and public representatives; clinicians with a managerial role did not differ in risk tolerance from their purely clinical counterparts. |
| Parayitam et al. (2007) <sup>11</sup> | USA     | To analyse the outcomes of decisions when physician executives are involved in strategic decision-making processes in healthcare organisations.                                                                                                                                           | To examine three hypotheses:<br>H1: The greater the presence of physician executives in shared decision-making teams (SDMTs) the greater will be the decision quality.<br>H2: The greater the presence of physician executives in SDMTs the greater will be the understanding of the rationale of decisions.<br>H3: The greater the presence of physician executives in SDMTs the greater will be the commitment to decisions. | 109 hospitals, 114 CEOs, 254 strategic decision makers (executive officers, director of human resources, chief technical offices, chiefs of staff, personnel involved in facilities, maintenance) | Quantitative analysis of survey data                                                                                                                                                                                      | Decision outcomes (decision quality, understanding, and commitment)                                                                                                          | The ratio of physicians was positively correlated with decision understanding, commitment and quality.                                                                                                                                                                                                                                                                                                                                                                                                                                                                                                                                                                                                        |
| Prybil (2006) <sup>12</sup>           | USA     | To determine whether board structures, processes, and practices in high-performing hospitals differ from similar hospitals where performance is midrange and, if so, in what ways.                                                                                                        | N/A                                                                                                                                                                                                                                                                                                                                                                                                                            | 7 matched hospital pairs                                                                                                                                                                          | Mixed method analysis of hospital documents and interviews with hospital CEOs and board members                                                                                                                           | High performance hospitals (from the Solucient Center for Healthcare Improvement's '100 Top Hospitals' listings from 1999-2003) matched with midrange performance hospitals. | Medical staff members formed a larger component of the boards of high performing hospitals (30.3%) as compared with the boards of midrange hospitals (20.8%).<br><br>In five of the seven high performing hospitals, medical staff members comprised 25% or more of the boards' voting members. This was true in only one mid-range hospital.                                                                                                                                                                                                                                                                                                                                                                 |
| Saleh et al. (2013) <sup>13</sup>     | Lebanon | To explore the use of strategic planning processes in Lebanese hospitals and to investigate its association with financial performance.                                                                                                                                                   | To examine six hypotheses:<br>H1: The existence of a strategic plan is favorably associated with hospital performance.<br>H2: A more developed strategic plan is                                                                                                                                                                                                                                                               | 79 hospitals (56.4%)                                                                                                                                                                              | Quantitative analysis of survey data and hospital performance data from the Lebanese Ministry of Public Health                                                                                                            | Occupancy rate (OR) and revenue-per-bed (RPB)                                                                                                                                | There was no association between having a strategic plan and either of the two performance measures.<br><br>The extent of strategic plan implementation was adversely related to OR, that is, the more a hospital implemented its                                                                                                                                                                                                                                                                                                                                                                                                                                                                             |

| Study                                | Country | Primary aim                                                                                                                                    | Secondary aim                                                                                                                                                                                                                                                                                                                                                                                                                                                                   | Participants;<br>Organisation                                                                                                                                                           | Method                                                                                                                                                                                                        | Performance measures                                                                                                                                                                                      | Key findings                                                                                                                                                                                                                                                                                                                                                                                                                                                                                                                                                                                                                                                                                                                                                                                                                                                                        |
|--------------------------------------|---------|------------------------------------------------------------------------------------------------------------------------------------------------|---------------------------------------------------------------------------------------------------------------------------------------------------------------------------------------------------------------------------------------------------------------------------------------------------------------------------------------------------------------------------------------------------------------------------------------------------------------------------------|-----------------------------------------------------------------------------------------------------------------------------------------------------------------------------------------|---------------------------------------------------------------------------------------------------------------------------------------------------------------------------------------------------------------|-----------------------------------------------------------------------------------------------------------------------------------------------------------------------------------------------------------|-------------------------------------------------------------------------------------------------------------------------------------------------------------------------------------------------------------------------------------------------------------------------------------------------------------------------------------------------------------------------------------------------------------------------------------------------------------------------------------------------------------------------------------------------------------------------------------------------------------------------------------------------------------------------------------------------------------------------------------------------------------------------------------------------------------------------------------------------------------------------------------|
|                                      |         |                                                                                                                                                | positively associated with hospital performance.<br>H3: Implementation of the strategic plan is positively associated with hospital performance.<br>H4: CEO control of the strategic planning process is positively associated with hospital performance.<br>H5: Strategic planning process is positively associated with hospital performance.<br>H6: The level of physician involvement in the strategic planning process is positively associated with hospital performance. |                                                                                                                                                                                         |                                                                                                                                                                                                               |                                                                                                                                                                                                           | strategic plan, the lower its OR ( $p < 0.05$ ).<br><br>A similar trend was observed with level of governing board involvement in strategic plan development.<br><br>There was no association between the level of physician involvement in the strategic planning process and hospital outcomes; generally, physician involvement was low (4.1 out of a possible score of 7).                                                                                                                                                                                                                                                                                                                                                                                                                                                                                                      |
| Simonen et al. (2009) <sup>14</sup>  | Finland | To determine how social and health care managers evaluate the impact of knowledge sources as affecting their decision-making.                  | To determine whether evaluations differ depending on the manager's professional background, activity sector, gender, management experience, or age.                                                                                                                                                                                                                                                                                                                             | 404 middle-level social and healthcare managers in a hospital                                                                                                                           | Quantitative analysis of survey data                                                                                                                                                                          | Impact of various knowledge sources on decision-making                                                                                                                                                    | Doctor managers more strongly perceived that their decision-making was influenced by their own professional experience, journals and scientific research within their own professional field, and nationwide interaction within their own profession.<br><br>Differences were found between doctor managers and nurse managers with respect to organization documents and publications, which clearly seemed to carry more weight in nurse managers' decision-making.<br><br>Regarding other knowledge sources, i.e., knowledge obtained from one's own subordinates, examples from other corresponding units, patient demands and needs, media statements, municipality/city resident opinions, contracts between municipalities and municipal federations, or one's own professional education, no differences were found between managers of different professional backgrounds. |
| Spehar et al. (2015) <sup>15</sup>   | Norway  | To investigate how clinicians' professional background influences their transition into the managerial role and identity as clinical managers. | N/A                                                                                                                                                                                                                                                                                                                                                                                                                                                                             | Four public hospitals, two health trusts; 30 clinician managers (doctors, nurses, allied health) interviewed, 20 of these were observed in management and staff meetings during the day | Qualitative analysis of interview and observation data                                                                                                                                                        | Managerial role transition and clinical manager identity                                                                                                                                                  | Doctors experienced difficulties in reconciling the clinical and management role and used clinical work to gain legitimacy and respect from medical colleagues.<br><br>Nurses experienced a faster and more positive transition into the manager role, and were more fully engaged in the managerial aspects of the role.                                                                                                                                                                                                                                                                                                                                                                                                                                                                                                                                                           |
| Veronesi et al. (2013) <sup>16</sup> | UK      | To determine how much difference managers will make to performance outcomes.                                                                   | To determine whether the positive outcomes of clinical leadership derive from the participation of all clinicians in boards (including nurses and allied health professions) or only doctors.                                                                                                                                                                                                                                                                                   | 102 NHS hospital trusts in England (60% total)                                                                                                                                          | Quantitative analysis of data from hospital trust annual reports, publicly available performance measures from the Healthcare Commission, and data gathered by Dr Foster over a three-year period (2006-2009) | Quality of the service provided (compliance with core standards concentrating on four main areas: health and well-being, clinical effectiveness, safety and patient focus, and ease and equity of access) | Significant and positive association was found between a higher percentage of clinicians on boards and the quality ratings of service providers (confirmed in relation to lower morbidity rates and tests to exclude the possibility of reverse causality).<br><br>No equivalent association was found for clinical professions such as nurses and other allied health professions.                                                                                                                                                                                                                                                                                                                                                                                                                                                                                                 |



# PRISMA 2009 Checklist

| Section/topic                      | #  | Checklist item                                                                                                                                                                                                                                                                                              | Reported on page # |
|------------------------------------|----|-------------------------------------------------------------------------------------------------------------------------------------------------------------------------------------------------------------------------------------------------------------------------------------------------------------|--------------------|
| <b>TITLE</b>                       |    |                                                                                                                                                                                                                                                                                                             |                    |
| Title                              | 1  | Identify the report as a systematic review, meta-analysis, or both.                                                                                                                                                                                                                                         | 1                  |
| <b>ABSTRACT</b>                    |    |                                                                                                                                                                                                                                                                                                             |                    |
| Structured summary                 | 2  | Provide a structured summary including, as applicable: background; objectives; data sources; study eligibility criteria, participants, and interventions; study appraisal and synthesis methods; results; limitations; conclusions and implications of key findings; systematic review registration number. | 2                  |
| <b>INTRODUCTION</b>                |    |                                                                                                                                                                                                                                                                                                             |                    |
| Rationale                          | 3  | Describe the rationale for the review in the context of what is already known.                                                                                                                                                                                                                              | 3-5                |
| Objectives                         | 4  | Provide an explicit statement of questions being addressed with reference to participants, interventions, comparisons, outcomes, and study design (PICOS).                                                                                                                                                  | 5-6                |
| <b>METHODS</b>                     |    |                                                                                                                                                                                                                                                                                                             |                    |
| Protocol and registration          | 5  | Indicate if a review protocol exists, if and where it can be accessed (e.g., Web address), and, if available, provide registration information including registration number.                                                                                                                               | N/A                |
| Eligibility criteria               | 6  | Specify study characteristics (e.g., PICOS, length of follow-up) and report characteristics (e.g., years considered, language, publication status) used as criteria for eligibility, giving rationale.                                                                                                      | 6                  |
| Information sources                | 7  | Describe all information sources (e.g., databases with dates of coverage, contact with study authors to identify additional studies) in the search and date last searched.                                                                                                                                  | 6                  |
| Search                             | 8  | Present full electronic search strategy for at least one database, including any limits used, such that it could be repeated.                                                                                                                                                                               | 6-7                |
| Study selection                    | 9  | State the process for selecting studies (i.e., screening, eligibility, included in systematic review, and, if applicable, included in the meta-analysis).                                                                                                                                                   | 7-8                |
| Data collection process            | 10 | Describe method of data extraction from reports (e.g., piloted forms, independently, in duplicate) and any processes for obtaining and confirming data from investigators.                                                                                                                                  | 8                  |
| Data items                         | 11 | List and define all variables for which data were sought (e.g., PICOS, funding sources) and any assumptions and simplifications made.                                                                                                                                                                       | 8                  |
| Risk of bias in individual studies | 12 | Describe methods used for assessing risk of bias of individual studies (including specification of whether this was done at the study or outcome level), and how this information is to be used in any data synthesis.                                                                                      | 8                  |
| Summary measures                   | 13 | State the principal summary measures (e.g., risk ratio, difference in means).                                                                                                                                                                                                                               | N/A                |
| Synthesis of results               | 14 | Describe the methods of handling data and combining results of studies, if done, including measures of consistency (e.g., $I^2$ for each meta-analysis).                                                                                                                                                    | 8-9                |

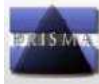

# PRISMA 2009 Checklist

Page 1 of 2

| Section/topic                 | #  | Checklist item                                                                                                                                                                                           | Reported on page # |
|-------------------------------|----|----------------------------------------------------------------------------------------------------------------------------------------------------------------------------------------------------------|--------------------|
| Risk of bias across studies   | 15 | Specify any assessment of risk of bias that may affect the cumulative evidence (e.g., publication bias, selective reporting within studies).                                                             | 8                  |
| Additional analyses           | 16 | Describe methods of additional analyses (e.g., sensitivity or subgroup analyses, meta-regression), if done, indicating which were pre-specified.                                                         | N/A                |
| <b>RESULTS</b>                |    |                                                                                                                                                                                                          |                    |
| Study selection               | 17 | Give numbers of studies screened, assessed for eligibility, and included in the review, with reasons for exclusions at each stage, ideally with a flow diagram.                                          | 9                  |
| Study characteristics         | 18 | For each study, present characteristics for which data were extracted (e.g., study size, PICOS, follow-up period) and provide the citations.                                                             | 9-10               |
| Risk of bias within studies   | 19 | Present data on risk of bias of each study and, if available, any outcome level assessment (see item 12).                                                                                                | 16-17              |
| Results of individual studies | 20 | For all outcomes considered (benefits or harms), present, for each study: (a) simple summary data for each intervention group (b) effect estimates and confidence intervals, ideally with a forest plot. | 10-16              |
| Synthesis of results          | 21 | Present results of each meta-analysis done, including confidence intervals and measures of consistency.                                                                                                  | 17                 |
| Risk of bias across studies   | 22 | Present results of any assessment of risk of bias across studies (see Item 15).                                                                                                                          | 16-17              |
| Additional analysis           | 23 | Give results of additional analyses, if done (e.g., sensitivity or subgroup analyses, meta-regression [see Item 16]).                                                                                    | N/A                |
| <b>DISCUSSION</b>             |    |                                                                                                                                                                                                          |                    |
| Summary of evidence           | 24 | Summarize the main findings including the strength of evidence for each main outcome; consider their relevance to key groups (e.g., healthcare providers, users, and policy makers).                     | 17-20              |
| Limitations                   | 25 | Discuss limitations at study and outcome level (e.g., risk of bias), and at review-level (e.g., incomplete retrieval of identified research, reporting bias).                                            | 20                 |
| Conclusions                   | 26 | Provide a general interpretation of the results in the context of other evidence, and implications for future research.                                                                                  | 20-21              |
| <b>FUNDING</b>                |    |                                                                                                                                                                                                          |                    |
| Funding                       | 27 | Describe sources of funding for the systematic review and other support (e.g., supply of data); role of funders for the systematic review.                                                               | 21                 |

From: Moher D, Liberati A, Tetzlaff J, Altman DG, The PRISMA Group (2009). Preferred Reporting Items for Systematic Reviews and Meta-Analyses: The PRISMA Statement. PLoS Med 6(7): e1000097. doi:10.1371/journal.pmed1000097

For more information, visit: [www.prisma-statement.org](http://www.prisma-statement.org).

Page 2 of 2

For peer review only - <http://bmjopen.bmj.com/site/about/guidelines.xhtml>

# BMJ Open

## Medical leadership - a systematic narrative review: Do hospitals and healthcare organisations perform better when led by doctors?

|                                 |                                                                                                                                                                                                                                                                                                                                                                                                                                       |
|---------------------------------|---------------------------------------------------------------------------------------------------------------------------------------------------------------------------------------------------------------------------------------------------------------------------------------------------------------------------------------------------------------------------------------------------------------------------------------|
| Journal:                        | <i>BMJ Open</i>                                                                                                                                                                                                                                                                                                                                                                                                                       |
| Manuscript ID                   | bmjopen-2016-014474.R2                                                                                                                                                                                                                                                                                                                                                                                                                |
| Article Type:                   | Research                                                                                                                                                                                                                                                                                                                                                                                                                              |
| Date Submitted by the Author:   | 23-Aug-2017                                                                                                                                                                                                                                                                                                                                                                                                                           |
| Complete List of Authors:       | Clay-Williams, Robyn; Macquarie University, Australian Institute of Health Innovation<br>Ludlow, Kristiana; Macquarie University, Australian Institute of Health Innovation<br>Testa, Luke; Macquarie University, Australian Institute of Health Innovation<br>Li, Zhicheng; Macquarie University, Australian Institute of Health Innovation<br>Braithwaite, Jeffrey; Macquarie University, Australian Institute of Health Innovation |
| <b>Primary Subject Heading</b>: | Medical management                                                                                                                                                                                                                                                                                                                                                                                                                    |
| Secondary Subject Heading:      | Health services research                                                                                                                                                                                                                                                                                                                                                                                                              |
| Keywords:                       | leadership, HEALTH SERVICES ADMINISTRATION & MANAGEMENT, physician executive, clinician-manager, organisational performance, patient outcomes                                                                                                                                                                                                                                                                                         |
|                                 |                                                                                                                                                                                                                                                                                                                                                                                                                                       |

SCHOLARONE™  
Manuscripts

1 **Title: Medical leadership - a systematic narrative review: Do hospitals and healthcare organisations**  
2  
3 **perform better when led by doctors?**  
4  
5  
6

7 Robyn Clay-Williams\*, PhD

8 Australian Institute of Health Innovation

9 Level 6, 75 Talavera Rd Macquarie University, NSW 2109, Australia

10 T: +61 2 9850 2438 | E: [robyn.clay-williams@mq.edu.au](mailto:robyn.clay-williams@mq.edu.au)  
11  
12

13  
14  
15  
16 Kristiana Ludlow, BPsych(Hons)

17 Australian Institute of Health Innovation

18 Macquarie University, Sydney, Australia  
19  
20

21  
22  
23 Luke Testa, MPH

24 Australian Institute of Health Innovation

25 Macquarie University, Sydney, Australia  
26  
27

28  
29  
30 Zhicheng Li, BHsc(Hons)

31 Australian Institute of Health Innovation

32 Macquarie University, Sydney, Australia  
33  
34

35  
36  
37 Jeffrey Braithwaite, PhD

38 Australian Institute of Health Innovation

39 Macquarie University, Sydney, Australia  
40  
41

42  
43  
44  
45 \* corresponding author

46  
47 **WORD COUNT:** 4,780  
48  
49

50  
51  
52 **KEYWORDS**  
53

54  
55 Leadership, management, physician executive, clinician-manager, organisational performance, board

56  
57 director, patient outcomes  
58  
59  
60



**ABSTRACT**

**Introduction:** Despite common assumptions that doctors are well placed to lead hospitals and healthcare organisations, the peer-reviewed literature contains little evidence on the performance of doctors in leadership roles in comparison with that of non-medical managers.

**Objectives:** To determine whether there is an association between the leader's medical background and management performance in terms of organisational performance or patient outcomes.

**Methods:** We searched for peer-reviewed, English language studies using Medline, Embase and Emerald Management between 2005 and 2017. We included quantitative, qualitative, and mixed method empirical studies on the performance of senior healthcare managers where participants were described as doctors or leaders, and where comparative performance data were provided on non-medical leaders. Studies without full-text available, or no organisational, leadership behaviour or patient measures, were excluded.

**Results:** The search, conducted in Medline (n=3,395), Embase (n=1,913) and Emerald Management (n=454) databases, yielded 3,926 entries. After application of inclusion and exclusion criteria, sixteen studies remained. Twelve studies found that there were positive differences between medical and non-medical leaders, and eight studies correlated those findings with hospital performance or patient outcomes. Six studies examined the composition of boards of directors; otherwise there were few common areas of investigation. Five interrelated themes emerged from a narrative analysis: the impact of medical leadership on outcomes; doctors on boards; contribution of qualifications and experience; the medical leader as an individual or part of a team; and doctors transitioning into the medical leadership role.

**Discussion and conclusion:** A modest body of evidence supports the importance of including doctors on organisational governing boards. Despite many published articles on the topic of whether hospitals and healthcare organisations perform better when led by doctors, there were few empirical studies that directly compared the performance of medical and non-medical managers. This is an under-researched area that requires further funding and focus.

### Strengths and limitations of this study

- To the best of our knowledge, this is the first systematic review of the literature published over the last decade to determine whether healthcare leaders who are doctors perform better than those with non-medical backgrounds in terms of organisational performance or patient outcomes
- We developed robust search strategies and a rigorous reviewing process aiming to minimise bias and ensure the objectiveness and transparency of the systematic review
- A modest body of evidence supports the importance of including doctors in the composition of governing boards to improve organisational performance
- There were insufficient studies meeting inclusion criteria to enable our research question to be fully answered

## INTRODUCTION

### Rationale

Prior to the 1970s, doctors very often ran hospitals<sup>1 2</sup> and administrators played a subordinate, coordination, rather than a leadership, role. As healthcare moved towards a more business-bureaucratic<sup>3</sup> model of practice, administrators were engaged to manage general organisational-operational business performance, but doctors continued to expend substantial resources and manage the major decisions affecting patient care. In 1983, the Griffiths Report<sup>4</sup> was released in the UK, paving the way for the introduction of a new purchaser-provider model of healthcare. In the USA, the idea which became known as clinical directorates was established.<sup>5</sup> The Medical Director role and clinical directorates became more widely established, and over time enabled more senior managers to have greater control over resources. Doctors did not always consider such roles attractive,<sup>5</sup> but felt that they needed to take up these part-time appointments in order to continue to partake in decisions affecting

1 their work. In the 1990s, when managed care was established in the USA,<sup>6</sup> new drivers emerged as  
2  
3 doctors moved from part-time advisory roles into full-time management in order to contribute to  
4  
5 running healthcare organisations, secure greater control over resource allocation and participate in  
6  
7 senior decision-making.  
8  
9

10  
11 Today, doctors are well-established in management roles, with the first survey of Accountable Care  
12  
13 Organisations (ACOs) in the USA finding that by 2014, 51% were led by doctors.<sup>7</sup> Within hospitals and  
14  
15 other healthcare organisations, medical departments are normally led by doctors, and report to the  
16  
17 Medical Director (or equivalent) who is typically a member of the executive team (see Dwyer<sup>8</sup> for a  
18  
19 literature-based review on the roles of medical managers). By the turn of the 21<sup>st</sup> century in the USA,  
20  
21 50% of physician executives no longer practiced medicine,<sup>6</sup> and physician executives began to gain  
22  
23 acceptance as administrators of managed care institutions.<sup>9 10</sup> In the UK<sup>2 11</sup> (and elsewhere<sup>11 12</sup>), where  
24  
25 the culture was historically less well disposed to accepting doctors who relinquish their clinical work,<sup>13</sup>  
26  
27 the majority of medical executives today act as ‘hybrid managers’, who continue to manage a clinical  
28  
29 workload alongside their management responsibilities. In the UK National Health Service (NHS), where  
30  
31 doctors hold positions of power within healthcare organisations that enable them to participate in  
32  
33 managerial decisions, enhancing medical engagement in leadership is seen as a factor that may  
34  
35 contribute to improved organisational performance.<sup>11</sup> Benefits to employing doctors in healthcare  
36  
37 management roles may include bottom-up leadership, greater political influence, and improved  
38  
39 communications between doctors and senior management.<sup>14</sup> Current focus on engaging doctors in  
40  
41 leadership centres on efforts to link clinical decisions with those of strategic management, and has  
42  
43 broadened to include key accountabilities for quality of care in addition to resource management.<sup>15</sup>  
44  
45 Today’s leaders in healthcare perform many tasks. For this review, we have adopted the UK’s King’s  
46  
47 Fund description of the healthcare leadership task: “to ensure direction, alignment and commitment  
48  
49 within teams and organisations”.<sup>16, p2</sup> This task may incorporate elements of leadership, management  
50  
51 and administration.  
52  
53  
54  
55  
56  
57  
58  
59  
60

1 Despite the prevalence of such physician executives (to use the US term) occupying leadership roles in  
2 health systems, we do not know to what extent prior medical training or experience as a doctor affects  
3 the performance of healthcare executives. Research questions include: Do healthcare executives who  
4 are doctors perform better than those who are not; and, if so, in what ways do they perform better?  
5 What is it about a doctor that might enhance their leadership ability: medical training, experience in the  
6 medical role, or something else? Is it important for organisational performance to have doctors as  
7 members of the executive leadership team, and if so, why?

8 Previous research has found no difference in performance between medical and non-medical  
9 managers;<sup>17-19</sup> however, opinion on the topic of 'which profession should manage hospitals' is prevalent  
10 and polarised. There appears to be a view that the doctor's mindset is different to that of the general  
11 healthcare manager.<sup>20 21</sup> Arguing against the benefits of medical leadership, papers cite doctors' over-  
12 identification with their professional clinical role, tendency to be conservative individualists rather than  
13 team players, lack of formal management training, and their purported weaknesses in financial  
14 management and organisational strategy.<sup>12 22-24</sup>

15 However, doctors prefer to be led by doctors,<sup>11</sup> and articles in favour of medical leadership cite doctors'  
16 strengths in addressing patient outcomes, quality and safety issues, and decision-making, and point to  
17 their ability to specialise, and intelligence. A recent study surveying doctors' reactions to hospital reform  
18 found that doctors who were also leaders reacted more positively to hospital reform than those who  
19 spent most of their time caring for patients.<sup>25</sup> Clearly, the question 'do hospitals and healthcare  
20 organisations perform better when led by doctors?', particularly in relation to the leadership structures  
21 of modern healthcare systems, has not been settled.

## 22 Objectives

23 This study presents the results of a systematic review of the literature published since 2005 on medical  
24 leadership. We sought contemporary evidence on the leadership performance of executives or senior  
25 managers who were also doctors. The objective of the review was to determine if there is an association

1 between leaders having a medical background and management performance, in terms of  
2  
3 organisational performance or patient outcomes. This objective was framed by the research question:  
4  
5 Do hospitals and healthcare organisations perform better when led by doctors?  
6  
7 To enable us to objectively answer our question, and to minimise the confounders associated with  
8  
9 comparisons in healthcare, we sought quantitative, qualitative and mixed method empirical studies  
10  
11 reporting on leadership performance that included medical and non-medical leaders in the same  
12  
13 setting.  
14  
15  
16  
17  
18  
19

## 20 **METHODS**

### 21 **Eligibility criteria**

#### 22 *Types of participants*

23  
24 We included empirical studies on senior managers in healthcare organisations that involved participants  
25  
26 who were both doctors and leaders, and participants who were non-medical leaders. Non-medical  
27  
28 leaders included those who had a clinical background other than medicine (e.g., nurses, allied health  
29  
30 professionals) and those who did not have a clinical background.  
31  
32  
33  
34

#### 35 *Types of outcomes*

36  
37 After examining the literature, we included three types of outcome measures. These were: (1) patient  
38  
39 measures, e.g., patient outcomes, or processes of care; (2) organisational measures, e.g., staffing,  
40  
41 finance, or hospital ratings; and (3) leadership behaviour measures, e.g., management processes,  
42  
43 teamwork, or decision-making.  
44  
45  
46  
47  
48  
49

### 50 **Information sources**

51  
52 We searched for peer-reviewed, English language studies using three academic databases; Medline,  
53  
54 Embase and Emerald Management. The search was limited to empirical research published between 1<sup>st</sup>  
55  
56 January 2005 and 7th June 2017.  
57  
58  
59  
60

## Search

The search was designed, in collaboration with a professional research librarian, to capture both the executive leadership and the medical practitioner role. Seven terms were included for executive leadership and linked using the Boolean operator OR to maximise the sensitivity of the search: “executive”, “leader”, “leadership”, “manager”, “director”, “CEO”, or “board”. For the role of medical practitioner, terms including “physician”, “clinician”, and “doctor” are used sometimes interchangeably in the literature. Thus we searched for all three terms using the OR operator. The searches were combined, and refined using a proximity operator. Full search strategies are presented in Table 1.

**Table 1. Medline, Embase and Emerald Management search strategies**

| Database        | Medline                                                                                                                                                                              | Results        |
|-----------------|--------------------------------------------------------------------------------------------------------------------------------------------------------------------------------------|----------------|
| <b>Strategy</b> | <b>Searches</b>                                                                                                                                                                      | <b>Results</b> |
| #1              | ((executive\$ or leader\$ or leadership\$ or manager\$ or director\$ or CEO\$ or board\$) adj3 (physician\$ or doctor\$ or clinician\$)).ab.                                         | 4,158          |
| #2              | Limit #1 to (English language and yr="2005 - Current")                                                                                                                               | 2,037          |
| #3              | *Physician Executives/                                                                                                                                                               | 4,069          |
| #4              | Limit #3 to (English language and yr="2005 - Current")                                                                                                                               | 1,461          |
| #5              | #2 or #4                                                                                                                                                                             | 3,395          |
| Database        | Embase                                                                                                                                                                               | Results        |
| <b>Strategy</b> | <b>Searches</b>                                                                                                                                                                      | <b>Results</b> |
| #1              | ((executive\$ or leader\$ or leadership\$ or manager\$ or director\$ or CEO\$ or board\$) adj3 (physician\$ or doctor\$ or clinician\$)).ab.                                         | 5,766          |
| #2              | Limit #1 to (English language and yr="2005 - Current" and article)                                                                                                                   | 1,913          |
| Database        | Emerald Management                                                                                                                                                                   | Results        |
| <b>Strategy</b> | <b>Searches</b>                                                                                                                                                                      | <b>Results</b> |
|                 | ((executive* or leader* or leadership* or manager* or director* or CEO* or board*) and (physician* or doctor* or clinician*)).ab. Limit publication date to January 2005 - June 2017 | 454            |

## Study selection

Search results were aggregated and imported to an EndNote library, and duplicate entries were removed. Pairs of reviewers (RCW:LT; KL:ZL) cross-checked 110 (approximately 3%) of the citation titles and abstracts in a double review in order to establish inter-rater reliability. Articles were excluded based on the following criteria: pre-2005; language other than English; non-peer-reviewed literature; setting

1 other than healthcare; non-primary research including systematic reviews; and does not include  
2 participants who are both doctors and leaders. Any discrepancies between the reviewers were  
3 discussed until a consensus was reached. The remaining citations were randomly assigned to the four  
4 reviewers who independently assessed titles and abstracts against the exclusion criteria, with regular  
5 discussions held at team meetings. While we did not include literature reviews, we snowballed the  
6 reference section of any review identified, searching for additional papers that might meet inclusion  
7 criteria. The selected articles were then subject to a full-text review where further criteria were added  
8 to the exclusion criteria: full-text unavailable; neither medical background/training or leadership is  
9 assessed as a variable in the data analysis; does not include organisational and/or patient outcomes.  
10  
11  
12  
13  
14  
15  
16  
17  
18  
19  
20  
21  
22  
23

#### 24 **Data collection process and data items**

25  
26 Data from the included studies were extracted into a locally developed form for analysis. Elements  
27 extracted were: a) the full reference, b) location, c) language, d) period of data collection, e) study type,  
28 f) study primary and secondary aims, g) exclusion criteria, h) data: total number of organisations, type of  
29 organisations, data types and sources used to performance and/or outcomes, methodological/statistical  
30 approach to identify performance and/or outcomes, i) methods: methods used to study  
31 contextual/success factors associated with medical leaders (e.g., interview, survey, observation),  
32 participants, and data analysis methods, j) findings: quantitative results and qualitative results or  
33 contextual factors most important for explaining relationship between medical background of leader  
34 and performance, and k) implications.  
35  
36  
37  
38  
39  
40  
41  
42  
43  
44  
45  
46  
47  
48  
49

#### 50 **Risk of bias**

51  
52 Risk of bias within studies was assessed using criteria developed by Hawker, et al.<sup>26</sup> Ratings were  
53 assigned (poor, fair, good) across nine different categories: 1) abstract and title, 2) introduction and  
54 aims, 3) method and data, 4) sampling, 5) data analysis, 6) ethics and bias, 7) results, 8) transferability or  
55 generalisability, 9) implications and usefulness. Risk of bias potentially affecting the cumulative evidence  
56  
57  
58  
59  
60

1 across studies was determined by examining study methods, ethics committee approvals, study funding,  
2  
3 and authors' conflicts of interest.  
4  
5  
6

## 7 **Synthesis of results**

8  
9  
10 Results were analysed through a narrative synthesis of extracted data.<sup>27</sup> Extracted data were coded and  
11  
12 organised to explore connections between data elements and to develop sets of concepts. Segments of  
13  
14 data were then linked in a formal fashion, to determine relationships that may exist between different  
15  
16 data elements and allow themes to emerge.  
17  
18  
19

## 20 **RESULTS**

### 21 **Study selection**

22  
23  
24 The search results and review process are presented in Figure 1, using the Preferred Reporting Items for  
25  
26 Systematic Review and Meta-analyses (PRISMA) flow chart. The search performed on Medline  
27  
28 (n=3,395), Embase (n=1,913) and Emerald Management (n=454) yielded a total of 3,926 articles after  
29  
30 the removal of 1,849 duplicates. To test inter-rater reliability, we used Cohen's Kappa and found high  
31  
32 levels of agreement between the paired reviewers for the 3% double-review,  $K=.78$  ( $p<.0001$ ) for pair 1  
33  
34 and  $K=.88$  ( $p<.0001$ ) for pair 2. The remaining screening of title and abstract resulted in 113 studies  
35  
36 eligible for full-text review. The full-text review stage lead to the inclusion of 22 quantitative, qualitative  
37  
38 or mixed method studies in the penultimate pool. After an additional exclusion criterion was added,  
39  
40 requiring that included studies provide data to allow a comparison of medical and non-medical  
41  
42 leadership, eight more studies were eliminated. The literature search identified five literature reviews  
43  
44 on topics associated with medical leadership.<sup>8 14 28-30</sup> The references of these five reviews were searched  
45  
46 for additional studies that met inclusion criteria. Two additional studies were identified as a result of this  
47  
48 process, resulting in a final inclusion of 16 studies.  
49  
50  
51  
52  
53  
54  
55  
56  
57  
58  
59

### 60 **Study characteristics**



1 The characteristics of the 16 studies that met inclusion criteria are presented in Supplementary Table 1.  
2  
3 Fourteen studies conducted quantitative analysis: ten studies analysed questionnaire survey data;<sup>7 31-39</sup>  
4  
5 one study (Jiang et al.<sup>33</sup>) also provided processes of care data, and another provided hospital  
6  
7 performance data (Saleh et al.<sup>38</sup>). Two studies analysed US Statewide Health Planning and Development  
8  
9 data from California,<sup>40 41</sup> one study analysed data from the AMADEUS database and hospital and  
10  
11 insurance documents,<sup>42</sup> and another study analysed UK hospital trust data.<sup>43</sup> One study conducted a  
12  
13 qualitative analysis of interview and observation data,<sup>44</sup> and another conducted a mixed method  
14  
15 analysis,<sup>45</sup> which combined findings from a review of hospital documents with qualitative analysis of  
16  
17 interviews with hospital CEOs and board members. Seven studies were from the USA; the remainder  
18  
19 were from Finland (2), Germany (2), the UK (1) Ireland (1), Norway (1), Lebanon (1) and Australia (1).  
20  
21  
22  
23  
24  
25  
26

### 27 **Results of individual studies**

28  
29 Six studies reported on the performance of hospital boards.<sup>33 40-43 45</sup> Veronesi et al.<sup>43</sup> examined the  
30  
31 impact of clinicians appointed to the boards of 102 English NHS hospital trusts on quality of hospital  
32  
33 care provided from 2006 to 2009. Composition of boards was determined from hospital trust annual  
34  
35 reports. Compliance with health and well-being, clinical effectiveness, safety and patient focus, and ease  
36  
37 and equity of access care standards was obtained from the UK Healthcare Commission and Dr Foster (a  
38  
39 commercial provider of healthcare benchmarking data). A greater percentage of doctors on boards was  
40  
41 associated with a better-quality rating of service providers. Trusts achieving a four rating had an average  
42  
43 of 15.01% of directors with a medical background, whereas in trusts achieving only a one rating, 11.09%  
44  
45 board directors were doctors. This finding was confirmed in relation to lower morbidity rates and tests  
46  
47 to exclude the possibility of reverse causality, whereby doctors joined the boards of better performing  
48  
49 trusts. No equivalent association was found for clinical professions such as nurses and other allied  
50  
51 health professions.  
52  
53  
54  
55

56  
57 De Andrade<sup>41</sup> investigated whether having board members with medical expertise in 281 USA hospitals  
58  
59 affected the levels of uncompensated care provided. A quantitative analysis of data from the California  
60

1 Office of Statewide Health Planning and Development between 1997 and 2010 found that doctors'  
2 board membership was not related to provision of uncompensated care, except when the hospital's  
3 ownership status was taken into account. Relative to non-profit and public hospitals, for-profit hospitals  
4 provided more uncompensated care the higher the percentage of doctors on the board. For an average  
5 for-profit board size of ten members, substituting one member by a doctor increased the amount of  
6 uncompensated care provided by 19%.

7  
8  
9  
10  
11  
12  
13  
14 On the theme of boards, Prybil<sup>45</sup> sought to determine whether high-performing and mid-range hospitals  
15 differ in board structures, processes, and practices. High performance hospitals included at least three  
16 of the Solucient Center for Healthcare Improvement's '100 Top Hospitals' in 1999-2003. A mixed  
17 method analysis of hospital documents and interviews with hospital CEOs and board members was  
18 conducted for seven matched pairs of USA hospitals, finding that doctors form a larger component of  
19 the boards of high performing hospitals (30.3%) than of midrange hospitals (20.8%). Doctors comprised  
20 25% or more of the boards' voting members in five of the seven high performing hospitals, but only one  
21 midrange hospital.

22  
23  
24  
25  
26  
27  
28  
29  
30  
31  
32  
33 Jiang et al.<sup>33</sup> examined whether differences exist in quality performance of 490 USA hospitals in relation  
34 to adoption of particular practices in board oversight of quality. Data consisted of 1) a survey of 562  
35 hospital CEOs on board practices, (2) process of care measures for three clinical conditions (heart attack,  
36 heart failure, pneumonia), and (3) outcomes measures, consisting of risk adjusted mortality rates, for  
37 the same three conditions. Sixty percent of participating hospitals had a Chief Medical Officer or Vice  
38 President of Medical Affairs on the committee; this resulted in significantly higher process of care scores  
39 (85.3% vs 81.0%,  $p < 0.05$ ) and lower risk adjusted mortality rates (5.6% vs 7.3%,  $p < 0.05$ ) than hospitals  
40 that did not have a Chief Medical Officer or Vice President of Medical Affairs as a committee member.  
41 Eighty three percent of participating hospitals had medical staff on the committee; this resulted in  
42 significantly higher process of care scores (84.2% vs 80.9%,  $p < 0.05$ ) but no difference in risk adjusted  
43 mortality rates. Sixty three percent of participating hospitals had a clinical board member on the  
44  
45  
46  
47  
48  
49  
50  
51  
52  
53  
54  
55  
56  
57  
58  
59  
60

1 committee; this resulted in no difference in process of care scores but significantly lower risk-adjusted  
2 mortality rates (5.7% vs 7.2%,  $p < 0.05$ ).

3  
4  
5 Bai and Krishnan<sup>40</sup> examined whether hospitals without medical participation on their boards of  
6  
7 directors delivered lower quality of care in 142 non-profit hospitals in the USA. Quantitative data were  
8  
9 obtained from the US Hospital Quality Alliance and the California Office of Statewide Health Planning  
10  
11 and Development. The study found that boards without medical members were associated with a  
12  
13 decrease of three to five percentage points in quality of care for heart failure, pneumonia, and surgery  
14  
15 infection prevention.

16  
17  
18  
19 Moving to Germany, Kuntz et al.<sup>42</sup> examined differences in the financial performance of hospitals with  
20  
21 regard to ownership by studying the size and composition of supervisory boards in 175 hospital  
22  
23 companies operating 246 hospitals (14% of all German acute care hospitals in 2009). The study reported  
24  
25 on a quantitative analysis of hospital financial performance data (from the AMADEUS database) and  
26  
27 information on hospital and board characteristics (from business and quality reports, hospital websites  
28  
29 and health insurers). Data were obtained from all participants in 2009, and from a subsample of 163  
30  
31 hospital companies in 2010. Financial performance was based on four measures: return on assets (ROA),  
32  
33 earnings before interest and tax (EBIT) margin, total profit margin, and net income. Doctors comprised,  
34  
35 on average, 11.7% board members. Financial performance, and board size and composition depended  
36  
37 on ownership ( $p < .01$  for ROA and  $p < .001$  for the other four performance measures). An increase in  
38  
39 board size and greater political participation were negatively associated with all five tested measures of  
40  
41 financial performance, an increase in nurse and economist participation was negatively associated with  
42  
43 financial performance, and no associations were found for clerical participation. An increase in physician  
44  
45 participation, however, was positively associated with a 5% increase in ROA ( $p = .061$ ).

46  
47  
48  
49 Two studies reported on doctors' involvement in strategic decision making.<sup>37 38</sup> Parayitam et al.<sup>37</sup>  
50  
51 examined the self-reported outcomes of decisions when physician executives were involved in strategic  
52  
53 decision-making (SDM) processes in 109 USA hospitals. Hypotheses were that increased numbers of  
54  
55  
56  
57  
58  
59  
60

1 doctors involved in strategic decision-making teams would be associated with better decisions, greater  
2 understanding of the rationale of decisions, and more commitment to decisions. The sample of 114  
3 CEOs and 254 strategic decision makers (executive officers, director of human resources, chief technical  
4 offices, chiefs of staff, personnel involved in facilities, maintenance) completed a survey reporting their  
5 decision quality, understanding, and commitment. Structural equation modelling of the data suggested  
6 that the ratio of doctors was positively correlated with decision understanding, commitment and  
7 quality.  
8

9  
10 Saleh et al.<sup>38</sup> explored the use of strategic planning processes in 79 (56.4%) Lebanese hospitals, and  
11 investigated its association with financial performance. Hypotheses included that the level of physician  
12 involvement in the strategic planning process is positively associated with hospital performance.  
13 Quantitative analysis of survey data on hospital-reported participation in strategic planning processes,  
14 and hospital performance data from the Lebanese Ministry of Public Health (occupancy rate and  
15 revenue-per-bed) found that there was no association between the level of physician involvement in the  
16 strategic planning process and hospital outcomes; generally, physician involvement was low (4.1 out of  
17 a possible score of 7).  
18

19  
20 Two studies reported on medical leadership of organisations.<sup>7,32</sup> In the USA, Colla et al.<sup>7</sup> measured how  
21 doctor-led organisations compared with other Accountable Care Organisations (ACOs) in terms of  
22 structure, size and care provided, and explored the degree of doctor engagement in managing ACOs.  
23 ACOs are groups of providers that are jointly responsible for caring for a nominated population of  
24 patients. Fifty one percent of the 173 ACOs in the study self-identified as doctor-led, 33% as jointly led  
25 by hospital and doctor, and the remainder were led by hospitals or other entities. Doctor-led ACOs were  
26 found to be more likely to have advanced IT capabilities and better outpatient care than non-doctor-led  
27 ACOs, and were more likely to measure and report financial performance at practice and clinicians  
28 levels; however this finding was confounded by the fact that doctor-led ACOs are less likely to include  
29 hospitals and more likely to include physician groups. Performance of ACOs was not assessed, therefore  
30  
31  
32  
33  
34  
35  
36  
37  
38  
39  
40  
41  
42  
43  
44  
45  
46  
47  
48  
49  
50  
51  
52  
53  
54  
55  
56  
57  
58  
59  
60

1 it was not possible to determine whether performance was related to whether leaders were doctors or  
2  
3 non-medical managers.

4  
5 Goodall<sup>32</sup> examined the relationship between hospital performance and whether the Chief Executive  
6  
7 Officer (CEO) was a doctor or a non-medical manager. Hospital performance was determined by media-  
8  
9 generated league tables, produced by US News and World Report's (USNWR) 'Best Hospitals' in 2009.  
10  
11 Three hundred healthcare executives from three specialties (cancer, digestive disorders, heart and heart  
12  
13 surgery) were surveyed in the top 100 USA hospitals. Positive association was found between physician  
14  
15 CEOs and hospital performance for all three hospital specialties ( $p < 0.001$ ). While higher performing  
16  
17 hospitals were associated with physician CEOs, causation was not able to be determined (e.g., higher  
18  
19 performing hospitals may just prefer to have doctors as leaders).  
20  
21  
22

23  
24 Five studies reported on medical leadership within organisations.<sup>31 34 35 39 44</sup> Konu and Viitanen<sup>34</sup>  
25  
26 investigated the incidence of shared leadership among 433 middle-level managers (e.g., chief doctors,  
27  
28 nursing directors) in social service and healthcare in Finland. Quantitative analysis of survey data on  
29  
30 leadership practices found that shared leadership practices were more common among managers  
31  
32 without a medical background.  
33  
34

35  
36 Another study sought to determine whether evaluations on the impact of knowledge sources affecting  
37  
38 their decision-making differ depending on the manager's professional background, activity sector,  
39  
40 gender, management experience, or age, among 404 middle-level social and healthcare managers in a  
41  
42 Finnish hospital (Simonen et al<sup>39</sup>). Quantitative analysis of survey data revealed that managers who  
43  
44 were also doctors more strongly perceived that their decision-making was influenced by their own  
45  
46 professional experience, journals and scientific research within their own professional field, and  
47  
48 nationwide interaction within their own profession. Differences were found between doctor managers  
49  
50 and nurse managers with respect to organization documents and publications, which carried more  
51  
52 weight in nurse managers' decision-making. No differences were found between managers of different  
53  
54 professional backgrounds regarding other knowledge sources.  
55  
56  
57  
58  
59  
60

1 In other work, Agarwal et al.<sup>31</sup> sought to determine whether there is a positive association between  
2  
3 Management Practices Score (MPS) and the level of clinical education of managers in 42 Australian  
4  
5 acute care public hospitals. The MPS for each hospital was calculated from interview responses of 116  
6  
7 managers to a survey of 21 hospital management practices across multiple dimensions. The study found  
8  
9 no association between the number of doctors in each hospital and the MPS ( $p=0.779$ ). The coefficient  
10  
11 on the level of skills and education within hospitals, however, was positive and significant ( $p=0.06$ ),  
12  
13 indicating that hospitals with a higher proportion of clinically qualified and skilled managers perform  
14  
15 significantly better in management practices.  
16  
17

18  
19 Spehar et al.<sup>44</sup> investigated how clinicians' professional background influences their transition into the  
20  
21 managerial role and identity as clinical managers in four public hospitals and two health trusts in  
22  
23 Norway. Interviews were conducted with 30 clinician managers (13 doctors), 20 of these were also  
24  
25 observed in management and staff meetings during the day. Qualitative analysis of interview and  
26  
27 observation data revealed that doctors experienced difficulties in reconciling the clinical and  
28  
29 management role and used clinical work to gain legitimacy and respect from medical colleagues. In  
30  
31 contrast, nurses experienced a faster and more positive transition into the manager role, and were  
32  
33 more fully engaged in the managerial aspects of the role.  
34  
35  
36

37  
38 Moving countries again, Kuntz et al.<sup>35</sup> assessed the relationship between the amount of medical  
39  
40 involvement in leadership and staff-to-patient ratios. The study was conducted in Germany, where  
41  
42 hospitals are managed by an executive leadership team consisting of a commercial director, medical  
43  
44 director and nursing director. The study was controlled for the size and case mix of the 604 participating  
45  
46 hospitals, whether they were public or private, the degree to which they were rural, and whether the  
47  
48 doctors were salaried or contracted. High staff-to-patient ratios for both nurses and doctors are  
49  
50 associated with better hospital performance.<sup>46 47</sup> The study found a relationship between full-time  
51  
52 Medical Director (MD) or heavily involved part-time MD and a higher staff-to-patient ratio. Full time  
53  
54 MDs significantly improved the staff-to-patient ratios for both doctors and nurses (doctors 1.96,  $p<0.01$ ;  
55  
56 nurses: 4.44,  $p<0.01$ ), whereas part-time MDs only improved the staff-to-patient ratios for doctors (e.g.,  
57  
58  
59  
60

1 an increase of part-time involvement from 15 to 25%, resulted in an increase of 2.49 doctors per  
 2  
 3 thousand inpatients).

4  
 5 Staying in Europe, O'Keefe<sup>36</sup> measured and compared risk aversion in 788 Irish clinicians, clinical  
 6  
 7 managers, non-clinical managers, and non-clinical public representatives, in terms of willingness to  
 8  
 9 discharge a patient from the Emergency Department (ED). The study found no significant difference  
 10  
 11 between clinicians and clinician managers, but found significant differences between clinicians and non-  
 12  
 13 clinicians (including between clinical and non-clinical managers), with the non-clinical participants being  
 14  
 15 more risk averse. Limitations included: (1) there was a large variation in risk tolerance, even between  
 16  
 17 clinicians, (2) it was a single study in a single country, and (3) clinicians are likely to be more familiar  
 18  
 19 both with actual events depicted in the scenarios, and also with the process of making treatment  
 20  
 21 choices that may result in death. The study did not provide indication of an objectively appropriate level  
 22  
 23 of risk, but the authors suggested that the clinicians had a more pragmatic approach to decision-making.  
 24  
 25  
 26  
 27  
 28  
 29  
 30

### 31 Risk of bias

32  
 33 While studies were generally well-designed and executed, generalisability and implications, and  
 34  
 35 usefulness of the findings, was low (Table 2).<sup>26</sup> There was a risk of bias across studies, in that the  
 36  
 37 majority (12) studies collected self-reported data on aspects of medical management, e.g., surveys or  
 38  
 39 interviews, rather than objective data. Many of the studies did not report ethics approval, study funding  
 40  
 41 or authors' conflicts of interests.  
 42  
 43  
 44  
 45  
 46  
 47

48 **Table 2. Methodology rigour and risk of bias**

| 49 Study                                 | 50 Abstract and title | 51 Introduction and aims | 52 Method and data | 53 Sampling | 54 Data analysis | 55 Ethics and bias | 56 Findings | 57 Generalisability | 58 Implications and usefulness |
|------------------------------------------|-----------------------|--------------------------|--------------------|-------------|------------------|--------------------|-------------|---------------------|--------------------------------|
| 59 Agarwal et al. (2016) <sup>31</sup>   | Good                  | Good                     | Good               | Fair        | Fair             | Good               | Good        | Fair                | Good                           |
| 60 Bai and Krishnan (2015) <sup>40</sup> | Fair                  | Good                     | Good               | Good        | Good             | Fair               | Good        | Fair                | Good                           |

|    |                                        |      |      |      |      |           |           |      |      |      |
|----|----------------------------------------|------|------|------|------|-----------|-----------|------|------|------|
| 1  | Colla et al. (2014) <sup>7</sup>       | Fair | Fair | Good | Good | Poor      | Poor      | Good | Good | Fair |
| 2  |                                        |      |      |      |      |           |           |      |      |      |
| 3  | De Andrade (2014) <sup>41</sup>        | Fair | Good | Good | Good | Good      | Fair      | Good | Fair | Good |
| 4  |                                        |      |      |      |      |           |           |      |      |      |
| 5  | Goodall (2011) <sup>32</sup>           | Fair | Fair | Fair | Poor | Fair      | Poor      | Fair | Poor | Poor |
| 6  |                                        |      |      |      |      |           |           |      |      |      |
| 7  | Jiang et al. (2009) <sup>33</sup>      | Fair | Fair | Fair | Fair | Fair      | Fair      | Fair | Fair | Fair |
| 8  |                                        |      |      |      |      |           |           |      |      |      |
| 9  | Konu and Viitanen (2008) <sup>34</sup> | Good | Good | Good | Good | Good      | Very poor | Good | Fair | Fair |
| 10 |                                        |      |      |      |      |           |           |      |      |      |
| 11 | Kuntz et al. (2013) <sup>35</sup>      | Fair | Good | Good | Good | Good      | Good      | Good | Fair | Fair |
| 12 |                                        |      |      |      |      |           |           |      |      |      |
| 13 | Kuntz et al. (2016) <sup>42</sup>      | Good | Good | Good | Good | Good      | Fair      | Good | Fair | Fair |
| 14 |                                        |      |      |      |      |           |           |      |      |      |
| 15 | O'Keefe (2015) <sup>36</sup>           | Good | Fair | Fair | Good | Good      | Good      | Fair | Fair | Poor |
| 16 |                                        |      |      |      |      |           |           |      |      |      |
| 17 | Parayitam et al. (2007) <sup>37</sup>  | Good | Good | Good | Good | Good      | Fair      | Good | Fair | Good |
| 18 |                                        |      |      |      |      |           |           |      |      |      |
| 19 | Prybil (2006) <sup>45</sup>            | Fair | Good | Fair | Fair | Fair      | Fair      | Fair | Fair | Fair |
| 20 |                                        |      |      |      |      |           |           |      |      |      |
| 21 | Saleh et al. (2013) <sup>38</sup>      | Good | Fair | Good | Good | Good      | Fair      | Good | Fair | Fair |
| 22 |                                        |      |      |      |      |           |           |      |      |      |
| 23 | Simonen et al. (2009) <sup>39</sup>    | Good | Good | Good | Good | Good      | Fair      | Good | Fair | Fair |
| 24 |                                        |      |      |      |      |           |           |      |      |      |
| 25 | Spehar et al. (2015) <sup>44</sup>     | Fair | Fair | Good | Good | Good      | Good      | Good | Good | Fair |
| 26 |                                        |      |      |      |      |           |           |      |      |      |
| 27 | Veronesi et al. (2013) <sup>43</sup>   | Fair | Good | Good | Good | Very Good | Good      | Good | Good | Good |
| 28 |                                        |      |      |      |      |           |           |      |      |      |

Scale: Very Good; Good; Fair; Poor; Very Poor. Adapted from Hawker et al.<sup>26</sup>

### Study Synthesis

Extracted data were cross-checked for accuracy and coded by four researchers (ZL, KL LT, RC-W). One researcher (RC-W) completed a narrative synthesis of the coded data, by linking the data to form five interrelated themes: impact of medical leadership on outcomes; doctors on boards; contribution of qualifications and experience; the leader as an individual or part of a team; and doctors transitioning into the medical leadership role. Four broad categories of articles were found in the literature search: (1) individual perspectives on medical leadership (the majority of excluded articles), frequently based on



1 personal experience; (2) empirical research based on self-reported data about medical leadership  
2  
3 (surveys, interviews, focus groups); (3) objective empirical research on the role or characteristics of  
4  
5 healthcare leaders (observations, other data); and (4) objective empirical research on the relationship  
6  
7 between medical leaders and outcomes (hospital performance data, patient outcomes).  
8  
9

## 10 11 12 **DISCUSSION**

### 13 14 **Summary of evidence**

#### 15 16 *Themes*

17  
18  
19 *Impact of medical leadership on outcomes.* Given the complexity encountered within modern  
20  
21 healthcare organisations,<sup>48</sup> it is difficult to demonstrate the impact of leadership on outcomes - even  
22  
23 when assessing medical and non-medical leadership in the same setting. Four of the sixteen studies  
24  
25 showed either no difference or a negative relationship between medical and non-medical leadership in  
26  
27 the aspects of performance that they investigated.<sup>34 38 39 44</sup> The remaining 12 studies found that there  
28  
29 were differences between medical and non-medical managers, and eight of these studies<sup>7 32 33 40-43 45</sup>  
30  
31 correlated findings with hospital performance or patient outcomes. The studies did not provide  
32  
33 sufficient information that would allow us to determine *why* medical leadership might make a  
34  
35 difference. Other than board composition (discussed below), there were few common areas of  
36  
37 investigation, with studies examining varied topics: risk aversion, IT adoption, patient care  
38  
39 arrangements, financial reporting, staff-to-patient ratios, and so on.  
40  
41  
42  
43  
44

45  
46 *Doctors on boards.* We found that evidence supporting the relationship between doctors' board  
47  
48 participation and organisational performance is accumulating, with empirical studies from the UK,<sup>43</sup>  
49  
50 Europe<sup>42</sup> and the USA<sup>33 40 41 45</sup> all reporting positive associations. This finding is consistent with pre-2005  
51  
52 data,<sup>49 50</sup> and supported by a recent literature review on the topic.<sup>30</sup>  
53  
54

55  
56 *Contribution of qualifications and experience.* None of the studies provided data on the characteristics  
57  
58 of medical leaders that were associated with higher performance. We know that doctors who receive  
59  
60 leadership or management training may perform well in leadership roles. Xirasagar et al.<sup>51 52</sup> for

1 example, when examining the relationship between leadership styles, training, and effectiveness of  
2  
3 doctors who are managers, concluded that doctors who completed graduate managerial training such  
4  
5 as Masters of Business Administration (MBA), Masters of Health Administration (MHA), or Masters of  
6  
7 Public Health (MPH) degrees, or more than 30 days of in-service training, were likely to be more  
8  
9 effective leaders. In the included studies there was no demographic information on the leaders who  
10  
11 participated in the study to enable us to disentangle the contribution to the findings of medical  
12  
13 qualifications, medical experience or management experience. While our included studies found both  
14  
15 positive<sup>43</sup> and negative<sup>34 39 44</sup> differences between a leader's medical and nursing background in relation  
16  
17 to leadership outcomes, much of the literature conflates doctors and nurses into a single group of  
18  
19 'clinicians'.<sup>29</sup>

20  
21  
22  
23  
24 *Medical leader as an individual or part of a team.* Only two studies<sup>7 32</sup> explored the performance of the  
25  
26 doctor as the CEO or primary organisation leader, and both found that there was an association  
27  
28 between medical leadership and organisational performance. The remaining studies explored outcomes  
29  
30 when a doctor was included as part of the leadership team. While not providing direct evidence  
31  
32 supporting the doctor as *the* leader, they emphasise current thinking about the need to engage doctors  
33  
34 in healthcare leadership to improve organisational culture and patient outcomes.<sup>53 54</sup> In a comparison of  
35  
36 six high and low performing UK trusts, for example, Mannion et al. found that poor performing  
37  
38 organisations were characterised by cultures where a few senior consultants exerted a disproportional  
39  
40 influence over organisational priorities.<sup>55</sup> Doctors who are engaged as part of a leadership team are  
41  
42 often hybrid managers, who retain a clinical role, and studies elsewhere have found these managers less  
43  
44 likely to be effective in their non-clinical leadership role.<sup>56</sup> Kippist and Fitzgerald,<sup>12</sup> for example, found  
45  
46 that hybrid managers would prioritise clinical work over management, leading to additional burden on  
47  
48 their managerial colleagues, thereby questioning the effectiveness of the hybrid clinician manager.  
49  
50 Spehar et al.<sup>24</sup> explored influences and strategies employed by 30 hybrid leaders in four hospitals in  
51  
52 Norway and concluded that doctors who were managers could not influence other doctors without  
53  
54 drawing on professional power, and that doctors felt they had to maintain their clinical skills to retain

1 credibility among peers. This emphasis on professional skill constrained doctors from drawing effectively  
2  
3 on positional power. This expert power was not retained and had to be continuously regenerated. In  
4  
5 addition, rather than collaborating, doctors saw clinician managers of other departments as  
6  
7 competitors, and saw themselves as representatives of their own professional group.  
8

9  
10 *Doctors transitioning into the medical leadership role.* The five studies reporting on medical leadership  
11  
12 within organisations touched on some of the barriers or enablers<sup>57</sup> for doctors seeking to enter  
13  
14 management, including difficulties reconciling the clinical and management role. Professional and  
15  
16 organisational culture strongly influences the roles that practitioner leaders can take up and the  
17  
18 influence they can wield.<sup>58</sup> Ham et al.<sup>59</sup> investigated, via 22 qualitative interviews, the experiences of  
19  
20 doctors who become Chief Executives of UK National Health Service organisations and found that  
21  
22 medical managers tended to be “keen amateurs” rather than trained managerial professionals. Kisa and  
23  
24 Ersoy,<sup>60</sup> via a 31 item time management questionnaire, found that medical managers have poor time  
25  
26 management skills. Medical managers are not usually trained in leadership,<sup>11 59</sup> which may explain both  
27  
28 these findings and some of the negative perceptions of doctors as managers. There are also some  
29  
30 indications within our included studies that doctors should adopt a more multidisciplinary approach to  
31  
32 be effective leaders.<sup>34 39 44</sup> West and Barron<sup>61</sup> found that medical managers consult or network mostly  
33  
34 with other medical managers, and that it is the non-medical managers who act as brokers between  
35  
36 professional groups. This finding is supported by other work in the field.<sup>62</sup>  
37  
38  
39  
40  
41  
42  
43  
44

### 45 **Limitations**

46  
47 Our review was limited in date range and language (English only), and we found insufficient studies  
48  
49 meeting inclusion criteria to enable our research question to be robustly answered, hence the decision  
50  
51 to craft a narrative review. Most studies examined only one or two aspects of leadership; because these  
52  
53 aspects were different across studies, it was not possible to generalise the findings. Due to the diversity  
54  
55 of keywords and publication venues used by authors of studies on medical leadership, it was difficult to  
56  
57 ensure that all relevant literature has been captured by our search strategy. It is also important to  
58  
59  
60

1 consider that risk of bias was evident across studies due to the majority of studies employing self-  
2 reported measures, and an absence of information concerning ethics approval, funding, or conflicts of  
3 interests in some studies.  
4  
5  
6  
7  
8  
9

## 10 **Conclusions**

11 There is a modest body of evidence supporting the importance of including doctors in the composition  
12 of hospital or organisational governing boards. Despite a large volume of published literature on the  
13 topic of whether hospitals and healthcare organisations perform better when led by doctors, however,  
14 there are few studies that have examined this topic in a robust way or directly compared the  
15 performance of medical and non-medical managers. While we found sixteen studies that provided  
16 empirical data in respect of this question, only two studies explored the role of organisational leader or  
17 CEO. This is an under researched area that requires further funding and focus.  
18  
19  
20  
21  
22  
23  
24  
25  
26  
27  
28  
29  
30

## 31 **FUNDING**

32 This research received no specific grant from any funding agency in the public, commercial or not-for-  
33 profit sectors.  
34  
35  
36  
37  
38  
39  
40

## 41 **COMPETING INTERESTS**

42 The authors have read and understood the *BMJ* policy on declaration of interests and declare that we  
43 have no competing interests.  
44  
45  
46  
47  
48  
49

## 50 **DATA SHARING**

51 The full dataset is available from the corresponding author on request.  
52  
53  
54  
55  
56

## 57 **AUTHORS' CONTRIBUTIONS**

58  
59  
60

1 RC-W and JB conceptualised the study, KL, ZL and LT conducted the database searches. RC-W, KL, ZL and  
2  
3 LT conducted the search and review strategy, RC-W drafted the manuscript, all authors reviewed the  
4  
5 manuscript for critical content.  
6  
7

## 8 REFERENCES

- 10 1. Bruce A, Hill S. Relationships between doctors and managers: the Scottish experience. *Journal of*  
11 *Management in Medicine* 1994;8(5):49-57.
- 12 2. Buchanan D, Jordan S, Preston D, et al. Doctor in the process: the engagement of clinical directors in  
13 hospital management. *Journal of Management in Medicine* 1997;11(3):132-56.
- 14 3. Davies HT, Harrison S. Trends in doctor-management relationships. *British Medical Journal*  
15 2003;326(7390):646.
- 16 4. Griffiths R. NHS management inquiry: report to the Secretary of State for Social Services. *Department*  
17 *of Health and Social Security, London* 1983.
- 18 5. Heyssel RM, Gaintner JR, Kues IW, et al. Decentralized management in a teaching hospital. *New*  
19 *England Journal of Medicine* 1984;310(22):1477-80.
- 20 6. Hoff T. The new breed. *Physician Executive* 1996;23(8):31-36.
- 21 7. Colla CH, Lewis VA, Shortell SM, et al. First national survey of ACOs finds that physicians are playing  
22 strong leadership and ownership roles. *Health Affairs* 2014;33(6):964-71.
- 23 8. Dwyer AJ. Medical managers in contemporary healthcare organisations: a consideration of the  
24 literature. *Australian Health Review* 2010;34(4):514-22.
- 25 9. Bujak J. Physicians in governance: their unique learning curve. *Trustee: the Journal for Hospital*  
26 *Governing Boards* 2005;58(3):28, 30-28, 30.
- 27 10. Fulkerson W, Hartung D. Creating a healthy hospital: the demand for physician executives. *Group*  
28 *Practice Journal* 2006;55(9):41.
- 29 11. Ham C, Dickinson H. Engaging doctors in leadership: a review of the literature. *NHS Institute for*  
30 *Innovation and Improvement, Coventry* 2008.
- 31 12. Kippist L, Fitzgerald A. Organisational professional conflict and hybrid clinician managers: the effects  
32 of dual roles in Australian health care organisations. *Journal of Health Organization and*  
33 *Management* 2009;23(6):642-55.
- 34 13. Mo TO. Doctors as managers: moving towards general management?: The case of unitary  
35 management reform in Norwegian hospitals. *Journal of Health Organization and Management*  
36 2008;22(4):400-15.
- 37 14. Loh E. Doctors as health managers: an oxymoron, or a good idea? *Journal of Work-Applied*  
38 *Management* 2015;7(1):52-60.
- 39 15. Dickinson H, Ham C, Snelling I, et al. Are we there yet? Models of medical leadership and their  
40 effectiveness: an exploratory study. *NIHR Service Delivery and Organisation Programme* 2013.
- 41 16. West M, Armit K, Loewenthal L, et al. Leadership and leadership development in healthcare: the  
42 evidence base. *London: Faculty of Medical Leadership and Management* 2015.
- 43 17. Schneller ES, Greenwald HP, Richardson ML, et al. The physician executive: role in the adaptation of  
44 American medicine. *Health Care Management Review* 1997;22(2):90-96.
- 45 18. Schultz FC, Pal S, Swan DA. Who should lead a healthcare organization: MDs or MBAs? *Journal of*  
46 *Healthcare Management* 2004;49(2):103.
- 47 19. Clay-Williams R, Braithwaite J. Doctors in executive management: a systematic review of the peer-  
48 reviewed literature. Sydney, Australia: Centre for Clinical Governance Research, Australian  
49 Institute of Health Innovation, University of New South Wales 2012.
- 50 20. Braithwaite J, Westbrook MT. A survey of staff attitudes and comparative managerial and non-  
51 managerial views in a clinical directorate. *Health Services Management Research*  
52 2004;17(3):141-66.
- 53  
54  
55  
56  
57  
58  
59  
60

- 1 21. Davies HT, Hodges C-L, Rundall TG. Views of doctors and managers on the doctor-manager  
2 relationship in the NHS. *British Medical Journal* 2003;326(7390):626-28.
- 3 22. Elina V, Juhani L, Tiina T-J, et al. Doctor-managers as decision makers in hospitals and health centres.  
4 *Journal of Health Organization and Management* 2006;20(2):85-94.
- 5 23. Spehar I, Frich JC, Kjekshus LE. Clinicians' experiences of becoming a clinical manager: a qualitative  
6 study. *BMC Health Services Research* 2012;12(1):1.
- 7 24. Spehar I, Frich JC, Kjekshus LE. Clinicians in management: a qualitative study of managers' use of  
8 influence strategies in hospitals. *BMC Health Services Research* 2014;14(1):1.
- 9 25. Martinussen PE, Magnussen J. Resisting market-inspired reform in healthcare: the role of  
10 professional subcultures in medicine. *Social Science & Medicine* 2011;73(2):193-200.
- 11 26. Hawker S, Payne S, Kerr C, et al. Appraising the evidence: reviewing disparate data systematically.  
12 *Qualitative Health Research* 2002;12(9):1284-99.
- 13 27. Popay J, Roberts H, Sowden A, et al. Guidance on the conduct of narrative synthesis in systematic  
14 reviews. *ESRC Methods Programme, UK National Centre for Research Methods* 2006;1:b92.
- 15 28. Dickinson H, Ham C. Engaging doctors in leadership: review of the literature. *Birmingham, University  
16 of Birmingham* 2008.
- 17 29. Pihlainen V, Kivinen T, Lammintakanen J. Management and leadership competence in hospitals: a  
18 systematic literature review. *Leadership in Health Services* 2016;29(1):95-110.
- 19 30. Sarto F, Veronesi G. Clinical leadership and hospital performance: assessing the evidence base. *BMC  
20 Health Services Research* 2016;16(2):169.
- 21 31. Agarwal R, Green R, Agarwal N, et al. Management practices in Australian healthcare: can NSW  
22 public hospitals do better? *Journal of Health Organization and Management* 2016;30(3):331-53.
- 23 32. Goodall AH. Physician-leaders and hospital performance: is there an association? *Social Science &  
24 Medicine* 2011;73(4):535-39.
- 25 33. Jiang H, Lockee C, Bass K, et al. Board oversight of quality: any differences in process of care and  
26 mortality? *Journal of Healthcare Management* 2009;54(1):15.
- 27 34. Konu A, Viitanen E. Shared leadership in Finnish social and health care. *Leadership in Health Services  
28* 2008;21(1):28-40.
- 29 35. Kuntz L, Scholtes S. Physicians in leadership: the association between medical director involvement  
30 and staff-to-patient ratios. *Health Care Management Science* 2013;16(2):129-38.
- 31 36. O'Keefe ST. A cross-sectional study of doctors', managers' and public representatives' views  
32 regarding acceptable level of risk in discharges from the emergency department. *QJM*  
33 2015;108(7):533-38.
- 34 37. Parayitam S, Phelps LD, Olson BJ. Strategic decision-making in the healthcare industry: the effects of  
35 physician executives on decision outcomes. *Management Research News* 2007;30(4):283-301.
- 36 38. Saleh S, Kaissi A, Semaan A, et al. Strategic planning processes and financial performance among  
37 hospitals in Lebanon. *The International Journal of Health Planning and Management* 2013;28(1).
- 38 39. Simonen O, Viitanen E, Lehto J, et al. Knowledge sources affecting decision-making among social and  
39 health care managers. *Journal of Health Organization and Management* 2009;23(2):183-99.
- 40 40. Bai G, Krishnan R. Do hospitals without physicians on the board deliver lower quality of care?  
41 *American Journal of Medical Quality* 2015;30(1):58-65.
- 42 41. De Andrade Costa L. The effect of physician board membership on uncompensated care provision.  
43 *Applied Economics* 2014;46(19):2290-300.
- 44 42. Kuntz L, Pulm J, Wittland M. Hospital ownership, decisions on supervisory board characteristics, and  
45 financial performance. *Health Care Management Review* 2016;41(2):165-76.
- 46 43. Veronesi G, Kirkpatrick I, Vallasca F. Clinicians on the board: what difference does it make? *Social  
47 Science & Medicine* 2013;77:147-55.
- 48 44. Spehar I, Frich JC, Kjekshus LE. Professional identity and role transitions in clinical managers. *Journal  
49 of Health Organization and Management* 2015;29(3):353-66.
- 50 45. Prybil LD. Size, composition, and culture of high-performing hospital boards. *American Journal of  
51 Medical Quality* 2006;21(4):224-29.

- 1 46. Lang TA, Hodge M, Olson V, et al. Nurse–patient ratios: a systematic review on the effects of nurse  
2 staffing on patient, nurse employee, and hospital outcomes. *Journal of Nursing Administration*  
3 2004;34(7-8):326-37.
- 4 47. Pronovost PJ, Angus DC, Dorman T, et al. Physician staffing patterns and clinical outcomes in  
5 critically ill patients: a systematic review. *Journal of the American Medical Association*  
6 2002;288(17):2151-62.
- 7 48. Braithwaite J, Clay-Williams R, Nugus P, et al. Health care as a complex adaptive system. In:  
8 Hollnagel E, Braithwaite J, Wears R, eds. Resilient health care. Surrey, UK: Ashgate Publishing  
9 Limited 2013.
- 10 49. Goes JB, Zhan C. The effects of hospital-physician integration strategies on hospital financial  
11 performance. *Health Services Research* 1995;30(4):507.
- 12 50. Molinari C, Alexander J, Morlock L, et al. Does the hospital board need a doctor? The influence of  
13 physician board participation on hospital financial performance. *Medical Care* 1995:170-85.
- 14 51. Xirasagar S, Samuels ME, Curtin TF. Management training of physician executives, their leadership  
15 style, and care management performance: an empirical study. *American Journal of Managed*  
16 *Care* 2006;12(2):101-8.
- 17 52. Xirasagar S, Samuels ME, Stoskopf CH. Physician leadership styles and effectiveness: An empirical  
18 study. *Medical Care Research and Review* 2005;62(6):720-40.
- 19 53. Sebastian A, Fulop L, Dadich A, et al. Health LEADS Australia and implications for medical leadership.  
20 *Leadership in Health Services* 2014;27(4):355-70.
- 21 54. Smits SJ, Smits SJ, Bowden DE, et al. The role of the physician in transforming the culture of  
22 healthcare. *Leadership in Health Services* 2016;29(3):300-12.
- 23 55. Mannion R, Davies HT, Marshall M. Cultural characteristics of “high” and “low” performing hospitals.  
24 *Journal of Health Organization and Management* 2005;19(6):431-39.
- 25 56. Quinn JF, Perelli S. First and foremost, physicians: the clinical versus leadership identities of  
26 physician leaders. *Journal of Health Organization and Management* 2016;30(4):711-28.
- 27 57. Ramanuj PP, Ryland H, Mitchell EW, et al. In the spotlight: healthcare inspections as an opportunity  
28 for trainee clinicians to be the leaders of today. *BMJ Quality & Safety* 2014;23(8):624-28.
- 29 58. Penlington C, Holmstrom K. Practitioner leadership: a missing link in leadership theory. *The*  
30 *International Journal of Leadership in Public Services* 2013;9(1/2):32-46.
- 31 59. Ham C, Clark J, Spurgeon P, et al. Doctors who become chief executives in the NHS: from keen  
32 amateurs to skilled professionals. *Journal of the Royal Society of Medicine* 2011;104(3):113-19.
- 33 60. Kisa A, Ersoy K. The need for time management training is universal: Evidence from Turkey. *Hospital*  
34 *Topics* 2005;83(1):13-19.
- 35 61. West E, Barron DN. Social and geographical boundaries around senior nurse and physician leaders:  
36 an application of social network analysis. *Canadian Journal of Nursing Research* 2005;37(3):132-  
37 49.
- 38 62. Creswick N, Westbrook J. Examining the socialising and problem-solving networks of clinicians on a  
39 hospital ward. *Conference Proceedings of Social Science Methodology Conference of the*  
40 *Australian Consortium for Social and Political Research (ACSPR)* 2006.

## 41 LIST OF FIGURES

42 Figure 1. Search and review strategy (PRISMA flow diagram)

43

44

45

46

47

48

49

50

51

52

53

54

55

56

57

58

59

60



Figure 1. Search and review strategy (PRISMA flow diagram)

179x317mm (300 x 300 DPI)

33  
34  
35  
36  
37  
38  
39  
40  
41  
42  
43  
44  
45  
46  
47  
48  
49  
50  
51  
52  
53  
54  
55  
56  
57  
58  
59  
60



| Study                                | Country   | Primary aim                                                                                                                                                                                                                                              | Secondary aim                                                                                                                                                                                                     | Participants; Organisation               | Method                                                                                                                        | Performance measures                                                                                                              | Key findings                                                                                                                                                                                                                                                                                                                                                                                                                                                                                                                                                                                                                                                                                                                                                                                                                                                                                                                                                                                                                                           |
|--------------------------------------|-----------|----------------------------------------------------------------------------------------------------------------------------------------------------------------------------------------------------------------------------------------------------------|-------------------------------------------------------------------------------------------------------------------------------------------------------------------------------------------------------------------|------------------------------------------|-------------------------------------------------------------------------------------------------------------------------------|-----------------------------------------------------------------------------------------------------------------------------------|--------------------------------------------------------------------------------------------------------------------------------------------------------------------------------------------------------------------------------------------------------------------------------------------------------------------------------------------------------------------------------------------------------------------------------------------------------------------------------------------------------------------------------------------------------------------------------------------------------------------------------------------------------------------------------------------------------------------------------------------------------------------------------------------------------------------------------------------------------------------------------------------------------------------------------------------------------------------------------------------------------------------------------------------------------|
| Agarwal et al. (2016) <sup>1</sup>   | Australia | To investigate the elements of best management practices in an Australian state-run healthcare system.                                                                                                                                                   | To determine whether there is a positive association between management practices score (MPS) and the level of clinical education of a managers in public hospitals.                                              | 42 acute care public hospitals           | Quantitative analysis of survey data                                                                                          | Management Practices Score (MPS), consisting of 21 hospital management practices across multiple dimensions                       | The coefficient on the level of skills and education within hospitals was positive and significant (p=0.06). Therefore, the authors supported the hypothesis that hospitals with a higher proportion of clinically qualified and skilled managers perform significantly better in management practices.                                                                                                                                                                                                                                                                                                                                                                                                                                                                                                                                                                                                                                                                                                                                                |
| Bai and Krishnan (2015) <sup>2</sup> | USA       | To examine whether hospitals without physician participation on their boards of directors deliver lower quality of care.                                                                                                                                 | N/A                                                                                                                                                                                                               | 142 non-profit hospitals                 | Quantitative analysis of US Hospital Quality Alliance and California Office of Statewide Health Planning and Development data | Process of care quality encompassing four categories (heart attack, heart failure, pneumonia, and surgery infection prevention)   | The absence of physicians on the board was associated with a decrease of 3-5% points in three of four measures of care quality (heart failure, pneumonia, and surgery infection prevention).                                                                                                                                                                                                                                                                                                                                                                                                                                                                                                                                                                                                                                                                                                                                                                                                                                                           |
| Colla et al. (2014) <sup>3</sup>     | USA       | To explore the extent to which physicians are engaged in the leadership of emerging Accountable Care Organisations (ACOs), including whether ACOs identify themselves as physician-led, have boards that are run by physicians, and are physician owned. | To examine how physician-led ACOs compare to other ACOs in terms of structure, size, and services provided. To examine the implications of leadership types for ACO capabilities and the future of the ACO model. | 173 accountable care organisations       | Quantitative analysis of survey data                                                                                          | Care management and technology capabilities                                                                                       | Physician-led organisations had fewer patients per contract than other ACOs.<br><br>Physician-led ACOs had similar care management and health IT capabilities to those of other ACOs, despite having different leadership structures and offering fewer services.<br><br>Physician-led ACOs were leading in outpatient care management and health IT. However, they were falling behind in their ability to manage care across settings.<br><br>Physician-led organisations may face greater challenges than other ACOs in managing transitions between settings of care and managing hospital-based care, as they were less likely to include hospitals or post-acute care facilities.<br><br>Physician-led ACOs were less likely than other ACOs to offer services that are traditionally separate from medical care, such as pharmacy.                                                                                                                                                                                                              |
| De Andrade (2014) <sup>4</sup>       | USA       | To investigate whether having board members with medical expertise affects the levels of uncompensated care provided by hospitals.                                                                                                                       | To verify how the relationship between board member medical expertise and uncompensated care is affected by the hospital's ownership type.                                                                        | 281 hospitals                            | Quantitative analysis of data from the California Office of Statewide Health Planning and Development for 1997-2010           | Uncompensated care provision                                                                                                      | Physician board membership was not related to uncompensated care provision, except when hospital's ownership status was taken into account.<br><br>When hospital ownership type was considered, the percentage of physicians on the board did affect the provision of uncompensated care.<br><br>Relative to non-profit and public hospitals, for-profit hospitals provided more uncompensated care the higher the percentage of physicians on the board. For an average for-profit board size, which has 10 members, substituting one member by a physician increased the amount of uncompensated care provided by 19%.                                                                                                                                                                                                                                                                                                                                                                                                                               |
| Goodall (2011) <sup>5</sup>          | USA       | To determine if there is an association between physician leaders and hospital performance.                                                                                                                                                              | N/A                                                                                                                                                                                                               | 300 healthcare executives; 100 hospitals | Quantitative analysis of survey data                                                                                          | Index of Hospital Quality                                                                                                         | Positive association was found between physician CEO and hospital performance for all three hospital specialties (p<0.001).                                                                                                                                                                                                                                                                                                                                                                                                                                                                                                                                                                                                                                                                                                                                                                                                                                                                                                                            |
| Jiang et al. (2009) <sup>6</sup>     | USA       | To examine whether differences exist in hospitals' quality performance in relation to adoption of particular practices in board oversight of quality.                                                                                                    | N/A                                                                                                                                                                                                               | 562 healthcare executives; 490 hospitals | Quantitative analysis of survey data                                                                                          | Process of care performance and risk-adjusted mortality relating to three conditions (heart attack, heart failure, and pneumonia) | Hospitals that had representatives with clinical expertise serving on the quality board had significantly better performance in process of care and/or mortality.<br><br>Sixty percent of participating hospitals had a Chief Medical Officer or Vice President of Medical Affairs on the committee; this resulted in significantly (p<0.05) higher process of care scores (85.3% vs 81%) and lower risk adjusted mortality rates (5.6% vs 7.3%) than hospitals that did not have a Chief Medical Officer or Vice President of Medical Affairs as committee member.<br><br>Eighty-three percent of participating hospitals had medical staff on the committee; this resulted in significantly (p<0.05) higher process of care scores (84.2% vs 80.9%) but no difference in risk adjusted mortality rates.<br><br>Sixty-three percent of participating hospitals had a clinical board member on the committee; this resulted in no difference in process of care scores but significantly (p<0.05) lower risk adjusted mortality rates (5.7% vs. 7.2%). |

| Study                                 | Country | Primary aim                                                                                                                                                                                                                                                                               | Secondary aim                                                                                                                                                                                                                                                                                                                                                                                                                  | Participants; Organisation                                                                                                                                                                        | Method                                                                                                                                                                                                                    | Performance measures                                                                                                                                                         | Key findings                                                                                                                                                                                                                                                                                                                                                                                                                                                                                                                                                                                                                                                                                                  |
|---------------------------------------|---------|-------------------------------------------------------------------------------------------------------------------------------------------------------------------------------------------------------------------------------------------------------------------------------------------|--------------------------------------------------------------------------------------------------------------------------------------------------------------------------------------------------------------------------------------------------------------------------------------------------------------------------------------------------------------------------------------------------------------------------------|---------------------------------------------------------------------------------------------------------------------------------------------------------------------------------------------------|---------------------------------------------------------------------------------------------------------------------------------------------------------------------------------------------------------------------------|------------------------------------------------------------------------------------------------------------------------------------------------------------------------------|---------------------------------------------------------------------------------------------------------------------------------------------------------------------------------------------------------------------------------------------------------------------------------------------------------------------------------------------------------------------------------------------------------------------------------------------------------------------------------------------------------------------------------------------------------------------------------------------------------------------------------------------------------------------------------------------------------------|
| Konu and Viitanen (2008) <sup>7</sup> | Finland | To investigate the incidence of shared leadership among middle-level managers in social service and health care.                                                                                                                                                                          | N/A                                                                                                                                                                                                                                                                                                                                                                                                                            | 433 middle-level managers in social and healthcare                                                                                                                                                | Quantitative analysis of survey data                                                                                                                                                                                      | Shared leadership practices                                                                                                                                                  | Shared leadership practices were more common among managers without a medical background.                                                                                                                                                                                                                                                                                                                                                                                                                                                                                                                                                                                                                     |
| Kuntz et al. (2013) <sup>8</sup>      | Germany | To assess the influence of the extent to which physicians are involved in hospital leadership on staff- to-patient ratios.                                                                                                                                                                | To investigate the significance of employing a full-time Medical Director (MD) and, for hospitals with a part-time MD, the impact that the amount of time spent in this role has on physician- to- patient-ratio and nurse-to-patient ratio.                                                                                                                                                                                   | 604 hospitals, with a subsample of 442 hospitals                                                                                                                                                  | Quantitative analysis of survey data                                                                                                                                                                                      | Staff-to-patient ratios                                                                                                                                                      | There were significant differences in staff-to-patient ratios between the low level part-time category and the high-level part-time category (physicians: $p < 0.001$ , nurses: $p < 0.001$ ), as well as for the difference between the high level part-time category and the full-time involvement (physicians: $p < 0.001$ , nurses: $p < 0.01$ ). Regression analysis demonstrated a positive association between full-time MDs and staff-to-patient ratios for both physicians and nurses. With the exception of part-time involvement and nurse- to-patient ratio, this association remained strong after controlling for a range of confounding variables (case-mix, size, ownership).                 |
| Kuntz et al. (2016) <sup>9</sup>      | Germany | To explain differences in the financial performance of hospitals with regard to ownership by studying the size and composition of supervisory boards.                                                                                                                                     | To examine three hypotheses:<br>H1: Hospital financial performance depends on ownership.<br>H2: Hospital supervisory board size and composition depend on ownership.<br>H3: The influence of hospital ownership on financial performance is mediated by the size and composition of the supervisory board.                                                                                                                     | 175 hospital companies operating<br>246 hospitals                                                                                                                                                 | Quantitative analysis of hospital financial performance data (from the AMADEUS database) and information on hospital and board characteristics (from business and quality reports, hospital websites and health insurers) | Financial performance, based on four measures (return on assets (ROA), earnings before interest and tax (EBIT) margin, total profit margin, and net income)                  | Financial performance, and board size and composition depended on ownership ( $p < .01$ for ROA and $p < .001$ for the other four performance measures).<br><br>An increase in board size and greater political participation were negatively associated with all five tested measures of financial performance.<br><br>An increase in physician participation was positively associated with one dimension of financial performance, ROA ( $0.05$ , $p = .061$ ).<br><br>An increase in nurse and economist participation was negatively associated with financial performance; no associations were found for clerical participation.                                                                       |
| O'Keefe (2015) <sup>10</sup>          | Ireland | To examine the hypothesis that there would be an increasing gradient of risk aversion from physicians through clinicians in management and managers to public representatives regarding an acceptable level of risk when considering discharging a patient from the emergency department. | N/A                                                                                                                                                                                                                                                                                                                                                                                                                            | 180 consultant physicians, 47 clinicians involved in management, 143 senior healthcare managers and 418 public representatives; acute care hospitals                                              | Quantitative analysis of survey data                                                                                                                                                                                      | Level of acceptable risk                                                                                                                                                     | Post hoc pairwise comparisons (Bonferroni corrected significance level of $P < 0.008$ ) showed no significant differences between physicians and clinician managers or between managers and public representatives in acceptability of risk; however, all pairwise comparisons between doctors and managers or public representatives were significant.<br><br>There were significant differences in the acceptability of risk and a reducing tolerance of a preventable death following discharge from the emergency department between doctors, healthcare managers and public representatives; clinicians with a managerial role did not differ in risk tolerance from their purely clinical counterparts. |
| Parayitam et al. (2007) <sup>11</sup> | USA     | To analyse the outcomes of decisions when physician executives are involved in strategic decision-making processes in healthcare organisations.                                                                                                                                           | To examine three hypotheses:<br>H1: The greater the presence of physician executives in shared decision-making teams (SDMTs) the greater will be the decision quality.<br>H2: The greater the presence of physician executives in SDMTs the greater will be the understanding of the rationale of decisions.<br>H3: The greater the presence of physician executives in SDMTs the greater will be the commitment to decisions. | 109 hospitals, 114 CEOs, 254 strategic decision makers (executive officers, director of human resources, chief technical offices, chiefs of staff, personnel involved in facilities, maintenance) | Quantitative analysis of survey data                                                                                                                                                                                      | Decision outcomes (decision quality, understanding, and commitment)                                                                                                          | The ratio of physicians was positively correlated with decision understanding, commitment and quality.                                                                                                                                                                                                                                                                                                                                                                                                                                                                                                                                                                                                        |
| Prybil (2006) <sup>12</sup>           | USA     | To determine whether board structures, processes, and practices in high-performing hospitals differ from similar hospitals where performance is midrange and, if so, in what ways.                                                                                                        | N/A                                                                                                                                                                                                                                                                                                                                                                                                                            | 7 matched hospital pairs                                                                                                                                                                          | Mixed method analysis of hospital documents and interviews with hospital CEOs and board members                                                                                                                           | High performance hospitals (from the Solucient Center for Healthcare Improvement's '100 Top Hospitals' listings from 1999-2003) matched with midrange performance hospitals. | Medical staff members formed a larger component of the boards of high performing hospitals (30.3%) as compared with the boards of midrange hospitals (20.8%).<br><br>In five of the seven high performing hospitals, medical staff members comprised 25% or more of the boards' voting members. This was true in only one mid-range hospital.                                                                                                                                                                                                                                                                                                                                                                 |
| Saleh et al. (2013) <sup>13</sup>     | Lebanon | To explore the use of strategic planning processes in Lebanese hospitals and to investigate its association with financial performance.                                                                                                                                                   | To examine six hypotheses:<br>H1: The existence of a strategic plan is favorably associated with hospital performance.<br>H2: A more developed strategic plan is                                                                                                                                                                                                                                                               | 79 hospitals (56.4%)                                                                                                                                                                              | Quantitative analysis of survey data and hospital performance data from the Lebanese Ministry of Public Health                                                                                                            | Occupancy rate (OR) and revenue-per-bed (RPB)                                                                                                                                | There was no association between having a strategic plan and either of the two performance measures.<br><br>The extent of strategic plan implementation was adversely related to OR, that is, the more a hospital implemented its                                                                                                                                                                                                                                                                                                                                                                                                                                                                             |

| Study                                | Country | Primary aim                                                                                                                                    | Secondary aim                                                                                                                                                                                                                                                                                                                                                                                                                                                                   | Participants; Organisation                                                                                                                                                              | Method                                                                                                                                                                                                        | Performance measures                                                                                                                                                                                      | Key findings                                                                                                                                                                                                                                                                                                                                                                                                                                                                                                                                                                                                                                                                                                                                                                                                                                                                        |
|--------------------------------------|---------|------------------------------------------------------------------------------------------------------------------------------------------------|---------------------------------------------------------------------------------------------------------------------------------------------------------------------------------------------------------------------------------------------------------------------------------------------------------------------------------------------------------------------------------------------------------------------------------------------------------------------------------|-----------------------------------------------------------------------------------------------------------------------------------------------------------------------------------------|---------------------------------------------------------------------------------------------------------------------------------------------------------------------------------------------------------------|-----------------------------------------------------------------------------------------------------------------------------------------------------------------------------------------------------------|-------------------------------------------------------------------------------------------------------------------------------------------------------------------------------------------------------------------------------------------------------------------------------------------------------------------------------------------------------------------------------------------------------------------------------------------------------------------------------------------------------------------------------------------------------------------------------------------------------------------------------------------------------------------------------------------------------------------------------------------------------------------------------------------------------------------------------------------------------------------------------------|
|                                      |         |                                                                                                                                                | positively associated with hospital performance.<br>H3: Implementation of the strategic plan is positively associated with hospital performance.<br>H4: CEO control of the strategic planning process is positively associated with hospital performance.<br>H5: Strategic planning process is positively associated with hospital performance.<br>H6: The level of physician involvement in the strategic planning process is positively associated with hospital performance. |                                                                                                                                                                                         |                                                                                                                                                                                                               |                                                                                                                                                                                                           | strategic plan, the lower its OR ( $p < 0.05$ ).<br><br>A similar trend was observed with level of governing board involvement in strategic plan development.<br><br>There was no association between the level of physician involvement in the strategic planning process and hospital outcomes; generally, physician involvement was low (4.1 out of a possible score of 7).                                                                                                                                                                                                                                                                                                                                                                                                                                                                                                      |
| Simonen et al. (2009) <sup>14</sup>  | Finland | To determine how social and health care managers evaluate the impact of knowledge sources as affecting their decision-making.                  | To determine whether evaluations differ depending on the manager's professional background, activity sector, gender, management experience, or age.                                                                                                                                                                                                                                                                                                                             | 404 middle-level social and healthcare managers in a hospital                                                                                                                           | Quantitative analysis of survey data                                                                                                                                                                          | Impact of various knowledge sources on decision-making                                                                                                                                                    | Doctor managers more strongly perceived that their decision-making was influenced by their own professional experience, journals and scientific research within their own professional field, and nationwide interaction within their own profession.<br><br>Differences were found between doctor managers and nurse managers with respect to organization documents and publications, which clearly seemed to carry more weight in nurse managers' decision-making.<br><br>Regarding other knowledge sources, i.e., knowledge obtained from one's own subordinates, examples from other corresponding units, patient demands and needs, media statements, municipality/city resident opinions, contracts between municipalities and municipal federations, or one's own professional education, no differences were found between managers of different professional backgrounds. |
| Spehar et al. (2015) <sup>15</sup>   | Norway  | To investigate how clinicians' professional background influences their transition into the managerial role and identity as clinical managers. | N/A                                                                                                                                                                                                                                                                                                                                                                                                                                                                             | Four public hospitals, two health trusts; 30 clinician managers (doctors, nurses, allied health) interviewed, 20 of these were observed in management and staff meetings during the day | Qualitative analysis of interview and observation data                                                                                                                                                        | Managerial role transition and clinical manager identity                                                                                                                                                  | Doctors experienced difficulties in reconciling the clinical and management role and used clinical work to gain legitimacy and respect from medical colleagues.<br><br>Nurses experienced a faster and more positive transition into the manager role, and were more fully engaged in the managerial aspects of the role.                                                                                                                                                                                                                                                                                                                                                                                                                                                                                                                                                           |
| Veronesi et al. (2013) <sup>16</sup> | UK      | To determine how much difference managers will make to performance outcomes.                                                                   | To determine whether the positive outcomes of clinical leadership derive from the participation of all clinicians in boards (including nurses and allied health professions) or only doctors.                                                                                                                                                                                                                                                                                   | 102 NHS hospital trusts in England (60% total)                                                                                                                                          | Quantitative analysis of data from hospital trust annual reports, publicly available performance measures from the Healthcare Commission, and data gathered by Dr Foster over a three-year period (2006-2009) | Quality of the service provided (compliance with core standards concentrating on four main areas: health and well-being, clinical effectiveness, safety and patient focus, and ease and equity of access) | Significant and positive association was found between a higher percentage of clinicians on boards and the quality ratings of service providers (confirmed in relation to lower morbidity rates and tests to exclude the possibility of reverse causality).<br><br>No equivalent association was found for clinical professions such as nurses and other allied health professions.                                                                                                                                                                                                                                                                                                                                                                                                                                                                                                 |



# PRISMA 2009 Checklist

1  
2  
3  
4  
5  
6  
7  
8  
9  
10  
11  
12  
13  
14  
15  
16  
17  
18  
19  
20  
21  
22  
23  
24  
25  
26  
27  
28  
29  
30  
31  
32  
33  
34  
35  
36  
37  
38  
39  
40  
41  
42  
43  
44  
45  
46  
47  
48  
49

| Section/topic                      | #  | Checklist item                                                                                                                                                                                                                                                                                              | Reported on page # |
|------------------------------------|----|-------------------------------------------------------------------------------------------------------------------------------------------------------------------------------------------------------------------------------------------------------------------------------------------------------------|--------------------|
| <b>TITLE</b>                       |    |                                                                                                                                                                                                                                                                                                             |                    |
| Title                              | 1  | Identify the report as a systematic review, meta-analysis, or both.                                                                                                                                                                                                                                         | 1                  |
| <b>ABSTRACT</b>                    |    |                                                                                                                                                                                                                                                                                                             |                    |
| Structured summary                 | 2  | Provide a structured summary including, as applicable: background; objectives; data sources; study eligibility criteria, participants, and interventions; study appraisal and synthesis methods; results; limitations; conclusions and implications of key findings; systematic review registration number. | 2                  |
| <b>INTRODUCTION</b>                |    |                                                                                                                                                                                                                                                                                                             |                    |
| Rationale                          | 3  | Describe the rationale for the review in the context of what is already known.                                                                                                                                                                                                                              | 3-5                |
| Objectives                         | 4  | Provide an explicit statement of questions being addressed with reference to participants, interventions, comparisons, outcomes, and study design (PICOS).                                                                                                                                                  | 5-6                |
| <b>METHODS</b>                     |    |                                                                                                                                                                                                                                                                                                             |                    |
| Protocol and registration          | 5  | Indicate if a review protocol exists, if and where it can be accessed (e.g., Web address), and, if available, provide registration information including registration number.                                                                                                                               | N/A                |
| Eligibility criteria               | 6  | Specify study characteristics (e.g., PICOS, length of follow-up) and report characteristics (e.g., years considered, language, publication status) used as criteria for eligibility, giving rationale.                                                                                                      | 6                  |
| Information sources                | 7  | Describe all information sources (e.g., databases with dates of coverage, contact with study authors to identify additional studies) in the search and date last searched.                                                                                                                                  | 6                  |
| Search                             | 8  | Present full electronic search strategy for at least one database, including any limits used, such that it could be repeated.                                                                                                                                                                               | 6-7                |
| Study selection                    | 9  | State the process for selecting studies (i.e., screening, eligibility, included in systematic review, and, if applicable, included in the meta-analysis).                                                                                                                                                   | 7-8                |
| Data collection process            | 10 | Describe method of data extraction from reports (e.g., piloted forms, independently, in duplicate) and any processes for obtaining and confirming data from investigators.                                                                                                                                  | 8                  |
| Data items                         | 11 | List and define all variables for which data were sought (e.g., PICOS, funding sources) and any assumptions and simplifications made.                                                                                                                                                                       | 8                  |
| Risk of bias in individual studies | 12 | Describe methods used for assessing risk of bias of individual studies (including specification of whether this was done at the study or outcome level), and how this information is to be used in any data synthesis.                                                                                      | 8                  |
| Summary measures                   | 13 | State the principal summary measures (e.g., risk ratio, difference in means).                                                                                                                                                                                                                               | N/A                |
| Synthesis of results               | 14 | Describe the methods of handling data and combining results of studies, if done, including measures of consistency (e.g., $I^2$ for each meta-analysis).                                                                                                                                                    | 8-9                |

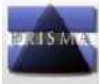

# PRISMA 2009 Checklist

Page 1 of 2

| Section/topic                 | #  | Checklist item                                                                                                                                                                                           | Reported on page # |
|-------------------------------|----|----------------------------------------------------------------------------------------------------------------------------------------------------------------------------------------------------------|--------------------|
| Risk of bias across studies   | 15 | Specify any assessment of risk of bias that may affect the cumulative evidence (e.g., publication bias, selective reporting within studies).                                                             | 8                  |
| Additional analyses           | 16 | Describe methods of additional analyses (e.g., sensitivity or subgroup analyses, meta-regression), if done, indicating which were pre-specified.                                                         | N/A                |
| <b>RESULTS</b>                |    |                                                                                                                                                                                                          |                    |
| Study selection               | 17 | Give numbers of studies screened, assessed for eligibility, and included in the review, with reasons for exclusions at each stage, ideally with a flow diagram.                                          | 9                  |
| Study characteristics         | 18 | For each study, present characteristics for which data were extracted (e.g., study size, PICOS, follow-up period) and provide the citations.                                                             | 9-10               |
| Risk of bias within studies   | 19 | Present data on risk of bias of each study and, if available, any outcome level assessment (see item 12).                                                                                                | 16-17              |
| Results of individual studies | 20 | For all outcomes considered (benefits or harms), present, for each study: (a) simple summary data for each intervention group (b) effect estimates and confidence intervals, ideally with a forest plot. | 10-16              |
| Synthesis of results          | 21 | Present results of each meta-analysis done, including confidence intervals and measures of consistency.                                                                                                  | 17                 |
| Risk of bias across studies   | 22 | Present results of any assessment of risk of bias across studies (see Item 15).                                                                                                                          | 16-17              |
| Additional analysis           | 23 | Give results of additional analyses, if done (e.g., sensitivity or subgroup analyses, meta-regression [see Item 16]).                                                                                    | N/A                |
| <b>DISCUSSION</b>             |    |                                                                                                                                                                                                          |                    |
| Summary of evidence           | 24 | Summarize the main findings including the strength of evidence for each main outcome; consider their relevance to key groups (e.g., healthcare providers, users, and policy makers).                     | 17-20              |
| Limitations                   | 25 | Discuss limitations at study and outcome level (e.g., risk of bias), and at review-level (e.g., incomplete retrieval of identified research, reporting bias).                                            | 20                 |
| Conclusions                   | 26 | Provide a general interpretation of the results in the context of other evidence, and implications for future research.                                                                                  | 20-21              |
| <b>FUNDING</b>                |    |                                                                                                                                                                                                          |                    |
| Funding                       | 27 | Describe sources of funding for the systematic review and other support (e.g., supply of data); role of funders for the systematic review.                                                               | 21                 |

From: Moher D, Liberati A, Tetzlaff J, Altman DG, The PRISMA Group (2009). Preferred Reporting Items for Systematic Reviews and Meta-Analyses: The PRISMA Statement. PLoS Med 6(7): e1000097. doi:10.1371/journal.pmed1000097

For more information, visit: [www.prisma-statement.org](http://www.prisma-statement.org).

Page 2 of 2

For peer review only - <http://bmjopen.bmj.com/site/about/guidelines.xhtml>
